# Supplementary material for: Hydrogen elimination reactivity of ruthenium pincer hydride complexes: a DFT study
Source: Royal Society of Chemistry journal article supplement (doi:10.1039/c9nj03100f), 2019-01-01
Supplement: c9nj03100f1.pdf [file c9nj03100f1.pdf]

## Hydrogen Elimination Reactivity of Ruthenium Pincer Hydride Complexes: A DFT Study

Geetha S. Remya <sup>a, b</sup> and Cherumuttathu H. Suresh <sup>a, b\*</sup>

<sup>a</sup> Chemical Sciences and Technology Division, National Institute for Interdisciplinary Science and Technology, Trivandrum, 695 019, India.

<sup>b</sup> Academy of Scientific & Innovative Research (AcSIR), Ghaziabad, - 201 002, India

\* To whom correspondence should be addressed. E-mail: sureshch@niist.res.in; sureshch@gmail.com. Ph: +91- 471-2515472; Fax: +91-471-2491712.

1. Table S1. Bonding parameters of the pincer complexes and their water complexes (Å)

| catalyst | Pincer complex |         |          | Water coordinated complex |         |          |
|----------|----------------|---------|----------|---------------------------|---------|----------|
|          | d(Ru-N)/(Ru-C) | d(Ru-H) | d(Ru-CO) | d(Ru-N)/(Ru-C)            | d(Ru-H) | d(Ru-CO) |
| PNN      | 2.094          | 1.558   | 1.860    | 2.142                     | 1.634   | 1.803    |
| NNN      | 2.037          | 1.560   | 1.861    | 2.075                     | 1.645   | 1.794    |
| PNP      | 2.151          | 1.558   | 1.860    | 2.221                     | 1.618   | 1.812    |
| SNS      | 2.099          | 1.559   | 1.866    | 2.168                     | 1.618   | 1.819    |
| SNN      | 2.066          | 1.559   | 1.865    | 2.121                     | 1.630   | 1.807    |
| SNP      | 2.119          | 1.560   | 1.865    | 2.191                     | 1.618   | 1.819    |
| ONP      | 2.077          | 1.567   | 1.867    | 2.154                     | 1.624   | 1.814    |
| ONS      | 2.057          | 1.565   | 1.867    | 2.129                     | 1.624   | 1.814    |
| ONN      | 2.030          | 1.563   | 1.864    | 2.086                     | 1.638   | 1.799    |
| ONO      | 2.029          | 1.562   | 1.868    | 2.093                     | 1.630   | 1.805    |
| PNS      | 2.127          | 1.557   | 1.862    | 2.194                     | 1.623   | 1.812    |
| NNP      | 2.082          | 1.561   | 1.865    | 2.143                     | 1.630   | 1.807    |
| NNS      | 2.063          | 1.560   | 1.869    | 2.126                     | 1.632   | 1.807    |
| PCP      | 2.135          | 1.561   | 1.910    | 2.162                     | 1.681   | 1.815    |
| PCN      | 2.078          | 1.561   | 1.917    | 2.085                     | 1.739   | 1.804    |
| NCN      | 2.026          | 1.562   | 1.919    | 2.023                     | 1.773   | 1.796    |
| SCN      | 2.057          | 1.559   | 1.923    | 2.069                     | 1.736   | 1.800    |
| OCN      | 2.022          | 1.559   | 1.922    | 2.023                     | 1.762   | 1.799    |
| SCS      | 2.091          | 1.558   | 1.922    | 2.111                     | 1.713   | 1.810    |
| OCS      | 2.049          | 1.558   | 1.927    | 2.069                     | 1.728   | 1.807    |
| OCP      | 2.071          | 1.563   | 1.920    | 2.095                     | 1.702   | 1.813    |
| SCP      | 2.113          | 1.560   | 1.915    | 2.142                     | 1.686   | 1.811    |
| PCS      | 2.110          | 1.561   | 1.916    | 2.129                     | 1.719   | 1.812    |
| NCS      | 2.054          | 1.562   | 1.924    | 2.067                     | 1.747   | 1.805    |
| NCP      | 2.078          | 1.562   | 1.916    | 2.086                     | 1.739   | 1.805    |

2. Table S2. Bonding parameters of the transition states(Å)

| catalyst | d(Ru-O) | d(O-H) | d(H-H) |
|----------|---------|--------|--------|
| PNN      | 2.219   | 1.442  | 0.970  |
| NNN      | 2.245   | 1.419  | 0.974  |
| PNP      | 2.219   | 1.496  | 0.954  |
| SNS      | 2.218   | 1.452  | 0.967  |
| SNN      | 2.225   | 1.431  | 0.972  |
| SNP      | 2.221   | 1.473  | 0.958  |
| ONP      | 2.189   | 1.518  | 0.939  |
| ONS      | 2.223   | 1.438  | 0.968  |
| ONN      | 2.217   | 1.442  | 0.968  |
| ONO      | 2.204   | 1.456  | 0.961  |
| PNS      | 2.212   | 1.461  | 0.968  |
| NNP      | 2.235   | 1.463  | 0.957  |
| NNS      | 2.232   | 1.447  | 0.964  |
| PCP      | 2.271   | 1.358  | 0.994  |
| PCN      | 2.270   | 1.311  | 1.021  |
| NCN      | 2.293   | 1.272  | 1.047  |
| SCN      | 2.255   | 1.323  | 1.013  |
| OCN      | 2.254   | 1.291  | 1.035  |
| SCS      | 2.234   | 1.361  | 0.991  |
| OCS      | 2.221   | 1.384  | 0.972  |
| OCP      | 2.236   | 1.359  | 0.988  |
| SCP      | 2.255   | 1.370  | 0.986  |
| PCS      | 2.264   | 1.339  | 1.339  |
| NCS      | 2.278   | 1.311  | 1.018  |
| NCP      | 2.280   | 1.319  | 1.012  |

3. SCF Energies (in au) and Cartesian Coordinates (in Å) for the optimized pincer catalysts, reactants, transition states, products and non-pincer complexes at BP86/BS1 level.

| Pincer complexes                  |              |              |              |                                   |              |              |              |
|-----------------------------------|--------------|--------------|--------------|-----------------------------------|--------------|--------------|--------------|
| PNN<br>E(RB-P86) = -1089.06938976 |              |              |              | NNN<br>E(RB-P86) = -802.380722700 |              |              |              |
| 15                                | -1.784409000 | -1.272727000 | 0.007673000  | 8                                 | -3.832501000 | 0.375385000  | -0.061608000 |
| 8                                 | -2.877624000 | 2.542177000  | -0.084068000 | 6                                 | -2.659529000 | 0.254734000  | -0.032581000 |
| 6                                 | -1.950800000 | 1.818177000  | -0.070256000 | 44                                | -0.807901000 | 0.069387000  | -0.005023000 |
| 44                                | -0.514487000 | 0.636871000  | -0.047101000 | 7                                 | -0.144884000 | 2.183932000  | 0.038562000  |
| 7                                 | 1.314063000  | 1.974333000  | 0.059148000  | 1                                 | -0.957715000 | 0.075646000  | 1.547452000  |
| 1                                 | -0.695184000 | 0.635793000  | 1.500284000  | 7                                 | 1.215479000  | -0.141709000 | -0.103689000 |
| 7                                 | 1.049658000  | -0.754320000 | -0.109123000 | 6                                 | 1.719243000  | -1.438670000 | 0.079559000  |
| 6                                 | 0.789152000  | -2.126835000 | 0.070576000  | 6                                 | 2.018392000  | 0.945324000  | -0.236834000 |
| 6                                 | 2.322570000  | -0.290201000 | -0.251454000 | 6                                 | 0.781475000  | -2.439796000 | 0.171768000  |

|                            |              |              |              |                            |              |              |              |
|----------------------------|--------------|--------------|--------------|----------------------------|--------------|--------------|--------------|
| 6                          | -0.537602000 | -2.538405000 | 0.167746000  | 6                          | 1.229555000  | 2.186001000  | -0.597556000 |
| 6                          | 2.395269000  | 1.177819000  | -0.612413000 | 6                          | 3.161370000  | -1.563987000 | 0.150303000  |
| 6                          | 1.936705000  | -3.001987000 | 0.135647000  | 6                          | 3.396211000  | 0.859307000  | -0.157433000 |
| 6                          | 3.437345000  | -1.108313000 | -0.177408000 | 1                          | 3.601542000  | -2.553568000 | 0.293523000  |
| 1                          | 1.764354000  | -4.070994000 | 0.279838000  | 1                          | 4.029515000  | 1.740295000  | -0.269114000 |
| 1                          | 4.442347000  | -0.699807000 | -0.292757000 | 6                          | 3.956321000  | -0.447254000 | 0.045034000  |
| 6                          | 3.214173000  | -2.503337000 | 0.025539000  | 1                          | 1.767354000  | 3.115341000  | -0.330861000 |
| 1                          | 3.391128000  | 1.602368000  | -0.378297000 | 1                          | 1.069066000  | 2.192707000  | -1.690050000 |
| 1                          | 2.238016000  | 1.282909000  | -1.700975000 | 1                          | 1.020264000  | -3.498069000 | 0.296388000  |
| 1                          | -0.789447000 | -3.593417000 | 0.295487000  | 6                          | -1.448786000 | -2.760702000 | 1.070720000  |
| 6                          | -3.006759000 | -1.488584000 | 1.381641000  | 1                          | -1.115341000 | -2.375468000 | 2.041690000  |
| 1                          | -2.495639000 | -1.323773000 | 2.339986000  | 1                          | -2.514735000 | -2.532179000 | 0.930820000  |
| 1                          | -3.822949000 | -0.757012000 | 1.279650000  | 1                          | -1.298322000 | -3.857100000 | 1.038313000  |
| 1                          | -3.426609000 | -2.507219000 | 1.365108000  | 6                          | -1.118157000 | -2.615226000 | -1.335186000 |
| 6                          | -2.834336000 | -1.671057000 | -1.475216000 | 1                          | -2.189040000 | -2.401845000 | -1.465172000 |
| 1                          | -3.657054000 | -0.944967000 | -1.565696000 | 1                          | -0.541469000 | -2.119478000 | -2.129320000 |
| 1                          | -2.210521000 | -1.620415000 | -2.379072000 | 1                          | -0.948592000 | -3.706202000 | -1.402861000 |
| 1                          | -3.252167000 | -2.687176000 | -1.387646000 | 6                          | -0.015853000 | 2.640544000  | 1.452479000  |
| 6                          | 1.678872000  | 2.191475000  | 1.485008000  | 1                          | 0.681880000  | 1.979411000  | 1.982137000  |
| 1                          | 1.835347000  | 1.219930000  | 1.971312000  | 1                          | 0.361936000  | 3.682199000  | 1.486794000  |
| 1                          | 2.606902000  | 2.794299000  | 1.559969000  | 1                          | -0.997722000 | 2.585524000  | 1.938947000  |
| 1                          | 0.858203000  | 2.714742000  | 1.992461000  | 6                          | -1.022155000 | 3.131218000  | -0.697663000 |
| 6                          | 1.165486000  | 3.286606000  | -0.616605000 | 1                          | -2.003960000 | 3.162647000  | -0.207645000 |
| 1                          | 0.386225000  | 3.867476000  | -0.105564000 | 1                          | -0.585415000 | 4.150023000  | -0.709516000 |
| 1                          | 2.116322000  | 3.857128000  | -0.597229000 | 1                          | -1.155232000 | 2.778965000  | -1.730058000 |
| 1                          | 0.859608000  | 3.131987000  | -1.661325000 | 1                          | 5.043078000  | -0.555074000 | 0.108386000  |
| 1                          | 4.069181000  | -3.182915000 | 0.087341000  | 7                          | -0.648875000 | -2.103488000 | -0.005103000 |
| PNP                        |              |              |              | SNS                        |              |              |              |
| E(RB-P86) = -1375.73725939 |              |              |              | E(RB-P86) = -1409.53006664 |              |              |              |
| 15                         | 2.374513000  | 0.079010000  | 0.026974000  | 8                          | 3.799509000  | -1.046704000 | -0.410428000 |
| 8                          | 0.959418000  | -3.721732000 | -0.082158000 | 6                          | 2.669950000  | -0.744652000 | -0.333662000 |
| 6                          | 0.659787000  | -2.587243000 | -0.091347000 | 44                         | 0.872631000  | -0.257607000 | -0.216435000 |
| 44                         | 0.192095000  | -0.786759000 | -0.090964000 | 1                          | 1.085193000  | -0.230397000 | 1.328178000  |
| 1                          | 0.250131000  | -0.887566000 | 1.462804000  | 7                          | -1.148406000 | 0.307197000  | -0.198911000 |
| 7                          | -0.301493000 | 1.305593000  | -0.147646000 | 6                          | -1.465068000 | 1.668402000  | -0.011005000 |
| 6                          | 0.737202000  | 2.246959000  | 0.051761000  | 6                          | -2.152634000 | -0.622737000 | -0.281631000 |
| 6                          | -1.598321000 | 1.746053000  | -0.272873000 | 6                          | -0.442928000 | 2.602543000  | 0.044246000  |
| 6                          | 2.058816000  | 1.815887000  | 0.160375000  | 6                          | -1.722819000 | -2.014691000 | -0.672570000 |
| 6                          | -2.641431000 | 0.699111000  | -0.608040000 | 6                          | -2.860161000 | 2.026326000  | 0.114720000  |
| 6                          | 0.375260000  | 3.641820000  | 0.141635000  | 6                          | -3.490344000 | -0.306206000 | -0.125711000 |
| 6                          | -1.959034000 | 3.080644000  | -0.168070000 | 1                          | -3.112160000 | 3.079717000  | 0.255314000  |
| 1                          | 1.176095000  | 4.367234000  | 0.301106000  | 1                          | -4.256000000 | -1.079637000 | -0.201549000 |
| 1                          | -3.002757000 | 3.377599000  | -0.279690000 | 6                          | -3.837498000 | 1.064496000  | 0.077507000  |
| 6                          | -0.933721000 | 4.043578000  | 0.046748000  | 1                          | -2.439736000 | -2.782139000 | -0.343681000 |
| 1                          | -3.643229000 | 1.007874000  | -0.267036000 | 1                          | -1.616673000 | -2.090458000 | -1.768201000 |
| 1                          | -2.692675000 | 0.573167000  | -1.705901000 | 1                          | -0.632055000 | 3.675566000  | 0.065388000  |
| 1                          | 2.860361000  | 2.546163000  | 0.293999000  | 6                          | 2.174005000  | 2.635249000  | 1.149355000  |
| 6                          | 3.444223000  | -0.441930000 | 1.446753000  | 1                          | 3.199963000  | 2.263275000  | 1.022439000  |
| 1                          | 2.892787000  | -0.279991000 | 2.382994000  | 1                          | 2.171232000  | 3.734016000  | 1.160471000  |
| 1                          | 3.696785000  | -1.509916000 | 1.359544000  | 1                          | 1.720596000  | 2.231411000  | 2.061502000  |
| 1                          | 4.372781000  | 0.151130000  | 1.466409000  | 6                          | -0.427531000 | -2.701500000 | 1.735512000  |
| 6                          | 3.517686000  | -0.209855000 | -1.412749000 | 1                          | 0.531694000  | -2.809850000 | 2.257427000  |
| 1                          | 3.784888000  | -1.275763000 | -1.482033000 | 1                          | -0.967087000 | -1.828710000 | 2.124692000  |
| 1                          | 3.010901000  | 0.093719000  | -2.339934000 | 1                          | -1.020723000 | -3.621159000 | 1.844441000  |
| 1                          | 4.435915000  | 0.388812000  | -1.297857000 | 1                          | -4.887961000 | 1.346413000  | 0.190490000  |
| 6                          | -2.864108000 | -1.011136000 | 1.762088000  | 16                         | 1.204596000  | 2.077682000  | -0.327352000 |
| 1                          | -2.429854000 | -0.193118000 | 2.354564000  | 16                         | -0.029540000 | -2.451024000 | -0.046307000 |
| 1                          | -3.960441000 | -0.904377000 | 1.732785000  |                            |              |              |              |
| 1                          | -2.601642000 | -1.963706000 | 2.245526000  |                            |              |              |              |
| 6                          | -3.196333000 | -2.161088000 | -0.865440000 |                            |              |              |              |
| 1                          | -3.024065000 | -3.174329000 | -0.472591000 |                            |              |              |              |
| 1                          | -4.266095000 | -1.914001000 | -0.769588000 |                            |              |              |              |
| 1                          | -2.913978000 | -2.154439000 | -1.928506000 |                            |              |              |              |
| 1                          | -1.190377000 | 5.103856000  | 0.128710000  |                            |              |              |              |
| 15                         | -2.132697000 | -0.964147000 | 0.063882000  |                            |              |              |              |

|                                   |              |              |              |                                   |              |              |              |
|-----------------------------------|--------------|--------------|--------------|-----------------------------------|--------------|--------------|--------------|
| SNN<br>E(RB-P86) = -1105.96001585 |              |              |              | ONP<br>E(RB-P86) = -1069.60067269 |              |              |              |
| 8                                 | 3.872013000  | -0.207008000 | -0.270824000 | 8                                 | 3.355002000  | 1.930667000  | -0.207294000 |
| 6                                 | 2.699407000  | -0.143451000 | -0.219854000 | 6                                 | 2.288638000  | 1.441049000  | -0.142895000 |
| 44                                | 0.839899000  | -0.029607000 | -0.138176000 | 44                                | 0.613920000  | 0.623301000  | -0.040223000 |
| 1                                 | 1.033993000  | 0.188967000  | 1.392829000  | 1                                 | 0.818443000  | 0.655062000  | 1.512878000  |
| 7                                 | -1.222339000 | 0.091393000  | -0.140801000 | 7                                 | -1.237909000 | -0.313634000 | -0.115918000 |
| 6                                 | -1.860695000 | 1.341284000  | -0.071193000 | 6                                 | -2.366247000 | 0.537326000  | -0.050368000 |
| 6                                 | -1.937049000 | -1.070055000 | -0.152524000 | 6                                 | -1.412109000 | -1.679258000 | -0.127660000 |
| 6                                 | -1.074639000 | 2.481799000  | -0.095253000 | 6                                 | -2.138413000 | 1.890247000  | -0.044664000 |
| 6                                 | -1.080958000 | -2.283863000 | -0.434789000 | 6                                 | -0.147075000 | -2.490473000 | -0.325568000 |
| 6                                 | -3.304538000 | 1.334672000  | 0.013512000  | 6                                 | -3.682104000 | -0.061487000 | 0.012823000  |
| 6                                 | -3.314455000 | -1.104613000 | -0.042548000 | 6                                 | -2.657956000 | -2.268378000 | -0.045971000 |
| 1                                 | -3.828036000 | 2.292018000  | 0.063509000  | 1                                 | -4.553569000 | 0.595470000  | 0.063468000  |
| 1                                 | -3.856584000 | -2.051198000 | -0.056521000 | 1                                 | -2.756621000 | -3.354575000 | -0.073794000 |
| 6                                 | -3.998915000 | 0.149031000  | 0.043782000  | 6                                 | -3.815620000 | -1.423574000 | 0.027945000  |
| 1                                 | -1.563293000 | -3.216863000 | -0.085711000 | 1                                 | -0.167344000 | -3.425428000 | 0.258202000  |
| 1                                 | -0.940147000 | -2.366915000 | -1.527162000 | 1                                 | -0.064638000 | -2.774752000 | -1.390627000 |
| 1                                 | -1.488840000 | 3.487395000  | -0.162530000 | 1                                 | -2.885691000 | 2.680177000  | -0.066689000 |
| 6                                 | 1.442346000  | 3.178950000  | 1.013363000  | 6                                 | -0.530657000 | 3.635893000  | 0.320115000  |
| 1                                 | 2.529227000  | 3.046093000  | 0.922182000  | 1                                 | 0.509051000  | 3.871680000  | 0.065567000  |
| 1                                 | 1.185682000  | 4.244762000  | 0.936545000  | 1                                 | -1.211658000 | 4.348852000  | -0.174529000 |
| 1                                 | 1.073041000  | 2.751930000  | 1.952728000  | 1                                 | -0.678917000 | 3.661167000  | 1.411429000  |
| 6                                 | 0.216252000  | -2.451424000 | 1.625264000  | 6                                 | 1.990499000  | -2.116102000 | 1.684614000  |
| 1                                 | 1.203203000  | -2.294617000 | 2.078410000  | 1                                 | 2.893589000  | -1.559589000 | 1.976265000  |
| 1                                 | -0.503974000 | -1.768697000 | 2.093853000  | 1                                 | 1.216968000  | -1.941703000 | 2.445874000  |
| 1                                 | -0.107213000 | -3.499129000 | 1.786948000  | 1                                 | 2.224005000  | -3.191685000 | 1.631621000  |
| 1                                 | -5.089607000 | 0.162040000  | 0.123037000  | 1                                 | -4.809632000 | -1.875056000 | 0.088277000  |
| 16                                | 0.663845000  | 2.297463000  | -0.419544000 | 8                                 | -0.790354000 | 2.306351000  | -0.185269000 |
| 7                                 | 0.295505000  | -2.154752000 | 0.166591000  | 6                                 | 2.655419000  | -2.126579000 | -1.115007000 |
| 6                                 | 1.207101000  | -3.133708000 | -0.481025000 | 1                                 | 2.362946000  | -1.874257000 | -2.144485000 |
| 1                                 | 1.301809000  | -2.895306000 | -1.549512000 | 1                                 | 3.620929000  | -1.643409000 | -0.903046000 |
| 1                                 | 2.198696000  | -3.062022000 | -0.015546000 | 1                                 | 2.768608000  | -3.218912000 | -1.020506000 |
| 1                                 | 0.823547000  | -4.167304000 | -0.366971000 | 15                                | 1.382866000  | -1.474065000 | 0.058778000  |
| ONS<br>E(RB-P86) = -1086.48926484 |              |              |              | ONN<br>E(RB-P86) = -782.913834019 |              |              |              |
| 8                                 | 3.946374000  | -0.161735000 | -0.436133000 | 8                                 | 3.848262000  | 0.565337000  | -0.285858000 |
| 6                                 | 2.784077000  | -0.078423000 | -0.295249000 | 6                                 | 2.679989000  | 0.450153000  | -0.184745000 |
| 44                                | 0.929866000  | 0.039308000  | -0.110659000 | 44                                | 0.831877000  | 0.247545000  | -0.053748000 |
| 1                                 | 1.195998000  | -0.083262000 | 1.426652000  | 1                                 | 1.065411000  | 0.342757000  | 1.488625000  |
| 7                                 | -1.120637000 | 0.190954000  | -0.167377000 | 7                                 | -1.181998000 | 0.000486000  | -0.125423000 |
| 6                                 | -1.656128000 | 1.480923000  | 0.038860000  | 6                                 | -1.998094000 | 1.141746000  | -0.037383000 |
| 6                                 | -1.951478000 | -0.890003000 | -0.313867000 | 6                                 | -1.702057000 | -1.256332000 | -0.194728000 |
| 6                                 | -0.759990000 | 2.514411000  | 0.128826000  | 6                                 | -1.341690000 | 2.345735000  | -0.021425000 |
| 6                                 | -1.254046000 | -2.159142000 | -0.735502000 | 6                                 | -0.633356000 | -2.280341000 | -0.502932000 |
| 6                                 | -3.094228000 | 1.612860000  | 0.137157000  | 6                                 | -3.429007000 | 0.920702000  | 0.017260000  |
| 6                                 | -3.323494000 | -0.793323000 | -0.198680000 | 6                                 | -3.058107000 | -1.500326000 | -0.123714000 |
| 1                                 | -3.521000000 | 2.605152000  | 0.300477000  | 1                                 | -4.097019000 | 1.782398000  | 0.086445000  |
| 1                                 | -3.957709000 | -1.671048000 | -0.330731000 | 1                                 | -3.457433000 | -2.513233000 | -0.190119000 |
| 6                                 | -3.893484000 | 0.504873000  | 0.037326000  | 6                                 | -3.927292000 | -0.358008000 | -0.010287000 |
| 1                                 | -1.778121000 | -3.068550000 | -0.404609000 | 1                                 | -0.920185000 | -3.299582000 | -0.184095000 |
| 1                                 | -1.158519000 | -2.192689000 | -1.833995000 | 1                                 | -0.472902000 | -2.296887000 | -1.595091000 |
| 1                                 | -0.980037000 | 3.574982000  | 0.222007000  | 1                                 | -1.777103000 | 3.342084000  | -0.028614000 |
| 6                                 | 1.535323000  | 3.123164000  | 0.506565000  | 6                                 | 0.771204000  | 3.418109000  | 0.384396000  |
| 1                                 | 2.537467000  | 2.829227000  | 0.174586000  | 1                                 | 1.821531000  | 3.332032000  | 0.082737000  |
| 1                                 | 1.299275000  | 4.137914000  | 0.145396000  | 1                                 | 0.339941000  | 4.354783000  | -0.007390000 |
| 1                                 | 1.459504000  | 3.079243000  | 1.604296000  | 1                                 | 0.676913000  | 3.382884000  | 1.481167000  |
| 6                                 | 0.210017000  | -2.766900000 | 1.597615000  | 6                                 | 0.687177000  | -2.316297000 | 1.554763000  |
| 1                                 | 1.176127000  | -2.709552000 | 2.114681000  | 1                                 | 1.627036000  | -2.003629000 | 2.025750000  |
| 1                                 | -0.510326000 | -2.089899000 | 2.074133000  | 1                                 | -0.150304000 | -1.818370000 | 2.059486000  |
| 1                                 | -0.154798000 | -3.804727000 | 1.592839000  | 1                                 | 0.571830000  | -3.415013000 | 1.636304000  |
| 1                                 | -4.978650000 | 0.606801000  | 0.122701000  | 1                                 | -5.008244000 | -0.514950000 | 0.041090000  |
| 16                                | 0.517732000  | -2.235395000 | -0.146653000 | 6                                 | 1.780027000  | -2.661375000 | -0.583268000 |
| 8                                 | 0.608377000  | 2.186218000  | -0.093822000 | 1                                 | 2.741084000  | -2.437749000 | -0.102945000 |

|                                   |              |              |              |              |
|-----------------------------------|--------------|--------------|--------------|--------------|
|                                   | 1            | 1.589197000  | -3.751547000 | -0.535777000 |
|                                   | 1            | 1.825425000  | -2.339366000 | -1.632303000 |
|                                   | 8            | 0.076675000  | 2.296506000  | -0.212788000 |
|                                   | 7            | 0.703425000  | -1.908476000 | 0.117020000  |
| ONO<br>E(RB-P86) = -763.443246294 |              |              |              |              |
| 8                                 | 3.930559000  | -0.477507000 | -0.391686000 |              |
| 6                                 | 2.771504000  | -0.329196000 | -0.266311000 |              |
| 44                                | 0.923227000  | -0.108852000 | -0.106749000 |              |
| 1                                 | 1.158850000  | -0.158446000 | 1.436551000  |              |
| 7                                 | -1.092623000 | 0.123221000  | -0.130623000 |              |
| 6                                 | -1.591203000 | 1.426092000  | 0.031195000  |              |
| 6                                 | -1.911617000 | -0.958429000 | -0.233070000 |              |
| 6                                 | -0.649122000 | 2.421118000  | 0.089648000  |              |
| 6                                 | -1.145709000 | -2.208233000 | -0.613098000 |              |
| 6                                 | -3.030683000 | 1.570719000  | 0.107576000  |              |
| 6                                 | -3.284413000 | -0.857542000 | -0.133939000 |              |
| 1                                 | -3.459142000 | 2.568748000  | 0.223809000  |              |
| 1                                 | -3.926714000 | -1.734978000 | -0.220582000 |              |
| 6                                 | -3.835548000 | 0.460503000  | 0.039989000  |              |
| 1                                 | -1.648825000 | -3.134173000 | -0.291004000 |              |
| 1                                 | -1.003980000 | -2.239226000 | -1.706390000 |              |
| 1                                 | -0.807841000 | 3.494795000  | 0.143671000  |              |
| 6                                 | 1.678888000  | 2.895992000  | 0.485879000  |              |
| 1                                 | 2.667255000  | 2.574591000  | 0.138494000  |              |
| 1                                 | 1.480594000  | 3.931784000  | 0.164607000  |              |
| 1                                 | 1.600366000  | 2.809793000  | 1.580430000  |              |
| 6                                 | 0.312500000  | -2.841185000 | 1.224809000  |              |
| 1                                 | 1.364213000  | -2.784054000 | 1.526092000  |              |
| 1                                 | -0.318876000 | -2.317599000 | 1.960167000  |              |
| 1                                 | 0.000669000  | -3.894621000 | 1.122210000  |              |
| 1                                 | -4.920415000 | 0.578565000  | 0.108531000  |              |
| 8                                 | 0.711878000  | 2.022636000  | -0.153467000 |              |
| 8                                 | 0.226645000  | -2.201036000 | -0.076265000 |              |
| PNS<br>E(RB-P86) = -1392.63542334 |              |              |              |              |
| 15                                | 1.727509000  | -1.360171000 | 0.092343000  |              |
| 8                                 | 3.002544000  | 2.385253000  | -0.137187000 |              |
| 6                                 | 2.042404000  | 1.711154000  | -0.111833000 |              |
| 44                                | 0.540907000  | 0.610844000  | -0.072560000 |              |
| 16                                | -1.217021000 | 2.217794000  | -0.493156000 |              |
| 1                                 | 0.751896000  | 0.459151000  | -1.607722000 |              |
| 7                                 | -1.119001000 | -0.713726000 | 0.054379000  |              |
| 6                                 | -0.876809000 | -2.105569000 | 0.005062000  |              |
| 6                                 | -2.406533000 | -0.246788000 | 0.061647000  |              |
| 6                                 | 0.436017000  | -2.571966000 | 0.015566000  |              |
| 6                                 | -2.588225000 | 1.231330000  | 0.298956000  |              |
| 6                                 | -2.022334000 | -2.981447000 | -0.059783000 |              |
| 6                                 | -3.516264000 | -1.072042000 | -0.037815000 |              |
| 1                                 | -1.842204000 | -4.058082000 | -0.096457000 |              |
| 1                                 | -4.522399000 | -0.650883000 | -0.036341000 |              |
| 6                                 | -3.299683000 | -2.477962000 | -0.095821000 |              |
| 1                                 | -3.558032000 | 1.582459000  | -0.082084000 |              |
| 1                                 | -2.530883000 | 1.450628000  | 1.378871000  |              |
| 1                                 | 0.641036000  | -3.644449000 | -0.006553000 |              |
| 6                                 | 2.981937000  | -1.743330000 | -1.213245000 |              |
| 1                                 | 2.501892000  | -1.664604000 | -2.198156000 |              |
| 1                                 | 3.813919000  | -1.024454000 | -1.161094000 |              |
| 1                                 | 3.374370000  | -2.764532000 | -1.081434000 |              |
| 6                                 | 2.718227000  | -1.623750000 | 1.643948000  |              |
| 1                                 | 3.558982000  | -0.914162000 | 1.686047000  |              |
| 1                                 | 2.067877000  | -1.462193000 | 2.515441000  |              |
| 1                                 | 3.108985000  | -2.653712000 | 1.678355000  |              |
| 6                                 | -1.169030000 | 3.652502000  | 0.657569000  |              |
| 1                                 | -0.332928000 | 4.284149000  | 0.329522000  |              |
| 1                                 | -2.108087000 | 4.219620000  | 0.583805000  |              |
| 1                                 | -0.995378000 | 3.319652000  | 1.690058000  |              |
| 1                                 | -4.154835000 | -3.156604000 | -0.162918000 |              |
| PCP<br>E(RB-P86) = -1359.67996029 |              |              |              |              |
| 15                                | 2.298185000  | -0.383827000 | -0.007010000 |              |
| 8                                 | 0.122200000  | -3.935438000 | -0.104878000 |              |
| 6                                 | 0.086108000  | -2.763801000 | -0.115745000 |              |
| 44                                | 0.025635000  | -0.855025000 | -0.075003000 |              |
| 1                                 | 0.055608000  | -0.948012000 | 1.483303000  |              |
| 6                                 | 1.107135000  | 2.057435000  | 0.302475000  |              |
| 6                                 | -1.242056000 | 1.992995000  | -0.326659000 |              |
| 6                                 | 2.368783000  | 1.329592000  | 0.725737000  |              |
| 6                                 | -2.493919000 | 1.199751000  | -0.660380000 |              |
| 6                                 | 1.075038000  | 3.461697000  | 0.264816000  |              |
| 6                                 | -1.271432000 | 3.398737000  | -0.339253000 |              |
| 1                                 | 1.975743000  | 4.038311000  | 0.501649000  |              |
| 1                                 | -2.200635000 | 3.925924000  | -0.581442000 |              |
| 6                                 | -0.113100000 | 4.132936000  | -0.054510000 |              |
| 1                                 | -3.417839000 | 1.689124000  | -0.304625000 |              |
| 1                                 | -2.599763000 | 1.065634000  | -1.753138000 |              |
| 1                                 | 3.293361000  | 1.866024000  | 0.449919000  |              |
| 6                                 | 3.507281000  | -1.372770000 | 0.982870000  |              |
| 1                                 | 3.121805000  | -1.491501000 | 2.005879000  |              |
| 1                                 | 3.608142000  | -2.373520000 | 0.537072000  |              |
| 1                                 | 4.496855000  | -0.888887000 | 1.016483000  |              |
| 6                                 | 3.179352000  | -0.189195000 | -1.630069000 |              |
| 1                                 | 3.192595000  | -1.152118000 | -2.161890000 |              |
| 1                                 | 2.632823000  | 0.541444000  | -2.244660000 |              |
| 1                                 | 4.214678000  | 0.160622000  | -1.486248000 |              |
| NCN<br>E(RB-P86) = -786.322105030 |              |              |              |              |
| 7                                 | 0.360175000  | 2.163553000  | -0.064986000 |              |
| 8                                 | 3.927222000  | 0.049461000  | 0.060182000  |              |
| 6                                 | 2.751010000  | 0.037340000  | -0.003136000 |              |
| 44                                | 0.831903000  | 0.014925000  | -0.012422000 |              |
| 1                                 | 0.885268000  | 0.056129000  | 1.548155000  |              |
| 6                                 | -1.901829000 | 1.181493000  | 0.276029000  |              |
| 6                                 | -1.887968000 | -1.209193000 | -0.213868000 |              |
| 6                                 | -1.001073000 | 2.354968000  | 0.589862000  |              |
| 6                                 | -0.987763000 | -2.375255000 | -0.565125000 |              |
| 6                                 | -3.304478000 | 1.187583000  | 0.247754000  |              |
| 6                                 | -3.292214000 | -1.220193000 | -0.220378000 |              |
| 1                                 | -3.874421000 | 2.108303000  | 0.415726000  |              |
| 1                                 | -3.853293000 | -2.141655000 | -0.412927000 |              |
| 6                                 | -3.990740000 | -0.019779000 | 0.010794000  |              |
| 1                                 | -1.380302000 | -3.357944000 | -0.235751000 |              |
| 1                                 | -0.863219000 | -2.429594000 | -1.661381000 |              |
| 1                                 | -1.419060000 | 3.335658000  | 0.286492000  |              |
| 6                                 | 1.347959000  | 3.049644000  | 0.603428000  |              |
| 1                                 | 1.467290000  | 2.729792000  | 1.646696000  |              |
| 1                                 | 2.316276000  | 2.955379000  | 0.094893000  |              |
| 1                                 | 1.015790000  | 4.107138000  | 0.571616000  |              |
| 6                                 | 0.262629000  | 2.539533000  | -1.503090000 |              |
| 1                                 | 1.226762000  | 2.343682000  | -1.993325000 |              |
| 1                                 | -0.521310000 | 1.935825000  | -1.981480000 |              |
| 1                                 | 0.009017000  | 3.613035000  | -1.614310000 |              |

|                                   |              |              |              |                                   |              |              |              |
|-----------------------------------|--------------|--------------|--------------|-----------------------------------|--------------|--------------|--------------|
| 6                                 | -2.987908000 | -0.347936000 | 1.767249000  | 6                                 | 0.399005000  | -2.652075000 | 1.427776000  |
| 1                                 | -2.406933000 | 0.406243000  | 2.317003000  | 1                                 | -0.368125000 | -2.103224000 | 1.988019000  |
| 1                                 | -4.047744000 | -0.047916000 | 1.733532000  | 1                                 | 0.181552000  | -3.739335000 | 1.463761000  |
| 1                                 | -2.894776000 | -1.308915000 | 2.294051000  | 1                                 | 1.379213000  | -2.454430000 | 1.879575000  |
| 6                                 | -3.552233000 | -1.537154000 | -0.797538000 | 6                                 | 1.373645000  | -2.987683000 | -0.761402000 |
| 1                                 | -3.565980000 | -2.543560000 | -0.352994000 | 1                                 | 2.367172000  | -2.896769000 | -0.303509000 |
| 1                                 | -4.557069000 | -1.091492000 | -0.715622000 | 1                                 | 1.072582000  | -4.055081000 | -0.778453000 |
| 1                                 | -3.284805000 | -1.637020000 | -1.859993000 | 1                                 | 1.425962000  | -2.609966000 | -1.792630000 |
| 1                                 | -0.137487000 | 5.226196000  | -0.074095000 | 1                                 | -5.084152000 | -0.023710000 | 0.000713000  |
| 15                                | -2.276000000 | -0.507367000 | 0.066485000  | 6                                 | -1.193129000 | -0.013260000 | 0.046346000  |
| 6                                 | -0.046246000 | 1.278158000  | -0.015701000 | 1                                 | -0.809792000 | 2.394569000  | 1.675893000  |
| 1                                 | 2.382303000  | 1.193276000  | 1.823098000  | 7                                 | 0.404821000  | -2.171967000 | 0.016042000  |
| PCN<br>E(RB-P86) = -1073.00761758 |              |              |              | OCP<br>E(RB-P86) = -1053.55017079 |              |              |              |
| 15                                | 1.686482000  | -1.324191000 | 0.041034000  | 8                                 | -0.816317000 | 2.306214000  | -0.257575000 |
| 8                                 | 3.019845000  | 2.502197000  | -0.010911000 | 8                                 | 3.445014000  | 1.883276000  | 0.015363000  |
| 6                                 | 2.059871000  | 1.827241000  | 0.033798000  | 6                                 | 2.355217000  | 1.449508000  | -0.009882000 |
| 44                                | 0.557519000  | 0.637026000  | 0.031464000  | 44                                | 0.625171000  | 0.619131000  | 0.034330000  |
| 1                                 | 0.695880000  | 0.561434000  | -1.521574000 | 1                                 | 0.794453000  | 0.479457000  | 1.582052000  |
| 6                                 | -0.927452000 | -2.081386000 | -0.277433000 | 6                                 | -2.371999000 | 0.469938000  | 0.003668000  |
| 6                                 | -2.323567000 | -0.155986000 | 0.251890000  | 6                                 | -1.377696000 | -1.744430000 | 0.180498000  |
| 6                                 | 0.461404000  | -2.597526000 | -0.602613000 | 6                                 | -2.200172000 | 1.966147000  | 0.060478000  |
| 6                                 | -2.363667000 | 1.314324000  | 0.610360000  | 6                                 | -0.124053000 | -2.569451000 | 0.400794000  |
| 6                                 | -2.065637000 | -2.905472000 | -0.247209000 | 6                                 | -3.649202000 | -0.106681000 | -0.100666000 |
| 6                                 | -3.463822000 | -0.974179000 | 0.258536000  | 6                                 | -2.654469000 | -2.320333000 | 0.081352000  |
| 1                                 | -1.978198000 | -3.980630000 | -0.438073000 | 1                                 | -4.539966000 | 0.522659000  | -0.206666000 |
| 1                                 | -4.454823000 | -0.553453000 | 0.462935000  | 1                                 | -2.777142000 | -3.408059000 | 0.120559000  |
| 6                                 | -3.329198000 | -2.350612000 | 0.013317000  | 6                                 | -3.786097000 | -1.501705000 | -0.065776000 |
| 1                                 | -3.322406000 | 1.799349000  | 0.334577000  | 1                                 | -0.022256000 | -2.834619000 | 1.469581000  |
| 1                                 | -2.245338000 | 1.436401000  | 1.702162000  | 1                                 | -0.112124000 | -3.515138000 | -0.168532000 |
| 1                                 | 0.664612000  | -3.604918000 | -0.198966000 | 1                                 | -2.857243000 | 2.498914000  | -0.652944000 |
| 6                                 | 3.213091000  | -1.610986000 | -0.963761000 | 6                                 | -0.523471000 | 3.695871000  | -0.018112000 |
| 1                                 | 3.020144000  | -1.312668000 | -2.004397000 | 1                                 | -0.610755000 | 3.930186000  | 1.057523000  |
| 1                                 | 4.027182000  | -0.983059000 | -0.572171000 | 1                                 | 0.506634000  | 3.863588000  | -0.352875000 |
| 1                                 | 3.523013000  | -2.668191000 | -0.934619000 | 1                                 | -1.217635000 | 4.330292000  | -0.597302000 |
| 6                                 | 2.179656000  | -2.014679000 | 1.694355000  | 6                                 | 2.712472000  | -2.103216000 | 1.057279000  |
| 1                                 | 2.915184000  | -1.346793000 | 2.166793000  | 1                                 | 2.473043000  | -1.855690000 | 2.101330000  |
| 1                                 | 1.289437000  | -2.065745000 | 2.338689000  | 1                                 | 2.849080000  | -3.192129000 | 0.957749000  |
| 1                                 | 2.614034000  | -3.022912000 | 1.594950000  | 1                                 | 3.649538000  | -1.593372000 | 0.788419000  |
| 6                                 | -1.556356000 | 2.337704000  | -1.451844000 | 6                                 | 1.879389000  | -2.118690000 | -1.700601000 |
| 1                                 | -1.787521000 | 1.393759000  | -1.961144000 | 1                                 | 2.759138000  | -1.553524000 | -2.042053000 |
| 1                                 | -2.433504000 | 3.014806000  | -1.511442000 | 1                                 | 2.126316000  | -3.192498000 | -1.665191000 |
| 1                                 | -0.695035000 | 2.806884000  | -1.945078000 | 1                                 | 1.061790000  | -1.957841000 | -2.418830000 |
| 6                                 | -0.995129000 | 3.338112000  | 0.679468000  | 1                                 | -4.778107000 | -1.953309000 | -0.152294000 |
| 1                                 | -0.188650000 | 3.892513000  | 0.181316000  | 6                                 | -1.211526000 | -0.334771000 | 0.118290000  |
| 1                                 | -1.915317000 | 3.957857000  | 0.682177000  | 1                                 | -2.412612000 | 2.349010000  | 1.079004000  |
| 1                                 | -0.694907000 | 3.139044000  | 1.718659000  | 15                                | 1.352027000  | -1.491249000 | -0.034419000 |
| 1                                 | -4.213663000 | -2.993712000 | 0.022501000  |                                   |              |              |              |
| 6                                 | -1.040044000 | -0.690650000 | -0.018006000 |                                   |              |              |              |
| 1                                 | 0.609316000  | -2.648515000 | -1.697399000 |                                   |              |              |              |
| 7                                 | -1.215879000 | 2.054181000  | -0.031095000 |                                   |              |              |              |
| SCN<br>E(RB-P86) = -1089.89965156 |              |              |              | OCN<br>E(RB-P86) = -766.858050957 |              |              |              |
| 16                                | 0.699993000  | 2.199621000  | -0.512381000 | 8                                 | 0.029458000  | 2.298174000  | -0.286309000 |
| 8                                 | 3.909677000  | -0.388110000 | -0.022799000 | 8                                 | 3.906442000  | 0.571579000  | -0.051779000 |
| 6                                 | 2.742248000  | -0.301430000 | -0.107930000 | 6                                 | 2.737686000  | 0.445375000  | -0.098366000 |
| 44                                | 0.831744000  | -0.085287000 | -0.135372000 | 44                                | 0.828505000  | 0.226319000  | -0.081634000 |
| 1                                 | 0.897948000  | 0.154325000  | 1.403786000  | 1                                 | 0.898876000  | 0.326266000  | 1.472950000  |
| 6                                 | -1.857048000 | 1.394481000  | 0.101874000  | 6                                 | -2.033959000 | 1.091907000  | 0.092276000  |
| 6                                 | -2.000672000 | -1.020441000 | -0.177698000 | 6                                 | -1.716115000 | -1.310715000 | -0.174068000 |
| 6                                 | -0.967419000 | 2.597687000  | 0.274943000  | 6                                 | -1.336967000 | 2.418651000  | 0.252689000  |
| 6                                 | -1.225708000 | -2.290699000 | -0.449133000 | 6                                 | -0.674319000 | -2.370102000 | -0.457520000 |
| 6                                 | -3.261190000 | 1.474439000  | 0.095719000  | 6                                 | -3.426791000 | 0.914254000  | 0.060779000  |
| 6                                 | -3.401000000 | -0.949713000 | -0.148210000 | 6                                 | -3.105670000 | -1.503193000 | -0.180331000 |
| 1                                 | -3.766717000 | 2.441371000  | 0.191350000  | 1                                 | -4.110459000 | 1.767668000  | 0.130211000  |

|                            |              |              |              |                            |              |              |              |
|----------------------------|--------------|--------------|--------------|----------------------------|--------------|--------------|--------------|
| 1                          | -4.012717000 | -1.853686000 | -0.244070000 | 1                          | -3.542068000 | -2.501383000 | -0.297465000 |
| 6                          | -4.026437000 | 0.302348000  | -0.014161000 | 6                          | -3.952929000 | -0.385414000 | -0.055818000 |
| 1                          | -1.725727000 | -3.200987000 | -0.061575000 | 1                          | -0.922831000 | -3.369857000 | -0.051049000 |
| 1                          | -1.107333000 | -2.426041000 | -1.539031000 | 1                          | -0.556080000 | -2.484378000 | -1.549508000 |
| 1                          | -1.363739000 | 3.517822000  | -0.183472000 | 1                          | -1.837836000 | 3.244062000  | -0.286350000 |
| 6                          | 1.793509000  | 3.220135000  | 0.560678000  | 6                          | 0.835097000  | 3.447703000  | 0.041439000  |
| 1                          | 1.705847000  | 2.895533000  | 1.606019000  | 1                          | 0.991730000  | 3.513786000  | 1.132303000  |
| 1                          | 2.819421000  | 3.054094000  | 0.206812000  | 1                          | 1.797835000  | 3.308310000  | -0.463209000 |
| 1                          | 1.529628000  | 4.282145000  | 0.450349000  | 1                          | 0.341091000  | 4.364777000  | -0.326117000 |
| 6                          | 0.115783000  | -2.528111000 | 1.577824000  | 6                          | 0.777234000  | -2.356254000 | 1.511982000  |
| 1                          | -0.586323000 | -1.846332000 | 2.073537000  | 1                          | -0.048368000 | -1.893016000 | 2.065817000  |
| 1                          | -0.218661000 | -3.575755000 | 1.721002000  | 1                          | 0.711627000  | -3.459801000 | 1.595465000  |
| 1                          | 1.112326000  | -2.395426000 | 2.018098000  | 1                          | 1.729236000  | -2.006726000 | 1.930057000  |
| 6                          | 1.046571000  | -3.186366000 | -0.557957000 | 6                          | 1.744358000  | -2.666428000 | -0.685742000 |
| 1                          | 2.045648000  | -3.157277000 | -0.103656000 | 1                          | 2.725019000  | -2.436292000 | -0.250253000 |
| 1                          | 0.633090000  | -4.211243000 | -0.468308000 | 1                          | 1.573493000  | -3.760978000 | -0.651366000 |
| 1                          | 1.136013000  | -2.923747000 | -1.621775000 | 1                          | 1.732864000  | -2.328121000 | -1.731402000 |
| 1                          | -5.117897000 | 0.365038000  | 0.000906000  | 1                          | -5.036893000 | -0.527644000 | -0.065149000 |
| 6                          | -1.210229000 | 0.144102000  | -0.044195000 | 6                          | -1.177721000 | -0.019853000 | -0.012208000 |
| 1                          | -0.749591000 | 2.793032000  | 1.338624000  | 1                          | -1.245859000 | 2.698629000  | 1.320984000  |
| 7                          | 0.172039000  | -2.198271000 | 0.125389000  | 7                          | 0.691111000  | -1.943849000 | 0.078576000  |
| SCS                        |              |              |              | OCS                        |              |              |              |
| E(RB-P86) = -1393.47168064 |              |              |              | E(RB-P86) = -1070.43648602 |              |              |              |
| 16                         | -0.569509000 | -2.214772000 | -0.597155000 | 8                          | 0.134315000  | 2.251425000  | -0.391694000 |
| 8                          | -3.938254000 | 0.101884000  | 0.094801000  | 8                          | 3.925762000  | 0.549894000  | 0.135091000  |
| 6                          | -2.769857000 | 0.087665000  | 0.020207000  | 6                          | 2.761338000  | 0.436023000  | 0.065875000  |
| 44                         | -0.849467000 | 0.034816000  | -0.019777000 | 44                         | 0.849071000  | 0.202357000  | 0.039410000  |
| 1                          | -0.882106000 | -0.301465000 | 1.501129000  | 1                          | 0.874385000  | 0.369689000  | 1.588607000  |
| 6                          | 1.933444000  | -1.281718000 | 0.033125000  | 6                          | -1.981948000 | 1.136877000  | -0.029287000 |
| 6                          | 2.024226000  | 1.144748000  | -0.000395000 | 6                          | -1.832630000 | -1.290266000 | 0.066326000  |
| 6                          | 1.118374000  | -2.544142000 | 0.136950000  | 6                          | -1.254791000 | 2.454010000  | 0.031890000  |
| 6                          | 1.318802000  | 2.476493000  | -0.074296000 | 6                          | -0.968226000 | -2.526091000 | 0.102498000  |
| 6                          | 3.337140000  | -1.336217000 | -0.000284000 | 6                          | -3.380906000 | 1.058072000  | -0.099273000 |
| 6                          | 3.428967000  | 1.089561000  | 0.013776000  | 6                          | -3.236287000 | -1.371209000 | 0.028144000  |
| 1                          | 3.854579000  | -2.301406000 | -0.005194000 | 1                          | -3.992428000 | 1.964153000  | -0.171784000 |
| 1                          | 4.019159000  | 2.012200000  | 0.017896000  | 1                          | -3.740219000 | -2.343354000 | 0.055208000  |
| 6                          | 4.083592000  | -0.149723000 | 0.001628000  | 6                          | -4.003985000 | -0.199651000 | -0.059780000 |
| 1                          | 1.815112000  | 3.261414000  | 0.518316000  | 1                          | -1.274047000 | -3.248533000 | 0.876392000  |
| 1                          | 1.232759000  | 2.831283000  | -1.115520000 | 1                          | -0.956324000 | -3.049232000 | -0.867953000 |
| 1                          | 1.572539000  | -3.403968000 | -0.380784000 | 1                          | -1.700289000 | 3.224512000  | -0.624422000 |
| 6                          | -1.587358000 | -3.377591000 | 0.399418000  | 6                          | 0.950136000  | 3.412043000  | -0.130921000 |
| 1                          | -1.493261000 | -3.143764000 | 1.467840000  | 1                          | 1.035338000  | 3.589339000  | 0.955207000  |
| 1                          | -2.627679000 | -3.234297000 | 0.079631000  | 1                          | 1.939858000  | 3.203002000  | -0.552358000 |
| 1                          | -1.274677000 | -4.410852000 | 0.189780000  | 1                          | 0.506359000  | 4.293880000  | -0.625450000 |
| 6                          | -1.285409000 | 3.461193000  | -0.584325000 | 6                          | 1.644044000  | -2.995155000 | -0.900870000 |
| 1                          | -0.908375000 | 4.478815000  | -0.405279000 | 1                          | 1.465888000  | -4.071171000 | -0.756914000 |
| 1                          | -1.134910000 | 3.169998000  | -1.633187000 | 1                          | 1.269348000  | -2.664242000 | -1.879526000 |
| 1                          | -2.354444000 | 3.416966000  | -0.338229000 | 1                          | 2.718861000  | -2.785048000 | -0.823478000 |
| 1                          | 5.176057000  | -0.190857000 | -0.003202000 | 1                          | -5.094271000 | -0.267599000 | -0.102067000 |
| 6                          | 1.240336000  | -0.040390000 | 0.013683000  | 6                          | -1.186624000 | -0.030728000 | 0.047186000  |
| 1                          | 0.934611000  | -2.818116000 | 1.189514000  | 1                          | -1.230897000 | 2.845668000  | 1.068259000  |
| 16                         | -0.436762000 | 2.284010000  | 0.551665000  | 16                         | 0.829873000  | -2.054929000 | 0.465521000  |
| PCS                        |              |              |              | OCO                        |              |              |              |
| E(RB-P86) = -1376.57814410 |              |              |              | E(RB-P86) = -747.390625625 |              |              |              |
| 15                         | -1.684807000 | 1.320487000  | -0.036657000 | 8                          | -0.423347000 | -2.098716000 | -0.324913000 |
| 8                          | -3.141310000 | -2.467449000 | 0.194174000  | 8                          | -3.984925000 | 0.035602000  | 0.014401000  |
| 6                          | -2.171358000 | -1.810800000 | 0.190060000  | 6                          | -2.811097000 | 0.021793000  | -0.029087000 |
| 44                         | -0.622271000 | -0.685560000 | 0.129897000  | 44                         | -0.885661000 | 0.004181000  | -0.012532000 |
| 1                          | -0.694617000 | -0.752610000 | -1.427976000 | 1                          | -0.965348000 | -0.097400000 | 1.538926000  |
| 6                          | 0.953765000  | 1.960531000  | -0.343562000 | 6                          | 1.813943000  | -1.242679000 | 0.040168000  |
| 6                          | 2.346833000  | 0.109618000  | 0.390270000  | 6                          | 1.857326000  | 1.193803000  | 0.008322000  |
| 6                          | -0.408733000 | 2.466823000  | -0.778404000 | 6                          | 0.930634000  | -2.457157000 | 0.146947000  |
| 6                          | 2.488463000  | -1.325004000 | 0.848929000  | 6                          | 1.036510000  | 2.458896000  | -0.048630000 |
| 6                          | 2.080399000  | 2.800257000  | -0.356744000 | 6                          | 3.215310000  | -1.277699000 | -0.015454000 |

|    |              |              |              |   |              |              |              |
|----|--------------|--------------|--------------|---|--------------|--------------|--------------|
| 6  | 3.476382000  | 0.945848000  | 0.350547000  | 6 | 3.261342000  | 1.169725000  | -0.024499000 |
| 1  | 1.981758000  | 3.850714000  | -0.651009000 | 1 | 3.760265000  | -2.227780000 | -0.033451000 |
| 1  | 4.464550000  | 0.553927000  | 0.615685000  | 1 | 3.844146000  | 2.097186000  | -0.048656000 |
| 6  | 3.341454000  | 2.292673000  | -0.014323000 | 6 | 3.930781000  | -0.066537000 | -0.037614000 |
| 1  | 3.453620000  | -1.780629000 | 0.572674000  | 1 | 1.339555000  | 3.206166000  | 0.709148000  |
| 1  | 2.382073000  | -1.418701000 | 1.943297000  | 1 | 1.098641000  | 2.935714000  | -1.047584000 |
| 1  | -0.590359000 | 3.521906000  | -0.509143000 | 1 | 1.275462000  | -3.311725000 | -0.463271000 |
| 6  | -3.197180000 | 1.557464000  | -1.071273000 | 6 | -1.383412000 | -3.132761000 | -0.016732000 |
| 1  | -3.010977000 | 1.155132000  | -2.077452000 | 1 | -1.530603000 | -3.209819000 | 1.074045000  |
| 1  | -4.032247000 | 0.996078000  | -0.626642000 | 1 | -2.322465000 | -2.842177000 | -0.500788000 |
| 1  | -3.472922000 | 2.621787000  | -1.145371000 | 1 | -1.026208000 | -4.094860000 | -0.423625000 |
| 6  | -2.148778000 | 2.161146000  | 1.551929000  | 6 | -1.258860000 | 3.220392000  | -0.084956000 |
| 1  | -2.901918000 | 1.559152000  | 2.081453000  | 1 | -0.917312000 | 4.124021000  | 0.450140000  |
| 1  | -1.254054000 | 2.239129000  | 2.187174000  | 1 | -1.296693000 | 3.420558000  | -1.171235000 |
| 1  | -2.552462000 | 3.170269000  | 1.368438000  | 1 | -2.250101000 | 2.923593000  | 0.275656000  |
| 6  | 1.696311000  | -2.562695000 | -1.550990000 | 1 | 5.023154000  | -0.086529000 | -0.071673000 |
| 1  | 1.902651000  | -1.568467000 | -1.967779000 | 6 | 1.130341000  | -0.010878000 | 0.048733000  |
| 1  | 2.591555000  | -3.201152000 | -1.572639000 | 1 | 0.832609000  | -2.787316000 | 1.199623000  |
| 1  | 0.882377000  | -3.039620000 | -2.111590000 | 8 | -0.370842000 | 2.126239000  | 0.203130000  |
| 1  | 4.219706000  | 2.943726000  | -0.038083000 |   |              |              |              |
| 6  | 1.054260000  | 0.592980000  | 0.043898000  |   |              |              |              |
| 1  | -0.518017000 | 2.385006000  | -1.875777000 |   |              |              |              |
| 16 | 1.116304000  | -2.391986000 | 0.184607000  |   |              |              |              |

### Water coordinated reactants

| PNN-R<br>E(RB-P86) = -1165.52860041 |              |              |              | NNN-R<br>E(RB-P86) = -878.832154123 |              |              |              |
|-------------------------------------|--------------|--------------|--------------|-------------------------------------|--------------|--------------|--------------|
| 15                                  | -2.227093000 | 0.206852000  | -0.128274000 | 7                                   | -2.240642000 | -0.026959000 | -0.192435000 |
| 8                                   | -0.803493000 | -1.989841000 | 2.536670000  | 8                                   | -0.605634000 | -1.919681000 | 2.667876000  |
|                                     | -0.561372000 | -1.538421000 | 1.475609000  | 6                                   | -0.449533000 | -1.495611000 | 1.576627000  |
| 44                                  | -0.200016000 | -0.893312000 | -0.171570000 | 44                                  | -0.202044000 | -0.866413000 | -0.082278000 |
| 7                                   | 2.068096000  | -1.226802000 | -0.083072000 | 7                                   | 2.035321000  | -0.861901000 | 0.014172000  |
| 1                                   | -0.719143000 | -2.376003000 | -0.631443000 | 1                                   | -0.531934000 | -2.455334000 | -0.482811000 |
| 7                                   | 0.548750000  | 1.097213000  | 0.040957000  | 7                                   | 0.204591000  | 1.143263000  | -0.011437000 |
| 6                                   | -0.342757000 | 2.150495000  | 0.274821000  | 6                                   | -0.883343000 | 1.991299000  | 0.215881000  |
| 6                                   | 1.889385000  | 1.288030000  | -0.010841000 | 6                                   | 1.479644000  | 1.584612000  | -0.123911000 |
| 6                                   | -1.717064000 | 1.879515000  | 0.221691000  | 6                                   | -2.126066000 | 1.392616000  | 0.219823000  |
| 6                                   | 2.663042000  | 0.083519000  | -0.516457000 | 6                                   | 2.421084000  | 0.483392000  | -0.568779000 |
| 6                                   | 0.243044000  | 3.442422000  | 0.539329000  | 6                                   | -0.568546000 | 3.390254000  | 0.418175000  |
| 6                                   | 2.482357000  | 2.518071000  | 0.247612000  | 6                                   | 1.813669000  | 2.916920000  | 0.055659000  |
| 1                                   | -0.419764000 | 4.286295000  | 0.744876000  | 1                                   | -1.377916000 | 4.095321000  | 0.622128000  |
| 1                                   | 3.565648000  | 2.642828000  | 0.209874000  | 1                                   | 2.843357000  | 3.265462000  | -0.033459000 |
| 6                                   | 1.612724000  | 3.607519000  | 0.538108000  | 6                                   | 0.737890000  | 3.818960000  | 0.346514000  |
| 1                                   | 2.037438000  | 4.592745000  | 0.753109000  | 1                                   | 0.961423000  | 4.878546000  | 0.502582000  |
| 1                                   | 2.630656000  | 0.092247000  | -1.619133000 | 1                                   | 2.341262000  | 0.377347000  | -1.663327000 |
| 1                                   | 3.727946000  | 0.136257000  | -0.216999000 | 1                                   | 3.474472000  | 0.709520000  | -0.317379000 |
| 1                                   | -2.442848000 | 2.677456000  | 0.398479000  | 1                                   | -3.065386000 | 1.927079000  | 0.375693000  |
| 8                                   | 0.173520000  | -0.402166000 | -2.422470000 | 8                                   | 0.269916000  | -1.088261000 | -2.590847000 |
| 1                                   | -0.045239000 | 0.544604000  | -2.512762000 | 1                                   | -0.460114000 | -0.767625000 | -3.148130000 |
| 1                                   | -0.546629000 | -0.890923000 | -2.859847000 | 1                                   | -0.085401000 | -1.899155000 | -2.134482000 |
| 6                                   | 2.549999000  | -2.311615000 | -0.971967000 | 6                                   | 2.726004000  | -1.938704000 | -0.742979000 |
| 1                                   | 3.657600000  | -2.378921000 | -0.959857000 | 1                                   | 3.826209000  | -1.814249000 | -0.686159000 |
| 1                                   | 2.208638000  | -2.118086000 | -1.997963000 | 1                                   | 2.409644000  | -1.905492000 | -1.793304000 |
| 6                                   | 2.495404000  | -1.506864000 | 1.313048000  | 6                                   | 2.492099000  | -0.903844000 | 1.432390000  |
| 1                                   | 2.169016000  | -0.686561000 | 1.965836000  | 1                                   | 2.020211000  | -0.085763000 | 1.991564000  |
| 1                                   | 2.034072000  | -2.441263000 | 1.657846000  | 1                                   | 2.202265000  | -1.861885000 | 1.882111000  |
| 6                                   | -3.263142000 | 0.229523000  | -1.683934000 | 6                                   | -2.725844000 | -0.087466000 | -1.608684000 |
| 6                                   | -3.528981000 | -0.273314000 | 1.097507000  | 6                                   | -3.247204000 | -0.722058000 | 0.662148000  |
| 1                                   | -4.349762000 | 0.461679000  | 1.080919000  | 1                                   | -4.233320000 | -0.230285000 | 0.556006000  |
| 1                                   | -3.088297000 | -0.298062000 | 2.103050000  | 1                                   | -2.929036000 | -0.664960000 | 1.709327000  |
| 1                                   | -3.926649000 | -1.271296000 | 0.857183000  | 1                                   | -3.324860000 | -1.775178000 | 0.356526000  |
| 1                                   | -2.662427000 | 0.577477000  | -2.538333000 | 1                                   | -2.029062000 | 0.478635000  | -2.243017000 |
| 1                                   | -4.109208000 | 0.926101000  | -1.564141000 | 1                                   | -3.720944000 | 0.388621000  | -1.686707000 |
| 1                                   | -3.651830000 | -0.778189000 | -1.899581000 | 1                                   | -2.799688000 | -1.135096000 | -1.940715000 |
| 1                                   | 2.124949000  | -3.264999000 | -0.631508000 | 1                                   | 2.447156000  | -2.908644000 | -0.310406000 |



|                            |              |              |              |                            |              |              |              |
|----------------------------|--------------|--------------|--------------|----------------------------|--------------|--------------|--------------|
| 1                          | 3.598940000  | -1.600521000 | 1.367632000  | 1                          | 3.593324000  | -0.794184000 | 1.478678000  |
| PNP-R                      |              |              |              | SNS-R                      |              |              |              |
| E(RB-P86) = -1452.19956629 |              |              |              | E(RB-P86) = -1485.98725837 |              |              |              |
| 15                         | -2.376400000 | -0.392042000 | -0.113113000 | 16                         | -2.022539000 | -1.453929000 | 0.085288000  |
| 8                          | -0.204212000 | -2.084117000 | 2.556032000  | 8                          | 0.431797000  | -1.769634000 | 2.955043000  |
| 6                          | -0.152142000 | -1.604715000 | 1.483816000  | 6                          | 0.380310000  | -1.431043000 | 1.834624000  |
| 44                         | -0.067850000 | -0.907121000 | -0.186806000 | 44                         | 0.321214000  | -0.940739000 | 0.088351000  |
| 15                         | 2.267045000  | -0.738844000 | -0.101940000 | 16                         | 2.418386000  | 0.121879000  | 0.286846000  |
| 1                          | -0.211451000 | -2.459578000 | -0.637353000 | 1                          | 0.842099000  | -2.462232000 | -0.160816000 |
| 7                          | 0.098670000  | 1.288081000  | 0.016769000  | 7                          | -0.401564000 | 1.093626000  | -0.006634000 |
| 6                          | -1.088043000 | 2.013645000  | 0.217419000  | 6                          | -1.781776000 | 1.296204000  | 0.120917000  |
| 6                          | 1.309582000  | 1.920704000  | 0.033843000  | 6                          | 0.466085000  | 2.146459000  | -0.006016000 |
| 6                          | -2.329234000 | 1.362806000  | 0.131597000  | 6                          | -2.646073000 | 0.202225000  | 0.105748000  |
| 6                          | 2.516326000  | 1.097468000  | -0.384237000 | 6                          | 1.908089000  | 1.822465000  | -0.327801000 |
| 6                          | -0.968693000 | 3.423074000  | 0.498661000  | 6                          | -2.242009000 | 2.657272000  | 0.277828000  |
| 6                          | 1.446547000  | 3.274812000  | 0.322868000  | 6                          | 0.053660000  | 3.459671000  | 0.174127000  |
| 1                          | -1.882537000 | 3.995714000  | 0.672983000  | 1                          | -3.314259000 | 2.837518000  | 0.382478000  |
| 1                          | 2.431956000  | 3.743062000  | 0.330912000  | 1                          | 0.774272000  | 4.278414000  | 0.180781000  |
| 6                          | 0.266792000  | 4.026678000  | 0.566138000  | 6                          | -1.344241000 | 3.698213000  | 0.317101000  |
| 1                          | 0.340733000  | 5.093609000  | 0.797559000  | 1                          | -1.705284000 | 4.721553000  | 0.454794000  |
| 1                          | 2.659404000  | 1.210651000  | -1.475142000 | 1                          | 2.051638000  | 1.794180000  | -1.421189000 |
| 1                          | 3.437925000  | 1.464479000  | 0.096953000  | 1                          | 2.594436000  | 2.569704000  | 0.096462000  |
| 1                          | -3.244468000 | 1.942070000  | 0.283127000  | 1                          | -3.710289000 | 0.314783000  | 0.313587000  |
| 8                          | 0.019269000  | -0.239124000 | -2.413907000 | 8                          | 0.392217000  | -0.511748000 | -2.200480000 |
| 1                          | -0.381491000 | 0.650945000  | -2.360425000 | 1                          | -0.282136000 | 0.193258000  | -2.266502000 |
| 1                          | -0.614173000 | -0.795557000 | -2.900199000 | 1                          | 0.038338000  | -1.282012000 | -2.678766000 |
| 6                          | 3.423909000  | -1.502288000 | -1.330553000 | 6                          | 3.557471000  | -0.339818000 | -1.080284000 |
| 1                          | 4.444730000  | -1.095774000 | -1.241528000 | 1                          | 4.403883000  | 0.361923000  | -1.107345000 |
| 1                          | 3.042174000  | -1.317441000 | -2.345244000 | 1                          | 3.920337000  | -1.349140000 | -0.846396000 |
| 6                          | 3.119524000  | -1.059640000 | 1.505797000  | 6                          | -2.517203000 | -2.110477000 | -1.589745000 |
| 1                          | 2.618870000  | -0.485447000 | 2.298602000  | 1                          | -2.239678000 | -1.412542000 | -2.392801000 |
| 1                          | 3.042701000  | -2.127903000 | 1.756465000  | 1                          | -3.609133000 | -2.234246000 | -1.589004000 |
| 6                          | -3.444785000 | -0.746193000 | -1.603356000 | 1                          | -2.033693000 | -3.089561000 | -1.720972000 |
| 6                          | -3.431091000 | -1.151365000 | 1.209288000  | 1                          | 3.015462000  | -0.347612000 | -2.034959000 |
| 1                          | -4.428261000 | -0.682372000 | 1.216021000  |                            |              |              |              |
| 1                          | -2.953065000 | -0.991998000 | 2.185281000  |                            |              |              |              |
| 1                          | -3.537684000 | -2.233683000 | 1.037273000  |                            |              |              |              |
| 1                          | -2.998552000 | -0.304362000 | -2.507746000 |                            |              |              |              |
| 1                          | -4.442821000 | -0.297344000 | -1.469814000 |                            |              |              |              |
| 1                          | -3.553655000 | -1.832574000 | -1.747384000 |                            |              |              |              |
| 1                          | 3.450564000  | -2.589626000 | -1.165174000 |                            |              |              |              |
| 1                          | 4.181528000  | -0.770822000 | 1.457995000  |                            |              |              |              |
| SNN-R                      |              |              |              | ONP-R                      |              |              |              |
| E(RB-P86) = -1182.41620005 |              |              |              | E(RB-P86) = -1146.06512757 |              |              |              |
| 16                         | -2.286133000 | -0.905463000 | 0.291997000  | 8                          | -1.592499000 | -1.933040000 | -0.402603000 |
| 8                          | 0.338727000  | -2.120832000 | 2.679896000  | 8                          | 1.612258000  | -2.112524000 | 2.174032000  |
| 6                          | 0.232191000  | -1.647557000 | 1.607862000  | 6                          | 1.146612000  | -1.623163000 | 1.210890000  |
| 44                         | 0.064763000  | -0.969414000 | -0.057479000 | 44                         | 0.443637000  | -0.909572000 | -0.306290000 |
| 7                          | 2.193344000  | -0.317714000 | -0.231648000 | 15                         | 1.896507000  | 0.790225000  | -0.189668000 |
| 1                          | 0.205835000  | -2.550494000 | -0.459276000 | 1                          | 1.371833000  | -2.000437000 | -1.077424000 |
| 7                          | -0.140216000 | 1.133636000  | 0.029899000  | 7                          | -0.920656000 | 0.639257000  | 0.342538000  |
| 6                          | -1.374350000 | 1.695537000  | 0.363807000  | 6                          | -2.243164000 | 0.394733000  | 0.020247000  |
| 6                          | 0.968684000  | 1.888198000  | -0.171432000 | 6                          | -0.494591000 | 1.862123000  | 0.748734000  |
| 6                          | -2.479604000 | 0.854350000  | 0.473645000  | 6                          | -2.522863000 | -0.835495000 | -0.634663000 |
| 6                          | 2.128065000  | 1.099873000  | -0.751558000 | 6                          | 0.999489000  | 1.963982000  | 0.985141000  |
| 6                          | -1.395644000 | 3.125817000  | 0.572933000  | 6                          | -3.188977000 | 1.455304000  | 0.206576000  |
| 6                          | 0.982270000  | 3.262095000  | 0.021039000  | 6                          | -1.379208000 | 2.927591000  | 0.912169000  |
| 1                          | -2.335904000 | 3.603195000  | 0.858364000  | 1                          | -4.244916000 | 1.274805000  | -0.007872000 |
| 1                          | 1.887829000  | 3.849621000  | -0.137004000 | 1                          | -1.023981000 | 3.904281000  | 1.243721000  |
| 6                          | -0.247373000 | 3.871279000  | 0.415216000  | 6                          | -2.751985000 | 2.692223000  | 0.645651000  |
| 1                          | -0.280514000 | 4.951566000  | 0.584903000  | 1                          | -3.475341000 | 3.499710000  | 0.792889000  |
| 1                          | 1.984928000  | 1.023847000  | -1.842313000 | 1                          | 1.358938000  | 3.002564000  | 0.902620000  |
| 1                          | 3.095027000  | 1.607748000  | -0.576227000 | 1                          | 1.243120000  | 1.602575000  | 2.001205000  |
| 1                          | -3.441446000 | 1.199865000  | 0.852496000  | 1                          | -3.553770000 | -1.179978000 | -0.758656000 |
| 8                          | -0.062185000 | -0.472858000 | -2.346275000 | 8                          | -0.445443000 | -0.285046000 | -2.306886000 |

|                                     |              |              |              |                                     |              |              |              |
|-------------------------------------|--------------|--------------|--------------|-------------------------------------|--------------|--------------|--------------|
| 1                                   | -0.663064000 | 0.295042000  | -2.390607000 | 1                                   | -1.436710000 | -0.384024000 | -2.004464000 |
| 1                                   | -0.551054000 | -1.227322000 | -2.720460000 | 1                                   | -0.277275000 | -1.042067000 | -2.895017000 |
| 6                                   | 2.993608000  | -1.149576000 | -1.167464000 | 6                                   | 2.113719000  | 1.760685000  | -1.744089000 |
| 1                                   | 4.013994000  | -0.734238000 | -1.292925000 | 1                                   | 2.712679000  | 1.170743000  | -2.453272000 |
| 1                                   | 2.488895000  | -1.183043000 | -2.141900000 | 1                                   | 2.617396000  | 2.720349000  | -1.546036000 |
| 6                                   | 2.862732000  | -0.298316000 | 1.099106000  | 6                                   | 3.600472000  | 0.672547000  | 0.500756000  |
| 1                                   | 2.294631000  | 0.346450000  | 1.782192000  | 1                                   | 3.567507000  | 0.164222000  | 1.474961000  |
| 1                                   | 2.893002000  | -1.315725000 | 1.508563000  | 1                                   | 4.218191000  | 0.070218000  | -0.181457000 |
| 6                                   | -3.205779000 | -1.286484000 | -1.285157000 | 6                                   | -1.975349000 | -2.782235000 | 0.709028000  |
| 1                                   | -2.872045000 | -0.645544000 | -2.113931000 | 1                                   | -2.971728000 | -3.210300000 | 0.507098000  |
| 1                                   | -4.273729000 | -1.103307000 | -1.100933000 | 1                                   | -1.998272000 | -2.205644000 | 1.648443000  |
| 1                                   | -3.045950000 | -2.350458000 | -1.513362000 | 1                                   | -1.228884000 | -3.585986000 | 0.771105000  |
| 1                                   | 3.059563000  | -2.168768000 | -0.765682000 | 1                                   | 1.125946000  | 1.937030000  | -2.192039000 |
| 1                                   | 3.895545000  | 0.089969000  | 1.000522000  | 1                                   | 4.052742000  | 1.670054000  | 0.619216000  |
| ONS-R<br>E(RB-P86) = -1162.94795987 |              |              |              | ONN-R<br>E(RB-P86) = -859.371281304 |              |              |              |
| 8                                   | -0.580890000 | -2.125710000 | -0.682660000 | 8                                   | -0.479811000 | -2.217440000 | -0.493867000 |
| 8                                   | 1.418385000  | -1.592594000 | 2.644973000  | 8                                   | 1.905375000  | -1.307564000 | 2.434751000  |
| 6                                   | 1.188017000  | -1.170953000 | 1.573042000  | 6                                   | 1.481777000  | -0.952960000 | 1.391176000  |
| 44                                  | 0.834819000  | -0.550104000 | -0.089916000 | 44                                  | 0.831890000  | -0.463009000 | -0.214243000 |
| 16                                  | 1.702681000  | 1.511404000  | 0.463086000  | 7                                   | 1.313336000  | 1.652980000  | -0.011906000 |
| 1                                   | 2.239201000  | -1.301207000 | -0.464923000 | 1                                   | 2.290893000  | -1.036490000 | -0.733099000 |
| 7                                   | -1.018742000 | 0.459337000  | -0.026520000 | 7                                   | -1.063320000 | 0.324380000  | 0.021804000  |
| 6                                   | -2.146072000 | -0.376651000 | -0.112038000 | 6                                   | -2.124275000 | -0.576687000 | 0.155137000  |
| 6                                   | -1.130462000 | 1.782290000  | 0.280225000  | 6                                   | -1.221308000 | 1.666923000  | 0.069754000  |
| 6                                   | -1.932259000 | -1.704691000 | -0.401941000 | 6                                   | -1.819498000 | -1.906610000 | -0.032939000 |
| 6                                   | 0.154004000  | 2.575813000  | 0.186272000  | 6                                   | 0.032077000  | 2.393598000  | -0.380431000 |
| 6                                   | -3.443001000 | 0.232942000  | 0.110231000  | 6                                   | -3.419912000 | 0.000937000  | 0.457706000  |
| 6                                   | -2.350971000 | 2.379647000  | 0.549262000  | 6                                   | -2.441733000 | 2.255496000  | 0.358360000  |
| 1                                   | -4.341086000 | -0.384317000 | 0.032175000  | 1                                   | -4.281641000 | -0.656183000 | 0.597177000  |
| 1                                   | -2.420206000 | 3.440825000  | 0.791016000  | 1                                   | -2.563191000 | 3.338629000  | 0.397740000  |
| 6                                   | -3.524976000 | 1.561514000  | 0.444723000  | 6                                   | -3.550701000 | 1.366478000  | 0.567139000  |
| 1                                   | -4.505061000 | 2.009750000  | 0.631528000  | 1                                   | -4.531554000 | 1.789253000  | 0.803672000  |
| 1                                   | 0.265660000  | 2.996991000  | -0.826622000 | 1                                   | 0.016901000  | 2.446015000  | -1.481892000 |
| 1                                   | 0.182449000  | 3.400214000  | 0.913814000  | 1                                   | 0.083631000  | 3.426864000  | 0.008612000  |
| 1                                   | -2.690279000 | -2.465611000 | -0.572895000 | 1                                   | -2.503417000 | -2.751834000 | -0.028007000 |
| 8                                   | 0.529697000  | 0.041400000  | -2.344083000 | 8                                   | 0.286892000  | -0.107635000 | -2.500836000 |
| 1                                   | -0.433072000 | 0.215229000  | -2.297283000 | 1                                   | -0.647730000 | -0.389955000 | -2.526025000 |
| 1                                   | 0.620065000  | -0.804653000 | -2.820532000 | 1                                   | 0.792346000  | -0.851692000 | -2.877779000 |
| 6                                   | 2.736295000  | 2.179966000  | -0.906723000 | 6                                   | 2.406877000  | 2.099274000  | -0.917658000 |
| 1                                   | 2.897719000  | 3.256383000  | -0.747169000 | 1                                   | 2.541070000  | 3.197968000  | -0.858390000 |
| 1                                   | 3.694428000  | 1.647108000  | -0.851117000 | 1                                   | 2.159293000  | 1.811904000  | -1.947704000 |
| 6                                   | -0.338104000 | -3.503574000 | -0.301979000 | 6                                   | 1.668375000  | 2.012904000  | 1.391553000  |
| 1                                   | -0.478525000 | -3.626629000 | 0.783463000  | 1                                   | 0.841725000  | 1.732015000  | 2.056580000  |
| 1                                   | 0.696977000  | -3.727509000 | -0.586590000 | 1                                   | 2.572728000  | 1.468075000  | 1.688945000  |
| 1                                   | -1.038577000 | -4.154950000 | -0.851752000 | 6                                   | -0.045677000 | -3.536515000 | -0.082296000 |
| 1                                   | 2.254231000  | 1.982555000  | -1.872825000 | 1                                   | -0.751395000 | -4.286977000 | -0.478357000 |
| ONO-R<br>E(RB-P86) = -839.903274927 |              |              |              | PNS-R<br>E(RB-P86) = -1469.09781894 |              |              |              |
| 8                                   | 0.790740000  | -1.965606000 | -0.573944000 | 15                                  | -2.227396000 | 0.119129000  | -0.266813000 |
| 8                                   | 2.131451000  | -0.135739000 | 2.599881000  | 8                                   | -0.911329000 | -1.658751000 | 2.790841000  |
| 6                                   | 1.682691000  | -0.030088000 | 1.516315000  | 6                                   | -0.620031000 | -1.357743000 | 1.694223000  |
| 44                                  | 0.995279000  | 0.127517000  | -0.142286000 | 44                                  | -0.172503000 | -0.933446000 | -0.010482000 |
| 8                                   | 0.268406000  | 2.164932000  | 0.194092000  | 16                                  | 2.164908000  | -1.389879000 | 0.418598000  |
| 1                                   | 2.571438000  | 0.353470000  | -0.578489000 | 1                                   | -0.686445000 | -2.443175000 | -0.330920000 |
| 7                                   | -1.046677000 | -0.127972000 | 0.029061000  | 7                                   | 0.544441000  | 1.129273000  | 0.021415000  |
| 6                                   | -1.497731000 | -1.451650000 | 0.021578000  | 6                                   | -0.415415000 | 2.153559000  | 0.037435000  |
| 6                                   | -1.864911000 | 0.928494000  | 0.216450000  | 6                                   | 1.870180000  | 1.413294000  | 0.146169000  |
| 6                                   | -0.544231000 | -2.419041000 | -0.213958000 | 6                                   | -1.769362000 | 1.828944000  | -0.134060000 |
| 6                                   | -1.185036000 | 2.270547000  | 0.017240000  | 6                                   | 2.838984000  | 0.276829000  | -0.099822000 |
| 6                                   | -2.913922000 | -1.651314000 | 0.254405000  | 6                                   | 0.059449000  | 3.502273000  | 0.226381000  |
| 6                                   | -3.220566000 | 0.777738000  | 0.468284000  | 6                                   | 2.348971000  | 2.700601000  | 0.366452000  |

|                            |              |              |              |                            |              |              |              |
|----------------------------|--------------|--------------|--------------|----------------------------|--------------|--------------|--------------|
| 1                          | -3.321240000 | -2.664879000 | 0.257159000  | 1                          | -0.672491000 | 4.312967000  | 0.246350000  |
| 1                          | -3.873590000 | 1.635366000  | 0.634241000  | 1                          | 3.417977000  | 2.888775000  | 0.474996000  |
| 6                          | -3.726498000 | -0.563568000 | 0.481129000  | 6                          | 1.400819000  | 3.758696000  | 0.403934000  |
| 1                          | -4.791615000 | -0.725562000 | 0.670403000  | 1                          | 1.741811000  | 4.785094000  | 0.568712000  |
| 1                          | -1.371005000 | 2.630778000  | -1.013531000 | 1                          | 3.036864000  | 0.190081000  | -1.181719000 |
| 1                          | -1.557708000 | 3.027288000  | 0.729602000  | 1                          | 3.795233000  | 0.449734000  | 0.415300000  |
| 1                          | -0.686411000 | -3.493419000 | -0.292456000 | 1                          | -2.519593000 | 2.624090000  | -0.129394000 |
| 8                          | 0.416250000  | 0.373034000  | -2.418227000 | 8                          | 0.353774000  | -0.608325000 | -2.253435000 |
| 1                          | -0.251715000 | -0.323856000 | -2.563483000 | 1                          | 0.216184000  | 0.354748000  | -2.346401000 |
| 1                          | 1.231292000  | 0.046559000  | -2.841344000 | 1                          | -0.346988000 | -1.036912000 | -2.775720000 |
| 6                          | 0.963110000  | 3.345949000  | -0.256478000 | 6                          | 2.931913000  | -2.426313000 | -0.890596000 |
| 1                          | 0.849359000  | 3.470473000  | -1.347568000 | 1                          | 4.027804000  | -2.384118000 | -0.808411000 |
| 1                          | 0.565154000  | 4.230917000  | 0.270328000  | 1                          | 2.596401000  | -2.092746000 | -1.881758000 |
| 6                          | 1.821044000  | -2.907389000 | -0.174335000 | 6                          | -3.145959000 | -0.128664000 | -1.873262000 |
| 1                          | 1.612998000  | -3.879365000 | -0.652458000 | 6                          | -3.595576000 | -0.227885000 | 0.931489000  |
| 1                          | 1.829080000  | -3.013778000 | 0.921464000  | 1                          | -4.436042000 | 0.462424000  | 0.754752000  |
| 1                          | 2.771655000  | -2.495318000 | -0.532156000 | 1                          | -3.223238000 | -0.086468000 | 1.954927000  |
| 1                          | 2.018312000  | 3.195350000  | -0.002745000 | 1                          | -3.945004000 | -1.265728000 | 0.818736000  |
|                            |              |              |              | 1                          | -2.496235000 | 0.116585000  | -2.727565000 |
|                            |              |              |              | 1                          | -4.019588000 | 0.542293000  | -1.915352000 |
|                            |              |              |              | 1                          | -3.486883000 | -1.171927000 | -1.962784000 |
|                            |              |              |              | 1                          | 2.588290000  | -3.452829000 | -0.707133000 |
| PCP-R                      |              |              |              | NCN-R                      |              |              |              |
| E(RB-P86) = -1436.13738330 |              |              |              | E(RB-P86) = -862.777983345 |              |              |              |
| 15                         | -2.285171000 | -0.540184000 | -0.178116000 | 7                          | -2.149300000 | -0.561816000 | -0.256565000 |
| 8                          | -0.187611000 | -1.877780000 | 2.686883000  | 8                          | -0.257152000 | -1.859331000 | 2.695358000  |
| 6                          | -0.106328000 | -1.502265000 | 1.573907000  | 6                          | -0.127436000 | -1.476208000 | 1.583986000  |
| 44                         | 0.012619000  | -0.948161000 | -0.147899000 | 44                         | 0.050187000  | -0.915838000 | -0.114082000 |
| 15                         | 2.317153000  | -0.519190000 | -0.013122000 | 7                          | 2.218147000  | -0.363710000 | 0.032526000  |
| 1                          | 0.044891000  | -2.585495000 | -0.638610000 | 1                          | 0.160408000  | -2.581806000 | -0.715409000 |
| 6                          | -0.008994000 | 1.187855000  | 0.094059000  | 6                          | -0.056888000 | 1.085036000  | 0.150540000  |
| 6                          | -1.194275000 | 1.879544000  | 0.470260000  | 6                          | -1.303179000 | 1.689655000  | 0.387951000  |
| 6                          | 1.149857000  | 1.967382000  | -0.172246000 | 6                          | 1.088470000  | 1.864102000  | -0.082528000 |
| 6                          | -2.427088000 | 1.052003000  | 0.788479000  | 6                          | -2.416751000 | 0.685509000  | 0.584420000  |
| 6                          | 2.415091000  | 1.249756000  | -0.611248000 | 6                          | 2.304091000  | 1.061123000  | -0.500212000 |
| 6                          | -1.220546000 | 3.282244000  | 0.561850000  | 6                          | -1.406269000 | 3.088869000  | 0.428255000  |
| 6                          | 1.122276000  | 3.369679000  | -0.059027000 | 6                          | 0.999461000  | 3.264797000  | -0.019771000 |
| 1                          | -2.142740000 | 3.799650000  | 0.848368000  | 1                          | -2.366393000 | 3.585670000  | 0.607358000  |
| 1                          | 2.025357000  | 3.955723000  | -0.262512000 | 1                          | 1.878590000  | 3.897932000  | -0.184869000 |
| 6                          | -0.060876000 | 4.026596000  | 0.303742000  | 6                          | -0.246195000 | 3.866299000  | 0.243151000  |
| 1                          | -0.079572000 | 5.117028000  | 0.386262000  | 1                          | -0.316776000 | 4.956426000  | 0.290107000  |
| 1                          | 2.466861000  | 1.191086000  | -1.714105000 | 1                          | 2.322506000  | 0.972380000  | -1.599318000 |
| 1                          | 3.337293000  | 1.749999000  | -0.266634000 | 1                          | 3.266075000  | 1.509753000  | -0.182630000 |
| 1                          | -3.373725000 | 1.584244000  | 0.589756000  | 1                          | -3.423487000 | 1.079662000  | 0.342552000  |
| 8                          | 0.302712000  | -0.787988000 | -2.505777000 | 8                          | 0.549401000  | -0.904759000 | -2.496766000 |
| 1                          | -0.516334000 | -0.444191000 | -2.903229000 | 1                          | -0.230859000 | -0.758983000 | -3.058645000 |
| 1                          | 0.152821000  | -1.755535000 | -2.365843000 | 1                          | 0.422671000  | -1.826355000 | -2.076748000 |
| 6                          | 3.607758000  | -1.400843000 | -1.005559000 | 6                          | 3.146159000  | -1.230362000 | -0.741409000 |
| 1                          | 4.589712000  | -0.905682000 | -0.927506000 | 1                          | 4.187392000  | -0.857792000 | -0.659704000 |
| 1                          | 3.295233000  | -1.425020000 | -2.059821000 | 1                          | 2.842905000  | -1.237877000 | -1.795909000 |
| 6                          | 3.066151000  | -0.460411000 | 1.673700000  | 6                          | 2.657798000  | -0.354279000 | 1.456793000  |
| 1                          | 2.467109000  | 0.215187000  | 2.300948000  | 1                          | 2.016142000  | 0.327065000  | 2.029347000  |
| 1                          | 3.044717000  | -1.462876000 | 2.125499000  | 1                          | 2.572551000  | -1.366460000 | 1.872447000  |
| 6                          | -3.058215000 | -0.092631000 | -1.808336000 | 6                          | -2.517209000 | -0.265343000 | -1.665436000 |
| 6                          | -3.551492000 | -1.663081000 | 0.564080000  | 6                          | -3.000091000 | -1.681102000 | 0.227366000  |
| 1                          | -4.543032000 | -1.184417000 | 0.611777000  | 1                          | -4.074584000 | -1.419392000 | 0.149954000  |
| 1                          | -3.230917000 | -1.942570000 | 1.578305000  | 1                          | -2.752388000 | -1.902380000 | 1.273207000  |
| 1                          | -3.615664000 | -2.581891000 | -0.037434000 | 1                          | -2.788844000 | -2.573089000 | -0.376820000 |
| 1                          | -2.504639000 | 0.750567000  | -2.251030000 | 1                          | -1.925080000 | 0.588289000  | -2.024376000 |
| 1                          | -4.107429000 | 0.216863000  | -1.675372000 | 1                          | -3.592490000 | -0.010250000 | -1.741140000 |
| 1                          | -3.032817000 | -0.952861000 | -2.495279000 | 1                          | -2.326630000 | -1.155077000 | -2.283279000 |
| 1                          | 3.692219000  | -2.436952000 | -0.645613000 | 1                          | 3.089003000  | -2.252062000 | -0.343671000 |
| 1                          | 4.106156000  | -0.099553000 | 1.632453000  | 1                          | 3.710871000  | -0.017012000 | 1.525690000  |
| 1                          | -2.431177000 | 0.757560000  | 1.854937000  | 1                          | -2.431477000 | 0.341069000  | 1.632368000  |
| PCN-R                      |              |              |              | OCP-R                      |              |              |              |

|                            |              |              |              |                            |              |              |              |
|----------------------------|--------------|--------------|--------------|----------------------------|--------------|--------------|--------------|
| E(RB-P86) = -1149.46510515 |              |              |              | E(RB-P86) = -1130.00983118 |              |              |              |
| 15                         | -2.170920000 | -0.115747000 | -0.211063000 | 8                          | -1.976498000 | -1.468656000 | -0.406506000 |
| 8                          | -0.617800000 | -1.711851000 | 2.726727000  | 8                          | 0.823928000  | -1.749503000 | 2.701349000  |
| 6                          | -0.386221000 | -1.400692000 | 1.613247000  | 6                          | 0.597256000  | -1.426127000 | 1.591759000  |
| 44                         | -0.050758000 | -0.942454000 | -0.101871000 | 44                         | 0.242478000  | -0.941820000 | -0.119471000 |
| 7                          | 2.233420000  | -0.903022000 | 0.009648000  | 15                         | 2.052136000  | 0.380461000  | -0.158945000 |
| 1                          | -0.210057000 | -2.609431000 | -0.560843000 | 1                          | 0.868792000  | -2.449555000 | -0.679927000 |
| 6                          | 0.328917000  | 1.097623000  | 0.103970000  | 6                          | -0.716150000 | 0.884400000  | 0.197427000  |
| 6                          | -0.653127000 | 2.069080000  | 0.414312000  | 6                          | -2.129503000 | 0.891742000  | 0.161535000  |
| 6                          | 1.654083000  | 1.516467000  | -0.146717000 | 6                          | -0.036830000 | 2.122676000  | 0.312893000  |
| 6                          | -2.056508000 | 1.546584000  | 0.664820000  | 6                          | -2.832535000 | -0.442206000 | 0.205979000  |
| 6                          | 2.615232000  | 0.431344000  | -0.585057000 | 6                          | 1.474161000  | 2.064858000  | 0.458341000  |
| 6                          | -0.306591000 | 3.430588000  | 0.475152000  | 6                          | -2.850300000 | 2.098628000  | 0.172274000  |
| 6                          | 2.004866000  | 2.873696000  | -0.065790000 | 6                          | -0.757106000 | 3.329812000  | 0.335582000  |
| 1                          | -1.062115000 | 4.188103000  | 0.710882000  | 1                          | -3.945301000 | 2.098743000  | 0.126633000  |
| 1                          | 3.034780000  | 3.198555000  | -0.251933000 | 1                          | -0.232881000 | 4.288218000  | 0.418193000  |
| 6                          | 1.021079000  | 3.827054000  | 0.245125000  | 6                          | -2.158947000 | 3.316489000  | 0.255880000  |
| 1                          | 1.290101000  | 4.885182000  | 0.307594000  | 1                          | -2.714062000 | 4.258440000  | 0.260832000  |
| 1                          | 2.555970000  | 0.305765000  | -1.679289000 | 1                          | 2.000766000  | 2.882749000  | -0.063566000 |
| 1                          | 3.669985000  | 0.662604000  | -0.331871000 | 1                          | 1.756573000  | 2.128226000  | 1.526026000  |
| 1                          | -2.853883000 | 2.240715000  | 0.346698000  | 1                          | -3.801655000 | -0.439960000 | -0.327341000 |
| 8                          | 0.368251000  | -1.020283000 | -2.461088000 | 8                          | -0.134680000 | -0.701558000 | -2.422998000 |
| 1                          | -0.370157000 | -0.613246000 | -2.946140000 | 1                          | -1.107974000 | -0.794061000 | -2.385870000 |
| 1                          | 0.033069000  | -1.910066000 | -2.145085000 | 1                          | 0.204918000  | -1.619449000 | -2.496056000 |
| 6                          | 2.916751000  | -1.991370000 | -0.732447000 | 6                          | 2.701923000  | 0.728889000  | -1.854331000 |
| 1                          | 4.018420000  | -1.871700000 | -0.681550000 | 1                          | 3.476219000  | 1.512309000  | -1.821471000 |
| 1                          | 2.600165000  | -1.970599000 | -1.783709000 | 1                          | 1.870060000  | 1.052711000  | -2.495081000 |
| 6                          | 2.671749000  | -0.939913000 | 1.430644000  | 6                          | 3.579196000  | 0.023182000  | 0.810564000  |
| 1                          | 2.208068000  | -0.107364000 | 1.974778000  | 1                          | 3.312799000  | -0.146274000 | 1.863668000  |
| 1                          | 2.357560000  | -1.888437000 | 1.886040000  | 1                          | 4.043727000  | -0.894010000 | 0.419973000  |
| 6                          | -2.788440000 | 0.361066000  | -1.897276000 | 6                          | -2.466007000 | -2.805285000 | -0.162096000 |
| 6                          | -3.647906000 | -0.937382000 | 0.533853000  | 1                          | -3.480504000 | -2.918775000 | -0.584126000 |
| 1                          | -4.530433000 | -0.277595000 | 0.514123000  | 1                          | -2.485154000 | -3.012544000 | 0.921541000  |
| 1                          | -3.419314000 | -1.212677000 | 1.573638000  | 1                          | -1.763143000 | -3.489213000 | -0.652162000 |
| 1                          | -3.865323000 | -1.860318000 | -0.023829000 | 1                          | 3.129880000  | -0.192200000 | -2.275965000 |
| 1                          | -2.068205000 | 1.050013000  | -2.365408000 | 1                          | 4.295629000  | 0.857646000  | 0.742169000  |
| 1                          | -3.761920000 | 0.872504000  | -1.826530000 | 1                          | -3.012711000 | -0.754444000 | 1.253829000  |
| 1                          | -2.908368000 | -0.534074000 | -2.526883000 |                            |              |              |              |
| 1                          | 2.633707000  | -2.956747000 | -0.292534000 |                            |              |              |              |
| 1                          | 3.775116000  | -0.852259000 | 1.494095000  |                            |              |              |              |
| 1                          | -2.210887000 | 1.338626000  | 1.740332000  |                            |              |              |              |
| SCN-R                      |              |              |              | OCN-R                      |              |              |              |
| E(RB-P86) = -1166.36120178 |              |              |              | E(RB-P86) = -843.318065652 |              |              |              |
| 16                         | -2.233831000 | 0.153086000  | -0.722941000 | 8                          | -1.212329000 | -1.897338000 | -0.521927000 |
| 8                          | -1.164807000 | -1.531640000 | 2.591116000  | 8                          | 1.191067000  | -1.798707000 | 2.513542000  |
| 6                          | -0.779473000 | -1.290402000 | 1.502381000  | 6                          | 0.984114000  | -1.337258000 | 1.445596000  |
| 44                         | -0.247545000 | -0.909220000 | -0.178610000 | 44                         | 0.639057000  | -0.680902000 | -0.198778000 |
| 7                          | 1.963245000  | -1.119444000 | 0.144436000  | 7                          | 1.781556000  | 1.169503000  | 0.042661000  |
| 1                          | -0.524470000 | -2.563164000 | -0.587962000 | 1                          | 1.851875000  | -1.746889000 | -0.892422000 |
| 6                          | 0.320530000  | 1.073130000  | 0.041237000  | 6                          | -0.856893000 | 0.633079000  | 0.161038000  |
| 6                          | -0.595365000 | 2.136601000  | 0.205882000  | 6                          | -2.181908000 | 0.177823000  | 0.269949000  |
| 6                          | 1.698443000  | 1.355701000  | -0.054753000 | 6                          | -0.584249000 | 2.006462000  | 0.042258000  |
| 6                          | -2.053295000 | 1.757432000  | 0.268487000  | 6                          | -2.327696000 | -1.322093000 | 0.273069000  |
| 6                          | 2.572647000  | 0.164254000  | -0.383894000 | 6                          | 0.844446000  | 2.310542000  | -0.357451000 |
| 6                          | -0.131946000 | 3.462912000  | 0.285265000  | 6                          | -3.238670000 | 1.101414000  | 0.336673000  |
| 6                          | 2.167356000  | 2.673830000  | 0.056081000  | 6                          | -1.629417000 | 2.939137000  | 0.138585000  |
| 1                          | -0.832796000 | 4.296422000  | 0.403224000  | 1                          | -4.280182000 | 0.770510000  | 0.416661000  |
| 1                          | 3.238146000  | 2.898487000  | -0.005130000 | 1                          | -1.440838000 | 4.016041000  | 0.063950000  |
| 6                          | 1.247116000  | 3.722849000  | 0.229559000  | 6                          | -2.949620000 | 2.478272000  | 0.304522000  |
| 1                          | 1.607162000  | 4.751970000  | 0.311966000  | 1                          | -3.766666000 | 3.200955000  | 0.377888000  |
| 1                          | 2.632052000  | 0.045883000  | -1.478975000 | 1                          | 0.900369000  | 2.375462000  | -1.457189000 |
| 1                          | 3.608681000  | 0.262016000  | -0.002506000 | 1                          | 1.239865000  | 3.259448000  | 0.053612000  |
| 1                          | -2.735549000 | 2.514690000  | -0.149655000 | 1                          | -3.273426000 | -1.674518000 | -0.176846000 |
| 8                          | 0.274861000  | -0.872867000 | -2.488401000 | 8                          | 0.515435000  | -0.239303000 | -2.520492000 |
| 1                          | -0.338175000 | -0.237623000 | -2.903586000 | 1                          | -0.362248000 | -0.589197000 | -2.761253000 |
| 1                          | -0.201552000 | -1.733279000 | -2.473982000 | 1                          | 1.110599000  | -1.032366000 | -2.432999000 |

|                            |              |              |              |                            |              |              |              |
|----------------------------|--------------|--------------|--------------|----------------------------|--------------|--------------|--------------|
| 6                          | 2.568147000  | -2.278511000 | -0.561125000 | 6                          | 2.998024000  | 1.220569000  | -0.813282000 |
| 1                          | 3.667689000  | -2.293971000 | -0.418139000 | 1                          | 3.501378000  | 2.203448000  | -0.715594000 |
| 1                          | 2.342894000  | -2.208147000 | -1.633397000 | 1                          | 2.709236000  | 1.059458000  | -1.859855000 |
| 6                          | 2.272459000  | -1.227179000 | 1.597242000  | 6                          | 2.186402000  | 1.382723000  | 1.462590000  |
| 1                          | 1.876741000  | -0.345617000 | 2.117207000  | 1                          | 1.288602000  | 1.399531000  | 2.092946000  |
| 1                          | 1.800140000  | -2.130305000 | 2.004768000  | 1                          | 2.839604000  | 0.561368000  | 1.782342000  |
| 6                          | -3.787124000 | -0.502974000 | 0.003291000  | 6                          | -1.173019000 | -3.338757000 | -0.421926000 |
| 1                          | -4.612616000 | 0.194793000  | -0.200010000 | 1                          | -2.121315000 | -3.762938000 | -0.797306000 |
| 1                          | -3.663046000 | -0.661546000 | 1.082628000  | 1                          | -1.007791000 | -3.648539000 | 0.623930000  |
| 1                          | -3.976913000 | -1.464995000 | -0.489811000 | 1                          | -0.329056000 | -3.669270000 | -1.038323000 |
| 1                          | 2.130506000  | -3.203775000 | -0.165200000 | 1                          | 3.679694000  | 0.418301000  | -0.504183000 |
| 1                          | 3.368486000  | -1.284635000 | 1.750038000  | 1                          | 2.727203000  | 2.344101000  | 1.559100000  |
| 1                          | -2.374221000 | 1.505395000  | 1.293722000  | 1                          | -2.238772000 | -1.740408000 | 1.294428000  |
| SCS-R                      |              |              |              | OCS-R                      |              |              |              |
| E(RB-P86) = -1469.93283049 |              |              |              | E(RB-P86) = -1146.89930621 |              |              |              |
| 16                         | -2.148101000 | 0.817787000  | -0.589828000 | 8                          | -1.355799000 | -1.908745000 | -0.219281000 |
| 8                          | -1.357020000 | -1.419426000 | 2.523236000  | 8                          | 1.529024000  | -1.119341000 | 2.620480000  |
| 6                          | -1.020153000 | -1.199984000 | 1.415691000  | 6                          | 1.156658000  | -0.991689000 | 1.510048000  |
| 44                         | -0.544096000 | -0.843250000 | -0.292624000 | 44                         | 0.587910000  | -0.782151000 | -0.194627000 |
| 16                         | 1.595152000  | -1.954376000 | -0.224813000 | 16                         | 1.929371000  | 0.993865000  | -0.684881000 |
| 1                          | -1.418886000 | -2.228968000 | -0.759583000 | 1                          | 1.565307000  | -2.125842000 | -0.665439000 |
| 6                          | 0.651290000  | 0.874958000  | 0.006120000  | 6                          | -0.802413000 | 0.719392000  | 0.115724000  |
| 6                          | 0.066457000  | 2.122799000  | 0.340537000  | 6                          | -2.158401000 | 0.344945000  | 0.226012000  |
| 6                          | 2.056440000  | 0.820777000  | -0.156318000 | 6                          | -0.470361000 | 2.094391000  | 0.115365000  |
| 6                          | -1.432152000 | 2.161478000  | 0.514813000  | 6                          | -2.443923000 | -1.126619000 | 0.394408000  |
| 6                          | 2.670405000  | -0.477919000 | -0.630070000 | 6                          | 0.997810000  | 2.438934000  | 0.115072000  |
| 6                          | 0.857038000  | 3.273462000  | 0.512080000  | 6                          | -3.173660000 | 1.315525000  | 0.267615000  |
| 6                          | 2.851510000  | 1.962698000  | 0.049328000  | 6                          | -1.483496000 | 3.068793000  | 0.156843000  |
| 1                          | 0.396915000  | 4.235536000  | 0.762169000  | 1                          | -4.227907000 | 1.025675000  | 0.340661000  |
| 1                          | 3.940053000  | 1.911204000  | -0.064745000 | 1                          | -1.234928000 | 4.135371000  | 0.143549000  |
| 6                          | 2.250628000  | 3.186138000  | 0.382956000  | 6                          | -2.830001000 | 2.676233000  | 0.227455000  |
| 1                          | 2.869741000  | 4.074405000  | 0.534955000  | 1                          | -3.615980000 | 3.435608000  | 0.252428000  |
| 1                          | 2.732089000  | -0.511626000 | -1.730583000 | 1                          | 1.246714000  | 3.357066000  | -0.440782000 |
| 1                          | 3.680140000  | -0.670139000 | -0.231364000 | 1                          | 1.391485000  | 2.524185000  | 1.142445000  |
| 1                          | -1.885861000 | 3.129328000  | 0.247844000  | 1                          | -3.394565000 | -1.446357000 | -0.071364000 |
| 8                          | -0.125576000 | -0.690824000 | -2.590918000 | 8                          | 0.041189000  | -0.795922000 | -2.477028000 |
| 1                          | -0.528362000 | 0.142062000  | -2.900637000 | 1                          | -0.857743000 | -1.173657000 | -2.421621000 |
| 1                          | -0.772204000 | -1.393664000 | -2.797057000 | 1                          | 0.632939000  | -1.561651000 | -2.618604000 |
| 6                          | 2.041250000  | -2.156221000 | 1.543019000  | 6                          | 3.509474000  | 1.095921000  | 0.240888000  |
| 1                          | 1.913159000  | -1.201593000 | 2.069517000  | 1                          | 3.333521000  | 0.983726000  | 1.318642000  |
| 1                          | 3.079707000  | -2.510961000 | 1.609616000  | 1                          | 3.995019000  | 2.057853000  | 0.019700000  |
| 6                          | -3.777028000 | 0.555169000  | 0.212485000  | 6                          | -1.416216000 | -3.306438000 | 0.145566000  |
| 1                          | -4.376955000 | 1.474042000  | 0.140421000  | 1                          | -2.380325000 | -3.735338000 | -0.180072000 |
| 1                          | -3.638066000 | 0.257203000  | 1.260071000  | 1                          | -1.301722000 | -3.421270000 | 1.236886000  |
| 1                          | -4.265543000 | -0.258420000 | -0.338692000 | 1                          | -0.578675000 | -3.795787000 | -0.364544000 |
| 1                          | 1.362767000  | -2.908818000 | 1.964348000  | 1                          | 4.132581000  | 0.268245000  | -0.121456000 |
| 1                          | -1.734655000 | 1.890701000  | 1.541019000  | 1                          | -2.471845000 | -1.399266000 | 1.467926000  |
| PCS-R                      |              |              |              | OCO-R                      |              |              |              |
| E(RB-P86) = -1453.03556690 |              |              |              | E(RB-P86) = -823.853777110 |              |              |              |
| 15                         | -2.142457000 | -0.288934000 | -0.342463000 | 8                          | -0.506587000 | 2.101495000  | -0.368370000 |
| 8                          | -0.731021000 | -1.559831000 | 2.856932000  | 8                          | -2.035062000 | -0.041793000 | 2.600765000  |
| 6                          | -0.432721000 | -1.317530000 | 1.746077000  | 6                          | -1.614368000 | -0.038578000 | 1.498239000  |
| 44                         | 0.018504000  | -0.961390000 | 0.027359000  | 44                         | -0.967756000 | -0.024880000 | -0.187529000 |
| 16                         | 2.383993000  | -0.867093000 | 0.522500000  | 8                          | -0.452386000 | -2.114342000 | -0.364754000 |
| 1                          | -0.101459000 | -2.634412000 | -0.352435000 | 1                          | -2.601641000 | -0.037745000 | -0.827461000 |
| 6                          | 0.260387000  | 1.146714000  | 0.133852000  | 6                          | 1.018205000  | 0.005923000  | 0.174869000  |
| 6                          | -0.844054000 | 2.026287000  | 0.292965000  | 6                          | 1.693712000  | 1.237425000  | 0.207923000  |
| 6                          | 1.550615000  | 1.720767000  | 0.005395000  | 6                          | 1.734837000  | -1.201838000 | 0.173517000  |
| 6                          | -2.216884000 | 1.398794000  | 0.459618000  | 6                          | 0.794750000  | 2.446477000  | 0.264233000  |
| 6                          | 2.729915000  | 0.808107000  | -0.236106000 | 6                          | 0.881575000  | -2.445833000 | 0.183575000  |
| 6                          | -0.662934000 | 3.419851000  | 0.311427000  | 6                          | 3.098057000  | 1.268354000  | 0.230899000  |
| 6                          | 1.732016000  | 3.115243000  | 0.056442000  | 6                          | 3.138630000  | -1.182017000 | 0.200078000  |
| 1                          | -1.522794000 | 4.088375000  | 0.428483000  | 1                          | 3.647985000  | 2.215744000  | 0.252615000  |
| 1                          | 2.735560000  | 3.546196000  | -0.028398000 | 1                          | 3.721690000  | -2.109581000 | 0.196166000  |
| 6                          | 0.625562000  | 3.962783000  | 0.201423000  | 6                          | 3.809627000  | 0.054699000  | 0.234689000  |
| 1                          | 0.767645000  | 5.046505000  | 0.233598000  | 1                          | 4.902448000  | 0.072582000  | 0.249385000  |

|   |              |              |              |   |              |              |              |
|---|--------------|--------------|--------------|---|--------------|--------------|--------------|
| 1 | 2.872916000  | 0.618201000  | -1.313391000 | 1 | 1.289278000  | -3.267333000 | -0.432569000 |
| 1 | 3.670702000  | 1.199880000  | 0.182114000  | 1 | 0.729442000  | -2.817501000 | 1.216223000  |
| 1 | -3.036283000 | 2.019550000  | 0.057325000  | 1 | 1.192888000  | 3.328565000  | -0.268935000 |
| 8 | 0.666838000  | -1.086355000 | -2.270713000 | 8 | -0.572307000 | 0.020682000  | -2.511181000 |
| 1 | -0.023786000 | -0.702746000 | -2.838633000 | 1 | -0.270166000 | 0.934408000  | -2.667892000 |
| 1 | 0.347153000  | -1.994735000 | -2.026100000 | 1 | -1.557189000 | 0.067767000  | -2.520540000 |
| 6 | 3.405847000  | -1.913499000 | -0.587612000 | 6 | -1.412707000 | -3.170735000 | -0.154526000 |
| 1 | 4.468288000  | -1.657882000 | -0.461234000 | 1 | -1.598746000 | -3.315159000 | 0.923875000  |
| 1 | 3.093315000  | -1.779076000 | -1.631944000 | 1 | -1.031807000 | -4.104576000 | -0.603765000 |
| 6 | -2.618431000 | 0.066686000  | -2.101691000 | 6 | -1.516156000 | 3.106729000  | -0.113921000 |
| 6 | -3.616340000 | -1.198480000 | 0.296134000  | 1 | -1.167154000 | 4.082411000  | -0.495220000 |
| 1 | -4.543084000 | -0.619774000 | 0.152732000  | 1 | -1.725259000 | 3.172554000  | 0.966937000  |
| 1 | -3.474540000 | -1.404159000 | 1.366994000  | 1 | -2.416288000 | 2.776663000  | -0.644674000 |
| 1 | -3.698794000 | -2.161973000 | -0.228101000 | 1 | -2.333921000 | -2.848661000 | -0.652634000 |
| 1 | -1.911898000 | 0.796773000  | -2.526490000 | 1 | 0.573471000  | 2.732606000  | 1.310662000  |
| 1 | -3.632103000 | 0.495453000  | -2.153823000 |   |              |              |              |
| 1 | -2.599581000 | -0.858561000 | -2.698073000 |   |              |              |              |
| 1 | 3.236806000  | -2.952596000 | -0.276164000 |   |              |              |              |
| 1 | -2.433686000 | 1.218805000  | 1.529363000  |   |              |              |              |

### Transition States

|                                      |              |              |              |                                      |              |              |              |
|--------------------------------------|--------------|--------------|--------------|--------------------------------------|--------------|--------------|--------------|
| PNN-TS<br>E(RB-P86) = -1165.50934134 |              |              |              | NNN-TS<br>E(RB-P86) = -878.817078597 |              |              |              |
| 15                                   | -2.247039000 | 0.071234000  | -0.176872000 | 7                                    | -2.224040000 | -0.285648000 | -0.221600000 |
| 8                                    | -0.582222000 | -1.206570000 | 2.893451000  | 8                                    | -0.413376000 | -1.242756000 | 2.911538000  |
| 6                                    | -0.396562000 | -1.039177000 | 1.747780000  | 6                                    | -0.298528000 | -1.063324000 | 1.755742000  |
| 44                                   | -0.131930000 | -0.884156000 | -0.064963000 | 44                                   | -0.108265000 | -0.890016000 | -0.055556000 |
| 7                                    | 2.138191000  | -1.088158000 | -0.001542000 | 7                                    | 2.112311000  | -0.706296000 | 0.005102000  |
| 1                                    | -0.577528000 | -2.573426000 | -0.353991000 | 1                                    | -0.286896000 | -2.648224000 | -0.334225000 |
| 7                                    | 0.441592000  | 1.100064000  | -0.037524000 | 7                                    | 0.094592000  | 1.109922000  | -0.072972000 |
| 6                                    | -0.503273000 | 2.113386000  | 0.158434000  | 6                                    | -1.066630000 | 1.857762000  | 0.132309000  |
| 6                                    | 1.756160000  | 1.368601000  | -0.253050000 | 6                                    | 1.318957000  | 1.654659000  | -0.266103000 |
| 6                                    | -1.855891000 | 1.757882000  | 0.209118000  | 6                                    | -2.244580000 | 1.140104000  | 0.187366000  |
| 6                                    | 2.557197000  | 0.168548000  | -0.706785000 | 6                                    | 2.338912000  | 0.620180000  | -0.690817000 |
| 6                                    | 0.013400000  | 3.453548000  | 0.272553000  | 6                                    | -0.876910000 | 3.285989000  | 0.258960000  |
| 6                                    | 2.271061000  | 2.654382000  | -0.170239000 | 6                                    | 1.524702000  | 3.022165000  | -0.173152000 |
| 1                                    | -0.691134000 | 4.265647000  | 0.465118000  | 1                                    | -1.743777000 | 3.920658000  | 0.456469000  |
| 1                                    | 3.331690000  | 2.842527000  | -0.341876000 | 1                                    | 2.510881000  | 3.459439000  | -0.332449000 |
| 6                                    | 1.360070000  | 3.707596000  | 0.121666000  | 6                                    | 0.380185000  | 3.831684000  | 0.116945000  |
| 1                                    | 1.730453000  | 4.733058000  | 0.210055000  | 1                                    | 0.505633000  | 4.914235000  | 0.211952000  |
| 1                                    | 2.341727000  | -0.000558000 | -1.774972000 | 1                                    | 2.202481000  | 0.420115000  | -1.766194000 |
| 1                                    | 3.644210000  | 0.337727000  | -0.582749000 | 1                                    | 3.376394000  | 0.961591000  | -0.518338000 |
| 1                                    | -2.626995000 | 2.517759000  | 0.351857000  | 1                                    | -3.231158000 | 1.592273000  | 0.307261000  |
| 8                                    | 0.192469000  | -1.328526000 | -2.214673000 | 8                                    | 0.297682000  | -1.358688000 | -2.212907000 |
| 1                                    | -0.548932000 | -1.008036000 | -2.756046000 | 1                                    | -0.464827000 | -1.199045000 | -2.794015000 |
| 1                                    | -0.347069000 | -2.238173000 | -1.234150000 | 1                                    | -0.085400000 | -2.296851000 | -1.219516000 |
| 6                                    | 2.665664000  | -2.267485000 | -0.732743000 | 6                                    | 2.846541000  | -1.773426000 | -0.727370000 |
| 1                                    | 3.770956000  | -2.224737000 | -0.801913000 | 1                                    | 3.925477000  | -1.530095000 | -0.784609000 |
| 1                                    | 2.224417000  | -2.287024000 | -1.738220000 | 1                                    | 2.419930000  | -1.867644000 | -1.734337000 |
| 6                                    | 2.668802000  | -1.080833000 | 1.385599000  | 6                                    | 2.641085000  | -0.614083000 | 1.393770000  |
| 1                                    | 2.317420000  | -0.182135000 | 1.909638000  | 1                                    | 2.151725000  | 0.216580000  | 1.918939000  |
| 1                                    | 2.309338000  | -1.970423000 | 1.920141000  | 1                                    | 2.434779000  | -1.551193000 | 1.926846000  |
| 6                                    | -3.104648000 | -0.002357000 | -1.828162000 | 6                                    | -2.688883000 | -0.394040000 | -1.642190000 |
| 6                                    | -3.600273000 | -0.506485000 | 0.942081000  | 6                                    | -3.164074000 | -1.075517000 | 0.625671000  |
| 1                                    | -4.462524000 | 0.175993000  | 0.870487000  | 1                                    | -4.193890000 | -0.689313000 | 0.502234000  |
| 1                                    | -3.237587000 | -0.518184000 | 1.978690000  | 1                                    | -2.871272000 | -0.980027000 | 1.677291000  |
| 1                                    | -3.919868000 | -1.521390000 | 0.659770000  | 1                                    | -3.134090000 | -2.133017000 | 0.325509000  |
| 1                                    | -2.443236000 | 0.420801000  | -2.598358000 | 1                                    | -2.029574000 | 0.212121000  | -2.277398000 |
| 1                                    | -4.026050000 | 0.601559000  | -1.797886000 | 1                                    | -3.718223000 | -0.000857000 | -1.727932000 |
| 1                                    | -3.363292000 | -1.040167000 | -2.092021000 | 1                                    | -2.677683000 | -1.446998000 | -1.967455000 |
| 1                                    | 2.377064000  | -3.179364000 | -0.190971000 | 1                                    | 2.719985000  | -2.721783000 | -0.186844000 |
| 1                                    | 3.776749000  | -1.085298000 | 1.374555000  | 1                                    | 3.733990000  | -0.438498000 | 1.371745000  |
| PNP-TS<br>E(RB-P86) = -1452.17423911 |              |              |              | SNS-TS<br>E(RB-P86) = -1485.96472472 |              |              |              |
| 15                                   | -2.382006000 | -0.424397000 | -0.162299000 | 16                                   | -1.656178000 | -1.888974000 | -0.031656000 |

|                            |              |              |              |                            |              |              |              |
|----------------------------|--------------|--------------|--------------|----------------------------|--------------|--------------|--------------|
| 8                          | -0.295379000 | -1.045619000 | 2.978165000  | 8                          | 0.156064000  | -0.980399000 | 3.171730000  |
| 6                          | -0.209172000 | -0.944897000 | 1.815430000  | 6                          | 0.255137000  | -0.885893000 | 2.013133000  |
| 44                         | -0.054044000 | -0.882383000 | -0.025220000 | 44                         | 0.490543000  | -0.810625000 | 0.179258000  |
| 15                         | 2.293993000  | -0.689232000 | -0.004157000 | 16                         | 2.288797000  | 0.755479000  | 0.413680000  |
| 1                          | -0.160522000 | -2.633713000 | -0.175687000 | 1                          | 1.450443000  | -2.293847000 | 0.152910000  |
| 7                          | 0.050345000  | 1.236758000  | -0.113510000 | 7                          | -0.642680000 | 0.914255000  | -0.081933000 |
| 6                          | -1.132400000 | 1.974131000  | 0.071950000  | 6                          | -2.033186000 | 0.823274000  | 0.043256000  |
| 6                          | 1.243958000  | 1.878827000  | -0.309121000 | 6                          | -0.031474000 | 2.117341000  | -0.289546000 |
| 6                          | -2.365949000 | 1.314996000  | 0.131078000  | 6                          | -2.627582000 | -0.431661000 | 0.140693000  |
| 6                          | 2.416938000  | 1.019917000  | -0.729411000 | 6                          | 1.435370000  | 2.054347000  | -0.621888000 |
| 6                          | -1.009355000 | 3.405001000  | 0.189136000  | 6                          | -2.774914000 | 2.059239000  | 0.077155000  |
| 6                          | 1.372990000  | 3.258922000  | -0.214498000 | 6                          | -0.728186000 | 3.316797000  | -0.280782000 |
| 1                          | -1.917449000 | 3.982229000  | 0.376037000  | 1                          | -3.857185000 | 2.008967000  | 0.214371000  |
| 1                          | 2.342197000  | 3.730650000  | -0.381527000 | 1                          | -0.207834000 | 4.260610000  | -0.447050000 |
| 6                          | 0.211211000  | 4.025844000  | 0.062112000  | 6                          | -2.135135000 | 3.267549000  | -0.073071000 |
| 1                          | 0.285305000  | 5.113212000  | 0.155906000  | 1                          | -2.711654000 | 4.196427000  | -0.047455000 |
| 1                          | 2.359096000  | 0.857095000  | -1.821152000 | 1                          | 1.568525000  | 1.712461000  | -1.661171000 |
| 1                          | 3.378847000  | 1.508673000  | -0.506882000 | 1                          | 1.933996000  | 3.022880000  | -0.474385000 |
| 1                          | -3.284227000 | 1.895185000  | 0.247363000  | 1                          | -3.694827000 | -0.565409000 | 0.310802000  |
| 8                          | 0.277887000  | -1.359611000 | -2.166396000 | 8                          | 1.253821000  | -1.091274000 | -1.884780000 |
| 1                          | -0.543322000 | -1.167570000 | -2.651450000 | 1                          | 0.580137000  | -1.477461000 | -2.469852000 |
| 1                          | -0.038667000 | -2.327447000 | -1.070603000 | 1                          | 1.462423000  | -1.993280000 | -0.766086000 |
| 6                          | 3.331280000  | -1.730469000 | -1.113492000 | 6                          | 3.659021000  | 0.324760000  | -0.729103000 |
| 1                          | 4.327367000  | -1.288690000 | -1.276204000 | 1                          | 4.254996000  | 1.227568000  | -0.925257000 |
| 1                          | 2.793443000  | -1.825603000 | -2.068659000 | 1                          | 4.277945000  | -0.416041000 | -0.205208000 |
| 6                          | 3.232452000  | -0.607228000 | 1.582402000  | 6                          | -1.859620000 | -2.353701000 | -1.826525000 |
| 1                          | 2.757384000  | 0.134571000  | 2.241023000  | 1                          | -1.640677000 | -1.486908000 | -2.464349000 |
| 1                          | 3.199798000  | -1.585566000 | 2.084409000  | 1                          | -2.903877000 | -2.665883000 | -1.966173000 |
| 6                          | -3.247474000 | -0.780520000 | -1.773736000 | 1                          | -1.191018000 | -3.200224000 | -2.045067000 |
| 6                          | -3.537657000 | -1.233533000 | 1.035497000  | 1                          | 3.235883000  | -0.105163000 | -1.647762000 |
| 1                          | -4.538026000 | -0.776694000 | 0.963748000  |                            |              |              |              |
| 1                          | -3.156028000 | -1.098517000 | 2.056723000  |                            |              |              |              |
| 1                          | -3.618038000 | -2.310396000 | 0.820634000  |                            |              |              |              |
| 1                          | -2.717435000 | -0.266854000 | -2.589570000 |                            |              |              |              |
| 1                          | -4.279675000 | -0.395567000 | -1.740467000 |                            |              |              |              |
| 1                          | -3.273771000 | -1.862987000 | -1.977548000 |                            |              |              |              |
| 1                          | 3.446177000  | -2.731461000 | -0.671246000 |                            |              |              |              |
| 1                          | 4.282272000  | -0.322674000 | 1.408002000  |                            |              |              |              |
| SNN-TS                     |              |              |              | ONP-TS                     |              |              |              |
| E(RB-P86) = -1182.39770344 |              |              |              | E(RB-P86) = -1146.03243430 |              |              |              |
| 16                         | -2.148755000 | -1.282979000 | 0.206823000  | 8                          | -1.887342000 | -1.577175000 | -0.465000000 |
| 8                          | 0.276498000  | -1.173712000 | 3.050445000  | 8                          | 0.534824000  | -1.620678000 | 2.764965000  |
| 6                          | 0.243115000  | -1.032358000 | 1.888589000  | 6                          | 0.401932000  | -1.326530000 | 1.638712000  |
| 44                         | 0.220801000  | -0.926973000 | 0.051068000  | 44                         | 0.226242000  | -0.924974000 | -0.160169000 |
| 7                          | 2.210769000  | 0.043429000  | -0.139850000 | 15                         | 2.048552000  | 0.419649000  | -0.132281000 |
| 1                          | 0.707240000  | -2.624930000 | -0.120595000 | 1                          | 0.997751000  | -2.443613000 | -0.696836000 |
| 7                          | -0.345972000 | 1.034682000  | -0.072600000 | 7                          | -0.760782000 | 0.860878000  | 0.117060000  |
| 6                          | -1.655686000 | 1.412127000  | 0.225581000  | 6                          | -2.156316000 | 0.785296000  | -0.053583000 |
| 6                          | 0.605931000  | 1.932925000  | -0.439652000 | 6                          | -0.139433000 | 2.049091000  | 0.384800000  |
| 6                          | -2.594239000 | 0.410190000  | 0.455538000  | 6                          | -2.739257000 | -0.439039000 | -0.271719000 |
| 6                          | 1.873036000  | 1.277271000  | -0.939724000 | 6                          | 1.343629000  | 1.948662000  | 0.677215000  |
| 6                          | -1.917166000 | 2.829648000  | 0.274366000  | 6                          | -2.896428000 | 2.030909000  | 0.001595000  |
| 6                          | 0.370526000  | 3.298614000  | -0.432974000 | 6                          | -0.829613000 | 3.248142000  | 0.433042000  |
| 1                          | -2.919324000 | 3.166160000  | 0.548646000  | 1                          | -3.978089000 | 1.999028000  | -0.147383000 |
| 1                          | 1.148933000  | 4.003397000  | -0.727966000 | 1                          | -0.304577000 | 4.181524000  | 0.637828000  |
| 6                          | -0.928394000 | 3.736336000  | -0.040944000 | 6                          | -2.246694000 | 3.215196000  | 0.231406000  |
| 1                          | -1.147411000 | 4.807317000  | -0.005588000 | 1                          | -2.816833000 | 4.147890000  | 0.265325000  |
| 1                          | 1.699630000  | 0.926874000  | -1.970427000 | 1                          | 1.885148000  | 2.862055000  | 0.384088000  |
| 1                          | 2.728885000  | 1.977635000  | -0.935373000 | 1                          | 1.492849000  | 1.806571000  | 1.763802000  |
| 1                          | -3.614506000 | 0.610405000  | 0.778840000  | 1                          | -3.791057000 | -0.616630000 | -0.488204000 |
| 8                          | 0.558451000  | -1.359318000 | -2.105674000 | 8                          | 0.264695000  | -0.853731000 | -2.347560000 |
| 1                          | -0.275046000 | -1.533073000 | -2.575066000 | 1                          | -0.663230000 | -1.015481000 | -2.602343000 |
| 1                          | 0.660287000  | -2.304943000 | -1.037000000 | 1                          | 0.749308000  | -2.009539000 | -1.491831000 |
| 6                          | 3.219527000  | -0.760709000 | -0.881471000 | 6                          | 2.653319000  | 0.933826000  | -1.789109000 |
| 1                          | 4.129058000  | -0.158150000 | -1.070764000 | 1                          | 3.161339000  | 0.084232000  | -2.267895000 |

|                                      |              |              |              |                                      |              |              |              |
|--------------------------------------|--------------|--------------|--------------|--------------------------------------|--------------|--------------|--------------|
| 1                                    | 2.778702000  | -1.092648000 | -1.830246000 | 1                                    | 3.346617000  | 1.785729000  | -1.706479000 |
| 6                                    | 2.777286000  | 0.452582000  | 1.173975000  | 6                                    | 3.576677000  | 0.035065000  | 0.820620000  |
| 1                                    | 2.059729000  | 1.096263000  | 1.699037000  | 1                                    | 3.311636000  | -0.232203000 | 1.853584000  |
| 1                                    | 2.973146000  | -0.440993000 | 1.780639000  | 1                                    | 4.083054000  | -0.824531000 | 0.357096000  |
| 6                                    | -2.754299000 | -1.653602000 | -1.517335000 | 6                                    | -2.400653000 | -2.778289000 | 0.160764000  |
| 1                                    | -2.383455000 | -0.894899000 | -2.219863000 | 1                                    | -3.408237000 | -2.984812000 | -0.237304000 |
| 1                                    | -3.852680000 | -1.632913000 | -1.491724000 | 1                                    | -2.448503000 | -2.650920000 | 1.254406000  |
| 1                                    | -2.410943000 | -2.662548000 | -1.791917000 | 1                                    | -1.719378000 | -3.596033000 | -0.107638000 |
| 1                                    | 3.488653000  | -1.636996000 | -0.275660000 | 1                                    | 1.781425000  | 1.186454000  | -2.407614000 |
| 1                                    | 3.722925000  | 1.007823000  | 1.022161000  | 1                                    | 4.262912000  | 0.896958000  | 0.827913000  |
| ONS-TS<br>E(RB-P86) = -1162.91836650 |              |              |              | ONN-TS<br>E(RB-P86) = -859.349767636 |              |              |              |
| 8                                    | -0.970703000 | -2.121186000 | -0.201996000 | 8                                    | -1.195032000 | -1.916419000 | -0.586377000 |
| 8                                    | 0.390256000  | -1.110470000 | 3.085818000  | 8                                    | 0.628447000  | -1.554726000 | 2.729486000  |
| 6                                    | 0.474419000  | -0.915866000 | 1.937458000  | 6                                    | 0.598440000  | -1.191640000 | 1.613160000  |
| 44                                   | 0.670504000  | -0.678921000 | 0.117570000  | 44                                   | 0.590107000  | -0.712466000 | -0.161544000 |
| 16                                   | 1.870720000  | 1.286722000  | 0.457570000  | 7                                    | 1.807654000  | 1.070891000  | 0.088603000  |
| 1                                    | 2.037921000  | -1.821901000 | -0.003774000 | 1                                    | 1.871080000  | -1.889288000 | -0.601957000 |
| 7                                    | -0.914126000 | 0.580452000  | -0.132224000 | 7                                    | -0.864366000 | 0.660478000  | -0.053299000 |
| 6                                    | -2.175981000 | -0.037720000 | -0.126623000 | 6                                    | -2.182968000 | 0.196491000  | -0.015224000 |
| 6                                    | -0.777630000 | 1.936744000  | -0.169973000 | 6                                    | -0.533086000 | 1.973885000  | -0.090011000 |
| 6                                    | -2.219208000 | -1.408237000 | -0.194327000 | 6                                    | -2.359582000 | -1.157509000 | -0.173703000 |
| 6                                    | 0.630712000  | 2.420344000  | -0.393365000 | 6                                    | 0.917852000  | 2.172655000  | -0.467643000 |
| 6                                    | -3.331095000 | 0.833275000  | -0.034508000 | 6                                    | -3.200598000 | 1.210472000  | 0.172952000  |
| 6                                    | -1.867407000 | 2.787969000  | -0.113325000 | 6                                    | -1.486509000 | 2.966003000  | 0.058273000  |
| 1                                    | -4.323719000 | 0.382229000  | 0.031246000  | 1                                    | -4.245056000 | 0.904144000  | 0.263881000  |
| 1                                    | -1.736465000 | 3.868987000  | -0.167885000 | 1                                    | -1.218759000 | 4.022220000  | 0.018519000  |
| 6                                    | -3.169632000 | 2.195202000  | -0.025477000 | 6                                    | -2.847522000 | 2.539068000  | 0.218877000  |
| 1                                    | -4.048322000 | 2.842332000  | 0.044865000  | 1                                    | -3.627663000 | 3.292845000  | 0.357951000  |
| 1                                    | 0.883211000  | 2.355045000  | -1.464175000 | 1                                    | 0.994671000  | 2.088371000  | -1.563968000 |
| 1                                    | 0.788250000  | 3.446686000  | -0.032351000 | 1                                    | 1.309252000  | 3.156867000  | -0.153148000 |
| 1                                    | -3.100292000 | -2.039749000 | -0.099972000 | 1                                    | -3.301039000 | -1.693901000 | -0.262447000 |
| 8                                    | 1.414677000  | -0.687563000 | -1.977297000 | 8                                    | 1.044408000  | -0.492482000 | -2.320054000 |
| 1                                    | 0.792662000  | -1.166578000 | -2.552305000 | 1                                    | 0.307665000  | -0.895025000 | -2.814655000 |
| 1                                    | 1.909797000  | -1.522022000 | -0.915333000 | 1                                    | 1.628321000  | -1.477467000 | -1.443240000 |
| 6                                    | 3.241454000  | 1.404542000  | -0.758466000 | 6                                    | 3.077365000  | 1.036961000  | -0.691069000 |
| 1                                    | 3.537969000  | 2.459425000  | -0.849431000 | 1                                    | 3.575670000  | 2.024431000  | -0.653221000 |
| 1                                    | 4.074931000  | 0.821831000  | -0.343898000 | 1                                    | 2.844907000  | 0.763975000  | -1.728631000 |
| 6                                    | -0.922294000 | -3.169058000 | -1.197402000 | 6                                    | 2.113404000  | 1.377901000  | 1.514711000  |
| 1                                    | -1.746384000 | -3.876129000 | -1.006773000 | 1                                    | 1.175034000  | 1.478327000  | 2.075304000  |
| 1                                    | 0.041018000  | -3.681891000 | -1.078544000 | 1                                    | 2.709371000  | 0.562540000  | 1.943944000  |
| 1                                    | -1.028693000 | -2.750851000 | -2.212975000 | 6                                    | -1.264001000 | -3.303042000 | -0.177383000 |
| 1                                    | 2.909465000  | 0.974992000  | -1.713467000 | 1                                    | -2.172973000 | -3.755395000 | -0.608481000 |
| ONO-TS<br>E(RB-P86) = -839.879567057 |              |              |              | PNS-TS<br>E(RB-P86) = -1469.07496482 |              |              |              |
| 8                                    | 0.600580000  | -1.998402000 | -0.699627000 | 15                                   | -2.224571000 | -0.120215000 | -0.323879000 |
| 8                                    | 1.387055000  | -0.671312000 | 2.829433000  | 8                                    | -0.718795000 | -0.904233000 | 3.026052000  |
| 6                                    | 1.195869000  | -0.414747000 | 1.703036000  | 6                                    | -0.463170000 | -0.862006000 | 1.886280000  |
| 44                                   | 0.958601000  | 0.019494000  | -0.073260000 | 44                                   | -0.061618000 | -0.891946000 | 0.083282000  |
| 8                                    | 0.493595000  | 2.099582000  | 0.387068000  | 16                                   | 2.354630000  | -1.043026000 | 0.537952000  |
| 1                                    | 2.718759000  | 0.116708000  | -0.433365000 | 1                                    | -0.402548000 | -2.615792000 | -0.067425000 |
| 7                                    | -1.038041000 | -0.026844000 | -0.033356000 | 7                                    | 0.371695000  | 1.158524000  | -0.040237000 |
| 6                                    | -1.631093000 | -1.286534000 | -0.153732000 | 6                                    | -0.683947000 | 2.081482000  | -0.012388000 |
| 6                                    | -1.738659000 | 1.123072000  | 0.091538000  | 6                                    | 1.666881000  | 1.577960000  | -0.130487000 |
| 6                                    | -0.776973000 | -2.340727000 | -0.381082000 | 6                                    | -2.001479000 | 1.612606000  | -0.066756000 |
| 6                                    | -0.888080000 | 2.362700000  | -0.057189000 | 6                                    | 2.693841000  | 0.515881000  | -0.422899000 |
| 6                                    | -3.072605000 | -1.321227000 | -0.028360000 | 6                                    | -0.333622000 | 3.476809000  | 0.062399000  |
| 6                                    | -3.118168000 | 1.121601000  | 0.214521000  | 6                                    | 2.022789000  | 2.919003000  | -0.069852000 |
| 1                                    | -3.588938000 | -2.281343000 | -0.091317000 | 1                                    | -1.143141000 | 4.207334000  | 0.123663000  |
| 1                                    | -3.680185000 | 2.049861000  | 0.319833000  | 1                                    | 3.070172000  | 3.215776000  | -0.135851000 |
| 6                                    | -3.772826000 | -0.152236000 | 0.161652000  | 6                                    | 0.982634000  | 3.878883000  | 0.047175000  |
| 1                                    | -4.861246000 | -0.193158000 | 0.259198000  | 1                                    | 1.229804000  | 4.942532000  | 0.108588000  |



|                                      |              |               |              |                                      |              |              |              |
|--------------------------------------|--------------|---------------|--------------|--------------------------------------|--------------|--------------|--------------|
| 1                                    | -0.839450000 | 2.641276000   | -1.125905000 | 1                                    | 2.610467000  | 0.211545000  | -1.479121000 |
| 1                                    | -1.274631000 | 3.209966000   | 0.533487000  | 1                                    | 3.713467000  | 0.866327000  | -0.209134000 |
| 1                                    | -1.034394000 | -3.377315000  | -0.580079000 | 1                                    | -2.837183000 | 2.315362000  | -0.064047000 |
| 8                                    | 1.200897000  | 0.762049000   | -2.134180000 | 8                                    | 0.482459000  | -1.494814000 | -1.974762000 |
| 1                                    | 0.989074000  | 0.045403000   | -2.758881000 | 1                                    | -0.222756000 | -1.256484000 | -2.600520000 |
| 1                                    | 2.292152000  | 0.351753000   | -1.262315000 | 1                                    | -0.105560000 | -2.355358000 | -0.950879000 |
| 6                                    | 1.401371000  | 3.131410000   | -0.077398000 | 6                                    | 3.122467000  | -2.258831000 | -0.601067000 |
| 1                                    | 1.493701000  | 3.081579000   | -1.173847000 | 1                                    | 4.193280000  | -2.033640000 | -0.706922000 |
| 1                                    | 1.022406000  | 4.114649000   | 0.248377000  | 1                                    | 2.595348000  | -2.226771000 | -1.564763000 |
| 6                                    | 1.528167000  | -3.052443000  | -0.333926000 | 6                                    | -2.916545000 | -0.425209000 | -2.025320000 |
| 1                                    | 1.236357000  | -3.971818000  | -0.867686000 | 6                                    | -3.614859000 | -0.724761000 | 0.733195000  |
| 1                                    | 1.506310000  | -3.218753000  | 0.754416000  | 1                                    | -4.526949000 | -0.144144000 | 0.520213000  |
| 1                                    | 2.522146000  | -2.724589000  | -0.661205000 | 1                                    | -3.349650000 | -0.598679000 | 1.791557000  |
| 1                                    | 2.366771000  | 2.925376000   | 0.400322000  | 1                                    | -3.810874000 | -1.789539000 | 0.534240000  |
|                                      |              |               |              | 1                                    | -2.221539000 | -0.020628000 | -2.775887000 |
|                                      |              |               |              | 1                                    | -3.881092000 | 0.096797000  | -2.133314000 |
|                                      |              |               |              | 1                                    | -3.068349000 | -1.501635000 | -2.203770000 |
|                                      |              |               |              | 1                                    | 3.001664000  | -3.243943000 | -0.130422000 |
| PCP-TS<br>E(RB-P86) = -1436.12624140 |              |               |              | NCN-TS<br>E(RB-P86) = -862.773609706 |              |              |              |
| 15                                   | -2.282960000 | -0.617713000  | -0.211860000 | 7                                    | -2.133244000 | -0.631347000 | -0.271931000 |
| 8                                    | -0.199217000 | -1.318068000  | 2.909361000  | 8                                    | -0.238176000 | -1.614681000 | 2.790392000  |
| 6                                    | -0.111737000 | -1.151977000  | 1.749940000  | 6                                    | -0.108233000 | -1.314393000 | 1.656681000  |
| 44                                   | 0.038681000  | -0.930255000  | -0.064860000 | 44                                   | 0.078390000  | -0.908110000 | -0.103646000 |
| 15                                   | 2.347379000  | -0.474771000  | -0.000748000 | 7                                    | 2.228890000  | -0.330548000 | 0.023728000  |
| 1                                    | 0.128167000  | -2.689742000  | -0.598467000 | 1                                    | 0.238756000  | -2.631559000 | -0.824320000 |
| 6                                    | -0.051840000 | 1.164708000   | 0.060051000  | 6                                    | -0.083085000 | 1.064370000  | 0.142632000  |
| 6                                    | -1.265299000 | 1.838284000   | 0.370825000  | 6                                    | -1.345782000 | 1.638145000  | 0.364843000  |
| 6                                    | 1.084972000  | 1.955722000   | -0.257348000 | 6                                    | 1.043092000  | 1.861164000  | -0.120319000 |
| 6                                    | -2.489565000 | 1.000234000   | 0.691333000  | 6                                    | -2.436441000 | 0.611130000  | 0.562685000  |
| 6                                    | 2.364554000  | 1.258711000   | -0.681364000 | 6                                    | 2.264812000  | 1.077969000  | -0.551990000 |
| 6                                    | -1.332290000 | 3.241934000   | 0.370308000  | 6                                    | -1.481188000 | 3.035149000  | 0.371079000  |
| 6                                    | 1.010542000  | 3.360425000   | -0.232457000 | 6                                    | 0.916545000  | 3.259544000  | -0.089497000 |
| 1                                    | -2.276970000 | 3.744546000   | 0.603937000  | 1                                    | -2.454757000 | 3.509811000  | 0.535471000  |
| 1                                    | 1.897376000  | 3.956413000   | -0.473538000 | 1                                    | 1.778770000  | 3.908103000  | -0.280190000 |
| 6                                    | -0.192482000 | 4.004128000   | 0.081944000  | 6                                    | -0.341677000 | 3.836799000  | 0.167135000  |
| 1                                    | -0.244192000 | 5.096272000   | 0.095551000  | 1                                    | -0.439152000 | 4.925480000  | 0.188653000  |
| 1                                    | 2.382506000  | 1.135997000   | -1.779136000 | 1                                    | 2.239567000  | 0.950370000  | -1.646583000 |
| 1                                    | 3.274138000  | 1.811256000   | -0.388942000 | 1                                    | 3.224462000  | 1.559165000  | -0.279919000 |
| 1                                    | -3.436274000 | 1.505591000   | 0.435158000  | 1                                    | -3.448563000 | 0.982777000  | 0.309891000  |
| 8                                    | 0.479086000  | -1.146434000  | -2.281968000 | 8                                    | 0.575346000  | -0.966993000 | -2.341772000 |
| 1                                    | -0.327546000 | -0.950283000  | -2.788786000 | 1                                    | -0.189301000 | -0.834769000 | -2.927076000 |
| 1                                    | 0.253174000  | -2.198281000  | -1.453901000 | 1                                    | 0.392100000  | -2.030162000 | -1.667894000 |
| 6                                    | 3.521525000  | -1.413259000  | -1.067397000 | 6                                    | 3.148643000  | -1.199214000 | -0.759531000 |
| 1                                    | 4.494387000  | -0.902199000  | -1.150090000 | 1                                    | 4.178194000  | -0.789821000 | -0.738745000 |
| 1                                    | 3.059058000  | -1.510919000  | -2.060642000 | 1                                    | 2.786220000  | -1.258556000 | -1.793489000 |
| 6                                    | 3.207407000  | -0.345953000  | 1.627243000  | 6                                    | 2.703827000  | -0.275191000 | 1.434497000  |
| 1                                    | 2.646770000  | 0.348398000   | 2.269856000  | 1                                    | 2.070087000  | 0.415822000  | 2.004845000  |
| 1                                    | 3.230272000  | -1.330390000  | 2.117281000  | 1                                    | 2.642112000  | -1.275867000 | 1.881542000  |
| 6                                    | -2.996344000 | -0.271209000  | -1.885341000 | 6                                    | -2.505373000 | -0.352905000 | -1.684233000 |
| 6                                    | -3.526079000 | -1.762650000  | 0.536289000  | 6                                    | -2.948403000 | -1.773409000 | 0.217868000  |
| 1                                    | -4.540317000 | -1.332328000  | 0.512316000  | 1                                    | -4.030415000 | -1.546986000 | 0.137708000  |
| 1                                    | -3.242473000 | -1.972990000  | 1.577824000  | 1                                    | -2.695929000 | -1.981443000 | 1.265477000  |
| 1                                    | -3.521532000 | -2.712849000  | -0.018461000 | 1                                    | -2.713202000 | -2.661982000 | -0.383200000 |
| 1                                    | -2.433098000 | 0.552680000   | -2.348798000 | 1                                    | -1.929775000 | 0.508912000  | -2.048886000 |
| 1                                    | -4.056570000 | 0.018874000   | -1.808978000 | 1                                    | -3.586367000 | -0.124890000 | -1.760666000 |
| 1                                    | -2.917294000 | -1.164117000  | -2.524147000 | 1                                    | -2.288438000 | -1.238931000 | -2.297585000 |
| 1                                    | 3.672105000  | -2.419065000  | -0.647690000 | 1                                    | 3.148035000  | -2.204522000 | -0.316599000 |
| 1                                    | 4.237568000  | 0.023383000   | 1.501134000  | 1                                    | 3.753759000  | 0.075793000  | 1.466933000  |
| 1                                    | -2.526660000 | 0.749669000   | 1.768175000  | 1                                    | -2.452646000 | 0.271804000  | 1.612416000  |
| PCN-TS<br>E(RB-P86) = -1149.45773569 |              |               |              | OCP-TS<br>E(RB-P86) = -1129.99741683 |              |              |              |
| 15                                   | -2.179648000 | -0.2110774000 | -0.227863000 | 8                                    | -2.001963000 | -1.427302000 | -0.433278000 |
| 8                                    | -0.498210000 | -1.369117000  | 2.856255000  | 8                                    | 0.379843000  | -1.395504000 | 2.865663000  |
| 6                                    | -0.295392000 | -1.179579000  | 1.713136000  | 6                                    | 0.300183000  | -1.203005000 | 1.709625000  |

|                            |              |              |              |                            |              |              |              |
|----------------------------|--------------|--------------|--------------|----------------------------|--------------|--------------|--------------|
| 44                         | -0.011393000 | -0.933147000 | -0.074888000 | 44                         | 0.187225000  | -0.926616000 | -0.103778000 |
| 7                          | 2.264564000  | -0.837758000 | 0.012879000  | 15                         | 2.089339000  | 0.292160000  | -0.102324000 |
| 1                          | -0.139101000 | -2.691972000 | -0.645242000 | 1                          | 0.829387000  | -2.552542000 | -0.778485000 |
| 6                          | 0.282036000  | 1.087705000  | 0.090396000  | 6                          | -0.689628000 | 0.901463000  | 0.123680000  |
| 6                          | -0.739436000 | 2.025109000  | 0.369356000  | 6                          | -2.099948000 | 0.945253000  | 0.049698000  |
| 6                          | 1.583917000  | 1.543691000  | -0.208414000 | 6                          | 0.033166000  | 2.115264000  | 0.198036000  |
| 6                          | -2.123907000 | 1.459494000  | 0.628105000  | 6                          | -2.848539000 | -0.361797000 | 0.105326000  |
| 6                          | 2.567916000  | 0.482936000  | -0.649528000 | 6                          | 1.540180000  | 2.028507000  | 0.360033000  |
| 6                          | -0.446447000 | 3.400266000  | 0.369024000  | 6                          | -2.775881000 | 2.174883000  | -0.005499000 |
| 6                          | 1.875907000  | 2.916469000  | -0.187685000 | 6                          | -0.650180000 | 3.343163000  | 0.155489000  |
| 1                          | -1.232770000 | 4.133427000  | 0.578387000  | 1                          | -3.868230000 | 2.205139000  | -0.082932000 |
| 1                          | 2.886988000  | 3.273047000  | -0.413023000 | 1                          | -0.092714000 | 4.284604000  | 0.204714000  |
| 6                          | 0.860253000  | 3.841036000  | 0.105913000  | 6                          | -2.048413000 | 3.372839000  | 0.047818000  |
| 1                          | 1.086093000  | 4.910717000  | 0.121465000  | 1                          | -2.572113000 | 4.331286000  | 0.002716000  |
| 1                          | 2.449641000  | 0.308091000  | -1.731589000 | 1                          | 2.083520000  | 2.777141000  | -0.241399000 |
| 1                          | 3.622418000  | 0.764913000  | -0.456125000 | 1                          | 1.825271000  | 2.193987000  | 1.415700000  |
| 1                          | -2.939930000 | 2.122943000  | 0.294337000  | 1                          | -3.788032000 | -0.341146000 | -0.477302000 |
| 8                          | 0.423679000  | -1.199252000 | -2.286776000 | 8                          | 0.256003000  | -0.960548000 | -2.338759000 |
| 1                          | -0.336368000 | -0.953052000 | -2.840462000 | 1                          | -0.683458000 | -1.022021000 | -2.592650000 |
| 1                          | 0.064869000  | -2.195501000 | -1.513995000 | 1                          | 0.596779000  | -2.044365000 | -1.593133000 |
| 6                          | 2.952883000  | -1.929213000 | -0.722304000 | 6                          | 2.888773000  | 0.455809000  | -1.752103000 |
| 1                          | 4.047620000  | -1.756179000 | -0.741280000 | 1                          | 3.657208000  | 1.245111000  | -1.738918000 |
| 1                          | 2.562828000  | -1.969116000 | -1.747686000 | 1                          | 2.106668000  | 0.673386000  | -2.492589000 |
| 6                          | 2.755258000  | -0.805959000 | 1.415626000  | 6                          | 3.494659000  | -0.076976000 | 1.032893000  |
| 1                          | 2.291267000  | 0.036012000  | 1.945493000  | 1                          | 3.128002000  | -0.134305000 | 2.067840000  |
| 1                          | 2.484707000  | -1.743352000 | 1.920096000  | 1                          | 3.929289000  | -1.050851000 | 0.763369000  |
| 6                          | -2.790503000 | 0.197340000  | -1.927351000 | 6                          | -2.535449000 | -2.739146000 | -0.168755000 |
| 6                          | -3.617103000 | -1.089876000 | 0.527907000  | 1                          | -3.545338000 | -2.828066000 | -0.606502000 |
| 1                          | -4.533325000 | -0.479603000 | 0.477884000  | 1                          | -2.579852000 | -2.928322000 | 0.918297000  |
| 1                          | -3.388065000 | -1.320761000 | 1.578357000  | 1                          | -1.855560000 | -3.457541000 | -0.642378000 |
| 1                          | -3.780840000 | -2.038533000 | -0.004676000 | 1                          | 3.348327000  | -0.505110000 | -2.026285000 |
| 1                          | -2.071575000 | 0.874913000  | -2.411732000 | 1                          | 4.272027000  | 0.700713000  | 0.961214000  |
| 1                          | -3.774717000 | 0.690548000  | -1.882969000 | 1                          | -3.093736000 | -0.629122000 | 1.153384000  |
| 1                          | -2.880193000 | -0.721577000 | -2.526425000 |                            |              |              |              |
| 1                          | 2.748316000  | -2.884376000 | -0.219002000 |                            |              |              |              |
| 1                          | 3.856981000  | -0.687874000 | 1.434415000  |                            |              |              |              |
| 1                          | -2.276823000 | 1.262091000  | 1.705728000  |                            |              |              |              |
| SCN-TS                     |              |              |              | OCN-TS                     |              |              |              |
| E(RB-P86) = -1166.35161764 |              |              |              | E(RB-P86) = -843.311183881 |              |              |              |
| 16                         | -2.264119000 | -0.103379000 | -0.772592000 | 8                          | -1.658113000 | -1.523659000 | -0.574338000 |
| 8                          | -1.003137000 | -1.238794000 | 2.698092000  | 8                          | 0.331695000  | -1.762002000 | 2.674448000  |
| 6                          | -0.640701000 | -1.100367000 | 1.586965000  | 6                          | 0.374928000  | -1.367875000 | 1.564877000  |
| 44                         | -0.142224000 | -0.910686000 | -0.159222000 | 44                         | 0.425793000  | -0.820021000 | -0.175457000 |
| 7                          | 2.064505000  | -0.913214000 | 0.184867000  | 7                          | 2.033847000  | 0.629113000  | 0.093456000  |
| 1                          | -0.297277000 | -2.674325000 | -0.749391000 | 1                          | 1.374412000  | -2.234666000 | -0.983080000 |
| 6                          | 0.198064000  | 1.081702000  | 0.027138000  | 6                          | -0.657593000 | 0.823393000  | 0.110600000  |
| 6                          | -0.830993000 | 2.041026000  | 0.135063000  | 6                          | -2.057732000 | 0.739268000  | 0.173254000  |
| 6                          | 1.536173000  | 1.499421000  | -0.112560000 | 6                          | -0.013081000 | 2.063821000  | -0.025024000 |
| 6                          | -2.240415000 | 1.510257000  | 0.203126000  | 6                          | -2.603524000 | -0.664288000 | 0.177523000  |
| 6                          | 2.519983000  | 0.395362000  | -0.425806000 | 6                          | 1.450122000  | 1.954072000  | -0.392722000 |
| 6                          | -0.512736000 | 3.410954000  | 0.137025000  | 6                          | -2.822763000 | 1.917107000  | 0.181806000  |
| 6                          | 1.855305000  | 2.865180000  | -0.077453000 | 6                          | -0.771481000 | 3.244244000  | 0.013786000  |
| 1                          | -1.302945000 | 4.165776000  | 0.207571000  | 1                          | -3.916751000 | 1.879626000  | 0.221947000  |
| 1                          | 2.894218000  | 3.198740000  | -0.174208000 | 1                          | -0.293693000 | 4.225649000  | -0.079144000 |
| 6                          | 0.828960000  | 3.816123000  | 0.056488000  | 6                          | -2.171300000 | 3.163073000  | 0.137995000  |
| 1                          | 1.075026000  | 4.880986000  | 0.079158000  | 1                          | -2.763772000 | 4.081197000  | 0.165999000  |
| 1                          | 2.534764000  | 0.227408000  | -1.515272000 | 1                          | 1.533783000  | 1.927187000  | -1.491535000 |
| 1                          | 3.552750000  | 0.617689000  | -0.092903000 | 1                          | 2.077737000  | 2.784142000  | -0.016232000 |
| 1                          | -2.993127000 | 2.191585000  | -0.222538000 | 1                          | -3.591551000 | -0.750569000 | -0.308574000 |
| 8                          | 0.468505000  | -1.184503000 | -2.312894000 | 8                          | 0.799120000  | -0.527558000 | -2.379190000 |
| 1                          | -0.236496000 | -0.865474000 | -2.903828000 | 1                          | -0.039723000 | -0.692266000 | -2.846006000 |
| 1                          | -0.002367000 | -2.184358000 | -1.585160000 | 1                          | 1.171014000  | -1.609622000 | -1.781996000 |
| 6                          | 2.774775000  | -2.037098000 | -0.481844000 | 6                          | 3.245864000  | 0.312366000  | -0.713081000 |
| 1                          | 3.870942000  | -1.915814000 | -0.378086000 | 1                          | 3.984185000  | 1.133944000  | -0.633090000 |
| 1                          | 2.497236000  | -2.051811000 | -1.543552000 | 1                          | 2.947459000  | 0.172768000  | -1.759762000 |
| 6                          | 2.403976000  | -0.911798000 | 1.634270000  | 6                          | 2.429547000  | 0.785667000  | 1.522313000  |

|                            |              |              |              |                            |              |              |              |
|----------------------------|--------------|--------------|--------------|----------------------------|--------------|--------------|--------------|
| 1                          | 1.932323000  | -0.046372000 | 2.117476000  | 1                          | 1.552997000  | 1.087872000  | 2.109232000  |
| 1                          | 2.031654000  | -1.834510000 | 2.098591000  | 1                          | 2.810178000  | -0.170740000 | 1.902564000  |
| 6                          | -3.690562000 | -0.945120000 | 0.017482000  | 6                          | -2.002728000 | -2.921286000 | -0.471024000 |
| 1                          | -4.609286000 | -0.376790000 | -0.188175000 | 1                          | -3.021871000 | -3.081195000 | -0.864862000 |
| 1                          | -3.526838000 | -1.048201000 | 1.098324000  | 1                          | -1.945248000 | -3.260211000 | 0.577767000  |
| 1                          | -3.758588000 | -1.939609000 | -0.442782000 | 1                          | -1.271284000 | -3.469056000 | -1.077072000 |
| 1                          | 2.468756000  | -2.981659000 | -0.011878000 | 1                          | 3.689005000  | -0.617911000 | -0.333350000 |
| 1                          | 3.501926000  | -0.852927000 | 1.767380000  | 1                          | 3.218034000  | 1.557282000  | 1.610961000  |
| 1                          | -2.534347000 | 1.238929000  | 1.231509000  | 1                          | -2.669881000 | -1.077940000 | 1.202990000  |
| SCS-TS                     |              |              |              | OCS-TS                     |              |              |              |
| E(RB-P86) = -1469.91868836 |              |              |              | E(RB-P86) = -1146.88364267 |              |              |              |
| 16                         | -2.218947000 | 0.668224000  | -0.662547000 | 8                          | -1.523340000 | -1.778479000 | -0.239266000 |
| 8                          | -1.162578000 | -1.094207000 | 2.661426000  | 8                          | 1.056788000  | -1.016227000 | 2.755552000  |
| 6                          | -0.873861000 | -1.003194000 | 1.525792000  | 6                          | 0.824231000  | -0.938907000 | 1.606396000  |
| 44                         | -0.469141000 | -0.871293000 | -0.258024000 | 44                         | 0.479288000  | -0.823308000 | -0.195068000 |
| 16                         | 1.733228000  | -1.856960000 | -0.112986000 | 16                         | 2.078898000  | 0.784415000  | -0.646380000 |
| 1                          | -1.288748000 | -2.402417000 | -0.921875000 | 1                          | 1.397458000  | -2.332632000 | -0.859663000 |
| 6                          | 0.568445000  | 0.887190000  | -0.007877000 | 6                          | -0.719445000 | 0.781050000  | 0.075985000  |
| 6                          | -0.101363000 | 2.102548000  | 0.273207000  | 6                          | -2.106764000 | 0.540356000  | 0.153082000  |
| 6                          | 1.962295000  | 0.921616000  | -0.249867000 | 6                          | -0.245361000 | 2.110350000  | 0.042241000  |
| 6                          | -1.596662000 | 2.039088000  | 0.455961000  | 6                          | -2.543265000 | -0.890324000 | 0.333163000  |
| 6                          | 2.630082000  | -0.344385000 | -0.728047000 | 6                          | 1.247983000  | 2.313965000  | 0.076569000  |
| 6                          | 0.608733000  | 3.312879000  | 0.348832000  | 6                          | -3.015965000 | 1.609746000  | 0.135095000  |
| 6                          | 2.673946000  | 2.128864000  | -0.135792000 | 6                          | -1.157875000 | 3.179621000  | 0.022826000  |
| 1                          | 0.083372000  | 4.251356000  | 0.554378000  | 1                          | -4.094751000 | 1.425454000  | 0.179482000  |
| 1                          | 3.755338000  | 2.148335000  | -0.308929000 | 1                          | -0.799141000 | 4.213185000  | -0.021089000 |
| 6                          | 1.999410000  | 3.319937000  | 0.169719000  | 6                          | -2.537641000 | 2.927385000  | 0.066272000  |
| 1                          | 2.555687000  | 4.257518000  | 0.248799000  | 1                          | -3.243500000 | 3.761443000  | 0.042962000  |
| 1                          | 2.537301000  | -0.448707000 | -1.821234000 | 1                          | 1.590234000  | 3.185972000  | -0.502057000 |
| 1                          | 3.693395000  | -0.427503000 | -0.451480000 | 1                          | 1.616103000  | 2.407200000  | 1.112807000  |
| 1                          | -2.111186000 | 2.977131000  | 0.196936000  | 1                          | -3.504755000 | -1.117506000 | -0.161832000 |
| 8                          | -0.083330000 | -1.155954000 | -2.440419000 | 8                          | 0.351327000  | -0.974808000 | -2.407097000 |
| 1                          | -0.651421000 | -0.546879000 | -2.945422000 | 1                          | -0.571508000 | -1.236495000 | -2.581999000 |
| 1                          | -0.868102000 | -2.009628000 | -1.728572000 | 1                          | 0.993925000  | -1.941577000 | -1.653040000 |
| 6                          | 2.242110000  | -1.809731000 | 1.647740000  | 6                          | 3.560931000  | 0.702634000  | 0.431401000  |
| 1                          | 2.057251000  | -0.810327000 | 2.062233000  | 1                          | 3.273505000  | 0.634719000  | 1.488855000  |
| 1                          | 3.306525000  | -2.076010000 | 1.716357000  | 1                          | 4.183215000  | 1.591289000  | 0.249798000  |
| 6                          | -3.799921000 | 0.245837000  | 0.166468000  | 6                          | -1.718476000 | -3.155841000 | 0.144164000  |
| 1                          | -4.488655000 | 1.100101000  | 0.094421000  | 1                          | -2.731426000 | -3.480798000 | -0.149954000 |
| 1                          | -3.622926000 | -0.028687000 | 1.214726000  | 1                          | -1.583690000 | -3.276485000 | 1.233154000  |
| 1                          | -4.217443000 | -0.612969000 | -0.375364000 | 1                          | -0.964153000 | -3.742561000 | -0.393453000 |
| 1                          | 1.638972000  | -2.554788000 | 2.182292000  | 1                          | 4.111672000  | -0.199751000 | 0.134975000  |
| 1                          | -1.877660000 | 1.737543000  | 1.479427000  | 1                          | -2.632547000 | -1.140655000 | 1.409448000  |
| PCS-TS                     |              |              |              | OCO-TS                     |              |              |              |
| E(RB-P86) = -1453.02572133 |              |              |              | E(RB-P86) = -823.842874246 |              |              |              |
| 15                         | -2.127109000 | -0.416989000 | -0.367017000 | 8                          | -0.624080000 | 1.991139000  | -0.658330000 |
| 8                          | -0.631924000 | -1.160810000 | 2.983264000  | 8                          | -1.503140000 | 0.541582000  | 2.816506000  |
| 6                          | -0.352638000 | -1.056872000 | 1.849035000  | 6                          | -1.279965000 | 0.306006000  | 1.687237000  |
| 44                         | 0.074150000  | -0.938690000 | 0.068445000  | 44                         | -0.960311000 | -0.075775000 | -0.073459000 |
| 16                         | 2.464160000  | -0.727320000 | 0.541059000  | 8                          | -0.423179000 | -2.142304000 | 0.346097000  |
| 1                          | 0.074104000  | -2.730125000 | -0.376372000 | 1                          | -2.714215000 | -0.283736000 | -0.761363000 |
| 6                          | 0.187212000  | 1.137973000  | 0.106784000  | 6                          | 1.006577000  | 0.068557000  | 0.109121000  |
| 6                          | -0.960839000 | 1.961075000  | 0.240440000  | 6                          | 1.611822000  | 1.331000000  | 0.000205000  |
| 6                          | 1.444141000  | 1.763933000  | -0.083119000 | 6                          | 1.774688000  | -1.104571000 | 0.138739000  |
| 6                          | -2.300809000 | 1.269570000  | 0.412918000  | 6                          | 0.646529000  | 2.484325000  | -0.065298000 |
| 6                          | 2.650383000  | 0.899674000  | -0.354394000 | 6                          | 1.004293000  | -2.398995000 | 0.055807000  |
| 6                          | -0.848009000 | 3.361084000  | 0.199259000  | 6                          | 3.011134000  | 1.429830000  | -0.039088000 |
| 6                          | 1.552619000  | 3.166053000  | -0.090227000 | 6                          | 3.176017000  | -1.007274000 | 0.133765000  |
| 1                          | -1.741395000 | 3.987168000  | 0.295563000  | 1                          | 3.508173000  | 2.401086000  | -0.133728000 |
| 1                          | 2.531559000  | 3.639252000  | -0.221251000 | 1                          | 3.803361000  | -1.904421000 | 0.170117000  |
| 6                          | 0.409017000  | 3.963299000  | 0.049324000  | 6                          | 3.784238000  | 0.258305000  | 0.053874000  |
| 1                          | 0.496686000  | 5.052949000  | 0.037522000  | 1                          | 4.874634000  | 0.330622000  | 0.042975000  |
| 1                          | 2.699399000  | 0.627048000  | -1.421421000 | 1                          | 1.060287000  | -2.812266000 | -0.968544000 |
| 1                          | 3.597957000  | 1.370960000  | -0.050633000 | 1                          | 1.347390000  | -3.166956000 | 0.772571000  |
| 1                          | -3.143474000 | 1.842146000  | -0.010489000 | 1                          | 0.997602000  | 3.321426000  | -0.693775000 |

|   |              |              |              |   |              |              |              |
|---|--------------|--------------|--------------|---|--------------|--------------|--------------|
| 8 | 0.751210000  | -1.313571000 | -2.059238000 | 8 | -1.014163000 | -0.756685000 | -2.206685000 |
| 1 | 0.043215000  | -1.132781000 | -2.700378000 | 1 | -0.779084000 | -0.009772000 | -2.785733000 |
| 1 | 0.349358000  | -2.291375000 | -1.237603000 | 1 | -2.122898000 | -0.488805000 | -1.568335000 |
| 6 | 3.429300000  | -1.803034000 | -0.588009000 | 6 | -1.269263000 | -3.205942000 | -0.150890000 |
| 1 | 4.471626000  | -1.453983000 | -0.618912000 | 1 | -2.278146000 | -2.997494000 | 0.224539000  |
| 1 | 2.962833000  | -1.790574000 | -1.582676000 | 1 | -0.907638000 | -4.169619000 | 0.247293000  |
| 6 | -2.581034000 | -0.136375000 | -2.138530000 | 6 | -1.683560000 | 2.968671000  | -0.553214000 |
| 6 | -3.543066000 | -1.411119000 | 0.276070000  | 1 | -1.373086000 | 3.897774000  | -1.061606000 |
| 1 | -4.504646000 | -0.903795000 | 0.096541000  | 1 | -1.917881000 | 3.172350000  | 0.505415000  |
| 1 | -3.410355000 | -1.572968000 | 1.355581000  | 1 | -2.557967000 | 2.533649000  | -1.050916000 |
| 1 | -3.550765000 | -2.392992000 | -0.220096000 | 1 | -1.265508000 | -3.207152000 | -1.252853000 |
| 1 | -1.879856000 | 0.590113000  | -2.575460000 | 1 | 0.400087000  | 2.868099000  | 0.943865000  |
| 1 | -3.606353000 | 0.257768000  | -2.223383000 |   |              |              |              |
| 1 | -2.516936000 | -1.081374000 | -2.699103000 |   |              |              |              |
| 1 | 3.393634000  | -2.815126000 | -0.163078000 |   |              |              |              |
| 1 | -2.521056000 | 1.095499000  | 1.482855000  |   |              |              |              |

### Hydrogen eliminated products

|                            |              |              |              |                            |              |              |              |
|----------------------------|--------------|--------------|--------------|----------------------------|--------------|--------------|--------------|
| <b>PNN-P</b>               |              |              |              | <b>NNN-P</b>               |              |              |              |
| E(RB-P86) = -1165.52522591 |              |              |              | E(RB-P86) = -878.834011233 |              |              |              |
| 15                         | -2.266867000 | 0.046208000  | -0.194816000 | 7                          | -2.241901000 | -0.281716000 | -0.236573000 |
| 8                          | -0.467516000 | -1.136076000 | 2.922793000  | 8                          | -0.335361000 | -1.213733000 | 2.910973000  |
| 6                          | -0.333364000 | -1.047586000 | 1.762139000  | 6                          | -0.270594000 | -1.093833000 | 1.745328000  |
| 44                         | -0.139611000 | -0.903575000 | -0.091246000 | 44                         | -0.123943000 | -0.906932000 | -0.106018000 |
| 7                          | 2.141843000  | -1.120411000 | -0.073578000 | 7                          | 2.104439000  | -0.786821000 | -0.075518000 |
| 1                          | -0.234079000 | -2.645616000 | -0.254886000 | 1                          | 0.082509000  | -2.650549000 | -0.287008000 |
| 7                          | 0.438432000  | 1.073591000  | -0.033377000 | 7                          | 0.127285000  | 1.081395000  | -0.040290000 |
| 6                          | -0.513229000 | 2.083669000  | 0.146829000  | 6                          | -1.032726000 | 1.842702000  | 0.126522000  |
| 6                          | 1.761428000  | 1.349411000  | -0.188998000 | 6                          | 1.367759000  | 1.613160000  | -0.155024000 |
| 6                          | -1.867787000 | 1.737365000  | 0.143026000  | 6                          | -2.228236000 | 1.160564000  | 0.098418000  |
| 6                          | 2.584614000  | 0.179795000  | -0.671937000 | 6                          | 2.392019000  | 0.600165000  | -0.610315000 |
| 6                          | -0.003011000 | 3.421448000  | 0.310455000  | 6                          | -0.824793000 | 3.264211000  | 0.308542000  |
| 6                          | 2.269827000  | 2.632406000  | -0.044527000 | 6                          | 1.590417000  | 2.971538000  | 0.006656000  |
| 1                          | -0.718145000 | 4.227023000  | 0.489823000  | 1                          | -1.692725000 | 3.904989000  | 0.478737000  |
| 1                          | 3.337164000  | 2.822361000  | -0.164018000 | 1                          | 2.591299000  | 3.394017000  | -0.085335000 |
| 6                          | 1.348069000  | 3.679366000  | 0.230670000  | 6                          | 0.445259000  | 3.792009000  | 0.260681000  |
| 1                          | 1.713569000  | 4.701830000  | 0.362415000  | 1                          | 0.582441000  | 4.867769000  | 0.403577000  |
| 1                          | 2.413954000  | 0.080692000  | -1.756418000 | 1                          | 2.323375000  | 0.517003000  | -1.706569000 |
| 1                          | 3.664661000  | 0.339415000  | -0.492011000 | 1                          | 3.422653000  | 0.896177000  | -0.342766000 |
| 1                          | -2.637556000 | 2.501419000  | 0.268596000  | 1                          | -3.203810000 | 1.641597000  | 0.192018000  |
| 8                          | 0.139139000  | -0.864091000 | -2.157711000 | 8                          | 0.137514000  | -0.803837000 | -2.170244000 |
| 1                          | 0.017398000  | 0.042551000  | -2.488445000 | 1                          | 0.055493000  | 0.123507000  | -2.454642000 |
| 1                          | -1.041586000 | -2.354523000 | -0.414344000 | 1                          | -0.757083000 | -2.521250000 | -0.424072000 |
| 6                          | 2.594918000  | -2.233113000 | -0.946851000 | 6                          | 2.731957000  | -1.786691000 | -0.984002000 |
| 1                          | 3.690678000  | -2.188802000 | -1.105397000 | 1                          | 3.807818000  | -1.564247000 | -1.120414000 |
| 1                          | 2.061465000  | -2.145535000 | -1.904735000 | 1                          | 2.194045000  | -1.745889000 | -1.942443000 |
| 6                          | 2.712163000  | -1.264897000 | 1.288285000  | 6                          | 2.687841000  | -0.906911000 | 1.288088000  |
| 1                          | 2.415910000  | -0.405430000 | 1.904846000  | 1                          | 2.282325000  | -0.115737000 | 1.932433000  |
| 1                          | 2.330057000  | -2.184292000 | 1.752063000  | 1                          | 2.429162000  | -1.884862000 | 1.714346000  |
| 6                          | -3.154696000 | -0.121619000 | -1.812109000 | 6                          | -2.801924000 | -0.487775000 | -1.614363000 |
| 6                          | -3.565377000 | -0.510195000 | 0.997620000  | 6                          | -3.141436000 | -0.998078000 | 0.718814000  |
| 1                          | -4.445614000 | 0.148366000  | 0.920425000  | 1                          | -4.170584000 | -0.604533000 | 0.622019000  |
| 1                          | -3.169366000 | -0.460043000 | 2.020764000  | 1                          | -2.791459000 | -0.833875000 | 1.743799000  |
| 1                          | -3.873195000 | -1.544074000 | 0.776995000  | 1                          | -3.147016000 | -2.074785000 | 0.491684000  |
| 1                          | -2.453851000 | 0.100583000  | -2.627295000 | 1                          | -2.141809000 | -0.019649000 | -2.349955000 |
| 1                          | -4.006061000 | 0.576836000  | -1.847694000 | 1                          | -3.812017000 | -0.042458000 | -1.662334000 |
| 1                          | -3.519829000 | -1.152725000 | -1.939563000 | 1                          | -2.858953000 | -1.563843000 | -1.835944000 |
| 1                          | 2.345987000  | -3.190188000 | -0.465970000 | 1                          | 2.629394000  | -2.785881000 | -0.536836000 |
| 1                          | 3.818071000  | -1.312882000 | 1.242344000  | 1                          | 3.789175000  | -0.808289000 | 1.239272000  |
| <b>PNP-P</b>               |              |              |              | <b>SNS-P</b>               |              |              |              |
| E(RB-P86) = -1452.18874098 |              |              |              | E(RB-P86) = -1485.97892114 |              |              |              |
| 15                         | -2.385110000 | -0.457610000 | -0.218775000 | 16                         | -2.012931000 | -1.535171000 | -0.005217000 |
| 8                          | -0.290273000 | -1.004129000 | 3.012890000  | 8                          | -0.002143000 | -0.859649000 | 3.211481000  |
| 6                          | -0.212535000 | -0.970301000 | 1.846079000  | 6                          | 0.116214000  | -0.882816000 | 2.051673000  |
| 44                         | -0.055584000 | -0.900189000 | -0.016926000 | 44                         | 0.323092000  | -0.907802000 | 0.181069000  |

|                            |              |              |              |                            |              |              |              |
|----------------------------|--------------|--------------|--------------|----------------------------|--------------|--------------|--------------|
| 15                         | 2.303413000  | -0.712146000 | -0.062419000 | 16                         | 2.459866000  | 0.206107000  | 0.335162000  |
| 1                          | 0.270203000  | -2.601385000 | -0.116704000 | 1                          | 1.307998000  | -2.365541000 | 0.272904000  |
| 7                          | 0.048006000  | 1.214510000  | -0.063687000 | 7                          | -0.402762000 | 1.009219000  | -0.081862000 |
| 6                          | -1.148296000 | 1.943219000  | 0.071424000  | 6                          | -1.790435000 | 1.203193000  | -0.022424000 |
| 6                          | 1.242754000  | 1.872003000  | -0.202513000 | 6                          | 0.448358000  | 2.072507000  | -0.210309000 |
| 6                          | -2.381033000 | 1.284578000  | 0.046487000  | 6                          | -2.643181000 | 0.109218000  | 0.001488000  |
| 6                          | 2.441367000  | 1.051301000  | -0.624524000 | 6                          | 1.881746000  | 1.748054000  | -0.533754000 |
| 6                          | -1.041337000 | 3.372216000  | 0.227199000  | 6                          | -2.264332000 | 2.566863000  | 0.029550000  |
| 6                          | 1.354795000  | 3.250121000  | -0.067299000 | 6                          | 0.010035000  | 3.386617000  | -0.166532000 |
| 1                          | -1.962878000 | 3.937060000  | 0.382620000  | 1                          | -3.340202000 | 2.732106000  | 0.116070000  |
| 1                          | 2.326757000  | 3.731119000  | -0.183643000 | 1                          | 0.720381000  | 4.207566000  | -0.268786000 |
| 6                          | 0.177962000  | 4.004093000  | 0.176443000  | 6                          | -1.387621000 | 3.621989000  | -0.027718000 |
| 1                          | 0.240111000  | 5.088838000  | 0.302384000  | 1                          | -1.763029000 | 4.647842000  | 0.019471000  |
| 1                          | 2.446568000  | 0.988175000  | -1.727310000 | 1                          | 1.973874000  | 1.510879000  | -1.606008000 |
| 1                          | 3.385363000  | 1.520604000  | -0.305019000 | 1                          | 2.556867000  | 2.577220000  | -0.279196000 |
| 1                          | -3.304637000 | 1.863324000  | 0.119351000  | 1                          | -3.721029000 | 0.217320000  | 0.116058000  |
| 8                          | 0.258736000  | -0.882932000 | -2.106448000 | 8                          | 0.628890000  | -0.972473000 | -1.884660000 |
| 1                          | -0.093094000 | -0.041840000 | -2.446220000 | 1                          | 0.159673000  | -0.208085000 | -2.264368000 |
| 1                          | -0.603111000 | -2.526137000 | -0.238441000 | 1                          | 0.513261000  | -2.654555000 | 0.126324000  |
| 6                          | 3.213314000  | -1.680394000 | -1.331085000 | 6                          | 3.509574000  | -0.496597000 | -0.997044000 |
| 1                          | 4.198175000  | -1.240223000 | -1.553598000 | 1                          | 4.280247000  | 0.237197000  | -1.272568000 |
| 1                          | 2.572965000  | -1.678474000 | -2.226981000 | 1                          | 3.990120000  | -1.391921000 | -0.579374000 |
| 6                          | 3.330406000  | -0.817319000 | 1.468354000  | 6                          | -2.246827000 | -2.171163000 | -1.741247000 |
| 1                          | 2.916652000  | -0.138043000 | 2.228033000  | 1                          | -1.409906000 | -1.823957000 | -2.363173000 |
| 1                          | 3.294815000  | -1.842047000 | 1.867379000  | 1                          | -3.219906000 | -1.806709000 | -2.095532000 |
| 6                          | -3.177224000 | -0.888739000 | -1.837855000 | 1                          | -2.251744000 | -3.269355000 | -1.678003000 |
| 6                          | -3.548589000 | -1.242115000 | 0.987693000  | 1                          | 2.840562000  | -0.756441000 | -1.833626000 |
| 1                          | -4.555322000 | -0.807862000 | 0.875987000  |                            |              |              |              |
| 1                          | -3.191291000 | -1.056267000 | 2.009749000  |                            |              |              |              |
| 1                          | -3.607755000 | -2.328233000 | 0.816227000  |                            |              |              |              |
| 1                          | -2.506612000 | -0.581839000 | -2.651766000 |                            |              |              |              |
| 1                          | -4.146017000 | -0.373703000 | -1.936916000 |                            |              |              |              |
| 1                          | -3.331370000 | -1.977048000 | -1.907719000 |                            |              |              |              |
| 1                          | 3.349930000  | -2.714193000 | -0.979577000 |                            |              |              |              |
| 1                          | 4.378460000  | -0.544243000 | 1.266697000  |                            |              |              |              |
| SNN-P                      |              |              |              | ONP-P                      |              |              |              |
| E(RB-P86) = -1182.41337214 |              |              |              | E(RB-P86) = -1146.04218271 |              |              |              |
| 16                         | -2.329339000 | -0.959894000 | 0.215375000  | 8                          | -1.927571000 | -1.548291000 | -0.531133000 |
| 8                          | 0.145381000  | -1.071119000 | 3.072275000  | 8                          | 0.415235000  | -1.758149000 | 2.675470000  |
| 6                          | 0.125826000  | -1.025679000 | 1.903745000  | 6                          | 0.343222000  | -1.459161000 | 1.545435000  |
| 44                         | 0.077527000  | -0.964094000 | 0.030376000  | 44                         | 0.221940000  | -0.936160000 | -0.255463000 |
| 7                          | 2.203353000  | -0.346245000 | -0.214722000 | 15                         | 2.078763000  | 0.379308000  | -0.121910000 |
| 1                          | 0.676349000  | -2.620073000 | -0.036407000 | 1                          | 1.377601000  | -2.139420000 | -0.826054000 |
| 7                          | -0.158631000 | 1.055868000  | -0.068022000 | 7                          | -0.743019000 | 0.834048000  | 0.163861000  |
| 6                          | -1.406769000 | 1.626708000  | 0.195137000  | 6                          | -2.139175000 | 0.798266000  | -0.025543000 |
| 6                          | 0.937631000  | 1.807767000  | -0.360248000 | 6                          | -0.098546000 | 2.000926000  | 0.465372000  |
| 6                          | -2.505581000 | 0.793652000  | 0.354651000  | 6                          | -2.746236000 | -0.398192000 | -0.311068000 |
| 6                          | 2.096412000  | 0.998065000  | -0.887503000 | 6                          | 1.382147000  | 1.873162000  | 0.748582000  |
| 6                          | -1.442491000 | 3.067228000  | 0.290498000  | 6                          | -2.851740000 | 2.058269000  | 0.073017000  |
| 6                          | 0.920030000  | 3.191418000  | -0.294561000 | 6                          | -0.764085000 | 3.211039000  | 0.561791000  |
| 1                          | -2.392193000 | 3.545865000  | 0.538274000  | 1                          | -3.931293000 | 2.054465000  | -0.093292000 |
| 1                          | 1.812111000  | 3.772433000  | -0.531036000 | 1                          | -0.218795000 | 4.122118000  | 0.808969000  |
| 6                          | -0.311157000 | 3.816495000  | 0.061435000  | 6                          | -2.180717000 | 3.218014000  | 0.354800000  |
| 1                          | -0.360296000 | 4.906321000  | 0.137835000  | 1                          | -2.730789000 | 4.160868000  | 0.421169000  |
| 1                          | 1.906972000  | 0.784341000  | -1.951618000 | 1                          | 1.930779000  | 2.792628000  | 0.490464000  |
| 1                          | 3.054966000  | 1.541410000  | -0.799649000 | 1                          | 1.534476000  | 1.684773000  | 1.827572000  |
| 1                          | -3.488506000 | 1.163603000  | 0.643082000  | 1                          | -3.801587000 | -0.535874000 | -0.540258000 |
| 8                          | 0.082260000  | -0.985314000 | -2.053386000 | 8                          | 0.121916000  | -0.404560000 | -2.250663000 |
| 1                          | -0.276217000 | -0.135698000 | -2.365560000 | 1                          | -0.717715000 | 0.073589000  | -2.376825000 |
| 1                          | -0.175055000 | -2.695443000 | -0.132354000 | 1                          | 0.635231000  | -2.559141000 | -0.837756000 |
| 6                          | 2.948033000  | -1.272528000 | -1.112044000 | 6                          | 2.773297000  | 0.937754000  | -1.725349000 |
| 1                          | 3.924769000  | -0.835105000 | -1.394756000 | 1                          | 3.353514000  | 0.115566000  | -2.170223000 |
| 1                          | 2.323207000  | -1.447580000 | -2.000032000 | 1                          | 3.421259000  | 1.817671000  | -1.589526000 |
| 6                          | 2.927190000  | -0.193196000 | 1.075617000  | 6                          | 3.543012000  | -0.108542000 | 0.882256000  |
| 1                          | 2.412089000  | 0.548426000  | 1.700420000  | 1                          | 3.218008000  | -0.422532000 | 1.884418000  |
| 1                          | 2.945603000  | -1.155913000 | 1.602761000  | 1                          | 4.052586000  | -0.954869000 | 0.397901000  |

|                                     |              |              |              |                                     |              |              |              |
|-------------------------------------|--------------|--------------|--------------|-------------------------------------|--------------|--------------|--------------|
| 6                                   | -3.007520000 | -1.400545000 | -1.460850000 | 6                                   | -2.455050000 | -2.736460000 | 0.105428000  |
| 1                                   | -2.279403000 | -1.134714000 | -2.236834000 | 1                                   | -3.484429000 | -2.902834000 | -0.253084000 |
| 1                                   | -3.961364000 | -0.868813000 | -1.576403000 | 1                                   | -2.453904000 | -2.625014000 | 1.202142000  |
| 1                                   | -3.177044000 | -2.487479000 | -1.457863000 | 1                                   | -1.817999000 | -3.576388000 | -0.201764000 |
| 1                                   | 3.123159000  | -2.219099000 | -0.581065000 | 1                                   | 1.922889000  | 1.144191000  | -2.390735000 |
| 1                                   | 3.965306000  | 0.143734000  | 0.891487000  | 1                                   | 4.251097000  | 0.730822000  | 0.971167000  |
| ONS-P<br>E(RB-P86) = -1162.93443336 |              |              |              | ONN-P<br>E(RB-P86) = -859.363167301 |              |              |              |
| 8                                   | -0.984839000 | -2.135880000 | -0.217455000 | 8                                   | -1.620990000 | -1.571657000 | -0.644007000 |
| 8                                   | 0.247243000  | -1.002174000 | 3.132648000  | 8                                   | 0.089637000  | -1.578014000 | 2.744744000  |
| 6                                   | 0.413842000  | -0.891294000 | 1.983457000  | 6                                   | 0.217246000  | -1.286652000 | 1.616633000  |
| 44                                  | 0.679262000  | -0.718344000 | 0.126680000  | 44                                  | 0.414171000  | -0.856926000 | -0.197531000 |
| 16                                  | 1.958758000  | 1.233670000  | 0.405445000  | 7                                   | 2.037461000  | 0.566566000  | 0.070584000  |
| 1                                   | 2.261759000  | -1.527656000 | 0.218785000  | 1                                   | 1.695017000  | -2.091854000 | -0.320569000 |
| 7                                   | -0.861501000 | 0.577785000  | -0.134641000 | 7                                   | -0.652911000 | 0.828906000  | -0.062859000 |
| 6                                   | -2.136064000 | -0.018585000 | -0.131774000 | 6                                   | -2.044081000 | 0.703514000  | -0.015527000 |
| 6                                   | -0.698713000 | 1.931831000  | -0.142064000 | 6                                   | -0.006170000 | 2.018913000  | -0.061490000 |
| 6                                   | -2.206697000 | -1.384125000 | -0.215042000 | 6                                   | -2.555112000 | -0.560205000 | -0.188065000 |
| 6                                   | 0.711488000  | 2.400457000  | -0.376900000 | 6                                   | 1.446639000  | 1.872220000  | -0.438870000 |
| 6                                   | -3.272732000 | 0.876397000  | -0.019937000 | 6                                   | -2.777618000 | 1.933814000  | 0.201127000  |
| 6                                   | -1.771129000 | 2.801993000  | -0.056755000 | 6                                   | -0.683660000 | 3.210311000  | 0.135515000  |
| 1                                   | -4.272977000 | 0.442169000  | 0.041410000  | 1                                   | -3.865694000 | 1.891035000  | 0.284301000  |
| 1                                   | -1.616930000 | 3.880737000  | -0.087289000 | 1                                   | -0.157706000 | 4.165157000  | 0.140057000  |
| 6                                   | -3.085462000 | 2.233318000  | 0.020305000  | 6                                   | -2.107442000 | 3.131375000  | 0.286870000  |
| 1                                   | -3.950842000 | 2.895730000  | 0.109242000  | 1                                   | -2.677018000 | 4.050349000  | 0.451654000  |
| 1                                   | 0.943789000  | 2.370140000  | -1.453672000 | 1                                   | 1.495620000  | 1.799817000  | -1.536860000 |
| 1                                   | 0.889900000  | 3.412301000  | 0.013467000  | 1                                   | 2.067597000  | 2.716172000  | -0.089606000 |
| 1                                   | -3.110171000 | -1.989632000 | -0.183607000 | 1                                   | -3.601655000 | -0.829994000 | -0.308687000 |
| 8                                   | 0.996620000  | -0.605750000 | -1.920347000 | 8                                   | 0.731016000  | -0.441741000 | -2.203253000 |
| 1                                   | 0.225850000  | -0.145672000 | -2.299461000 | 1                                   | -0.119843000 | -0.218672000 | -2.619229000 |
| 1                                   | 1.721791000  | -2.163801000 | 0.075885000  | 1                                   | 1.017506000  | -2.467566000 | -0.662087000 |
| 6                                   | 3.226533000  | 1.237451000  | -0.925423000 | 6                                   | 3.223947000  | 0.231130000  | -0.768167000 |
| 1                                   | 3.529400000  | 2.275546000  | -1.122818000 | 1                                   | 3.935428000  | 1.078176000  | -0.776824000 |
| 1                                   | 4.086045000  | 0.671374000  | -0.541037000 | 1                                   | 2.864213000  | 0.011165000  | -1.783149000 |
| 6                                   | -0.882165000 | -3.057623000 | -1.344101000 | 6                                   | 2.451903000  | 0.740791000  | 1.490295000  |
| 1                                   | -1.837729000 | -3.596870000 | -1.432350000 | 1                                   | 1.589702000  | 1.070239000  | 2.084365000  |
| 1                                   | -0.073515000 | -3.760739000 | -1.102004000 | 1                                   | 2.820471000  | -0.214922000 | 1.884648000  |
| 1                                   | -0.641533000 | -2.506022000 | -2.263711000 | 6                                   | -2.027631000 | -2.902662000 | -0.255229000 |
| 1                                   | 2.782415000  | 0.737863000  | -1.800779000 | 1                                   | -3.039919000 | -3.092766000 | -0.649445000 |
| ONO-P<br>E(RB-P86) = -839.892394869 |              |              |              | PNS-P<br>E(RB-P86) = -1469.08953697 |              |              |              |
| 8                                   | 0.765301000  | -1.936142000 | -0.752671000 | 15                                  | -2.238101000 | -0.062715000 | -0.348573000 |
| 8                                   | 1.352505000  | -0.620339000 | 2.829834000  | 8                                   | -0.649609000 | -0.780967000 | 3.074664000  |
| 6                                   | 1.214931000  | -0.365010000 | 1.697311000  | 6                                   | -0.444585000 | -0.833949000 | 1.925556000  |
| 44                                  | 0.982301000  | 0.104766000  | -0.109293000 | 44                                  | -0.104666000 | -0.912139000 | 0.083396000  |
| 8                                   | 0.360934000  | 2.148310000  | 0.396427000  | 16                                  | 2.341988000  | -1.203295000 | 0.484423000  |
| 1                                   | 2.682233000  | 0.681753000  | -0.119808000 | 1                                   | -0.144477000 | -2.661974000 | 0.103019000  |
| 7                                   | -0.997701000 | -0.100195000 | -0.029267000 | 7                                   | 0.419780000  | 1.106981000  | -0.039974000 |
| 6                                   | -1.492191000 | -1.401818000 | -0.136599000 | 6                                   | -0.599225000 | 2.071837000  | -0.052285000 |
| 6                                   | -1.781562000 | 0.992429000  | 0.111177000  | 6                                   | 1.733525000  | 1.478939000  | -0.075856000 |
| 6                                   | -0.565212000 | -2.388221000 | -0.377785000 | 6                                   | -1.931625000 | 1.663852000  | -0.161052000 |
| 6                                   | -1.037396000 | 2.291313000  | -0.056223000 | 6                                   | 2.738763000  | 0.398591000  | -0.369506000 |
| 6                                   | -2.923947000 | -1.546538000 | 0.016043000  | 6                                   | -0.198738000 | 3.452542000  | 0.044329000  |
| 6                                   | -3.152817000 | 0.881605000  | 0.275289000  | 6                                   | 2.134882000  | 2.805046000  | 0.019062000  |
| 1                                   | -3.363878000 | -2.543781000 | -0.047466000 | 1                                   | -0.983585000 | 4.211210000  | 0.073130000  |
| 1                                   | -3.778212000 | 1.764076000  | 0.410359000  | 1                                   | 3.195022000  | 3.059813000  | 0.001554000  |
| 6                                   | -3.708775000 | -0.437270000 | 0.229859000  | 6                                   | 1.129706000  | 3.804799000  | 0.096475000  |
| 1                                   | -4.788284000 | -0.563269000 | 0.350483000  | 1                                   | 1.414191000  | 4.857442000  | 0.179916000  |
| 1                                   | -1.001909000 | 2.541612000  | -1.131080000 | 1                                   | 2.684894000  | 0.147425000  | -1.441688000 |
| 1                                   | -1.489346000 | 3.115362000  | 0.520217000  | 1                                   | 3.758663000  | 0.711209000  | -0.104968000 |
| 1                                   | -0.755373000 | -3.434949000 | -0.599408000 | 1                                   | -2.733849000 | 2.403876000  | -0.190597000 |

|                            |              |              |              |                            |              |              |              |
|----------------------------|--------------|--------------|--------------|----------------------------|--------------|--------------|--------------|
| 8                          | 0.785870000  | 0.826569000  | -2.031611000 | 8                          | 0.369411000  | -1.098483000 | -1.946706000 |
| 1                          | 0.144143000  | 0.291947000  | -2.530687000 | 1                          | 0.258390000  | -0.234428000 | -2.379403000 |
| 1                          | 2.704164000  | -0.021226000 | -0.580884000 | 1                          | -0.949627000 | -2.417876000 | -0.125256000 |
| 6                          | 1.177849000  | 3.215347000  | -0.158240000 | 6                          | 2.912258000  | -2.357032000 | -0.822276000 |
| 1                          | 1.278831000  | 3.064081000  | -1.244652000 | 1                          | 3.977038000  | -2.179721000 | -1.029382000 |
| 1                          | 0.704522000  | 4.183662000  | 0.074652000  | 1                          | 2.273352000  | -2.186680000 | -1.704753000 |
| 6                          | 1.780880000  | -2.913812000 | -0.418879000 | 6                          | -2.945282000 | -0.454179000 | -2.014554000 |
| 1                          | 1.520648000  | -3.864679000 | -0.911814000 | 6                          | -3.623695000 | -0.556779000 | 0.770798000  |
| 1                          | 1.837376000  | -3.052218000 | 0.672488000  | 1                          | -4.520323000 | 0.039974000  | 0.537281000  |
| 1                          | 2.729225000  | -2.535870000 | -0.820825000 | 1                          | -3.333660000 | -0.373540000 | 1.814138000  |
| 1                          | 2.151095000  | 3.149820000  | 0.344631000  | 1                          | -3.862429000 | -1.623815000 | 0.641553000  |
|                            |              |              |              | 1                          | -2.173161000 | -0.289319000 | -2.777171000 |
|                            |              |              |              | 1                          | -3.815061000 | 0.192026000  | -2.214128000 |
|                            |              |              |              | 1                          | -3.255060000 | -1.510028000 | -2.057145000 |
|                            |              |              |              | 1                          | 2.781892000  | -3.373310000 | -0.425706000 |
| PCP-P                      |              |              |              | NCN-P                      |              |              |              |
| E(RB-P86) = -1436.14497663 |              |              |              | E(RB-P86) = -1149.47680453 |              |              |              |
| 15                         | -2.281782000 | -0.637693000 | -0.276537000 | 7                          | -2.184704000 | -0.995620000 | -0.308093000 |
| 8                          | -0.195258000 | -1.224395000 | 2.973730000  | 8                          | 0.005770000  | -1.358005000 | 2.913976000  |
| 6                          | -0.112464000 | -1.137075000 | 1.806214000  | 6                          | 0.019533000  | -1.214850000 | 1.747058000  |
| 44                         | 0.042706000  | -0.948420000 | -0.042586000 | 44                         | 0.098427000  | -0.933067000 | -0.092456000 |
| 15                         | 2.357044000  | -0.495380000 | -0.073302000 | 15                         | 2.242870000  | -0.098007000 | -0.074777000 |
| 1                          | 0.550087000  | -2.697671000 | -0.321467000 | 1                          | 0.905021000  | -2.564073000 | -0.456328000 |
| 6                          | -0.061679000 | 1.139356000  | 0.079698000  | 6                          | -0.375236000 | 1.041120000  | 0.091811000  |
| 6                          | -1.285605000 | 1.800078000  | 0.380467000  | 6                          | -1.734058000 | 1.350215000  | 0.326392000  |
| 6                          | 1.078211000  | 1.946259000  | -0.184960000 | 6                          | 0.553281000  | 2.091203000  | -0.091500000 |
| 6                          | -2.519594000 | 0.958289000  | 0.646385000  | 6                          | -2.646972000 | 0.165509000  | 0.532845000  |
| 6                          | 2.378450000  | 1.286960000  | -0.603976000 | 6                          | 1.989092000  | 1.727127000  | -0.422847000 |
| 6                          | -1.356804000 | 3.203119000  | 0.426223000  | 6                          | -2.163068000 | 2.683878000  | 0.389195000  |
| 6                          | 0.996057000  | 3.349211000  | -0.111744000 | 6                          | 0.118501000  | 3.427618000  | -0.002879000 |
| 1                          | -2.310015000 | 3.691792000  | 0.653716000  | 1                          | -3.218633000 | 2.919228000  | 0.562582000  |
| 1                          | 1.887544000  | 3.953950000  | -0.309265000 | 1                          | 0.835368000  | 4.245353000  | -0.133591000 |
| 6                          | -0.214969000 | 3.979477000  | 0.194670000  | 6                          | -1.230462000 | 3.722653000  | 0.238118000  |
| 1                          | -0.270951000 | 5.070219000  | 0.245241000  | 1                          | -1.558269000 | 4.763891000  | 0.297533000  |
| 1                          | 2.457552000  | 1.266490000  | -1.705133000 | 1                          | 2.188326000  | 1.870484000  | -1.499885000 |
| 1                          | 3.267142000  | 1.814232000  | -0.216677000 | 1                          | 2.726044000  | 2.337240000  | 0.127726000  |
| 1                          | -3.455569000 | 1.472735000  | 0.369855000  | 1                          | -3.706836000 | 0.397748000  | 0.305602000  |
| 8                          | 0.370726000  | -0.772308000 | -2.132406000 | 8                          | 0.322697000  | -0.650451000 | -2.166568000 |
| 1                          | 0.095644000  | 0.118520000  | -2.409081000 | 1                          | 0.048804000  | 0.255982000  | -2.390760000 |
| 1                          | -0.278938000 | -2.720606000 | -0.421238000 | 1                          | 0.103256000  | -2.753821000 | -0.519262000 |
| 6                          | 3.384965000  | -1.378724000 | -1.317319000 | 6                          | 3.410641000  | -0.677002000 | -1.373849000 |
| 1                          | 4.338410000  | -0.858222000 | -1.501150000 | 1                          | 4.266028000  | 0.008678000  | -1.483658000 |
| 1                          | 2.780967000  | -1.419655000 | -2.236647000 | 1                          | 2.831484000  | -0.737774000 | -2.307330000 |
| 6                          | 3.360145000  | -0.532878000 | 1.478925000  | 6                          | 3.240396000  | -0.130568000 | 1.479494000  |
| 1                          | 2.879668000  | 0.109626000  | 2.231381000  | 1                          | 2.667568000  | 0.346585000  | 2.287848000  |
| 1                          | 3.393837000  | -1.559111000 | 1.874077000  | 1                          | 3.441112000  | -1.172823000 | 1.768694000  |
| 6                          | -2.896375000 | -0.295130000 | -1.980807000 | 6                          | -2.594383000 | -0.778215000 | -1.720469000 |
| 6                          | -3.542608000 | -1.796290000 | 0.418322000  | 6                          | -2.801735000 | -2.250126000 | 0.186790000  |
| 1                          | -4.554228000 | -1.361474000 | 0.375670000  | 1                          | -3.908092000 | -2.180838000 | 0.167276000  |
| 1                          | -3.287846000 | -2.026564000 | 1.463108000  | 1                          | -2.467577000 | -2.446599000 | 1.214510000  |
| 1                          | -3.531627000 | -2.734780000 | -0.156212000 | 1                          | -2.490113000 | -3.085036000 | -0.456560000 |
| 1                          | -2.397019000 | 0.608129000  | -2.359532000 | 1                          | -2.293844000 | 0.229419000  | -2.033592000 |
| 1                          | -3.987009000 | -0.140246000 | -1.985411000 | 1                          | -3.694008000 | -0.875875000 | -1.812887000 |
| 1                          | -2.626678000 | -1.131349000 | -2.640974000 | 1                          | -2.080630000 | -1.498953000 | -2.368556000 |
| 1                          | 3.592603000  | -2.401858000 | -0.969000000 | 1                          | 3.781976000  | -1.679791000 | -1.113070000 |
| 1                          | 4.388114000  | -0.179188000 | 1.299948000  | 1                          | 4.196664000  | 0.399996000  | 1.345720000  |
| 1                          | -2.589807000 | 0.689323000  | 1.716981000  | 1                          | -2.595450000 | -0.168351000 | 1.584130000  |
| PCN-P                      |              |              |              | OCP-P                      |              |              |              |
| E(RB-P86) = -1149.47750543 |              |              |              | E(RB-P86) = -1130.01461333 |              |              |              |
| 15                         | -2.199161000 | -0.202916000 | -0.245988000 | 8                          | -2.050751000 | -1.322309000 | -0.590847000 |
| 8                          | -0.395290000 | -1.227466000 | 2.909240000  | 8                          | -0.041215000 | -1.471764000 | 2.822593000  |
| 6                          | -0.238376000 | -1.136244000 | 1.747799000  | 6                          | 0.037116000  | -1.296392000 | 1.663868000  |
| 44                         | -0.028887000 | -0.949634000 | -0.095206000 | 44                         | 0.182419000  | -0.951467000 | -0.167454000 |
| 7                          | 2.261752000  | -0.897617000 | -0.067694000 | 15                         | 2.120275000  | 0.221360000  | -0.002673000 |

|                            |              |              |              |                            |              |              |              |
|----------------------------|--------------|--------------|--------------|----------------------------|--------------|--------------|--------------|
| 1                          | 0.109694000  | -2.806986000 | -0.377795000 | 1                          | 1.296152000  | -2.419859000 | -0.494207000 |
| 6                          | 0.296546000  | 1.057056000  | 0.061478000  | 6                          | -0.652341000 | 0.897606000  | 0.021596000  |
| 6                          | -0.713337000 | 2.001001000  | 0.359861000  | 6                          | -2.059596000 | 0.966897000  | 0.116232000  |
| 6                          | 1.612633000  | 1.501113000  | -0.190524000 | 6                          | 0.092448000  | 2.097347000  | -0.044124000 |
| 6                          | -2.112106000 | 1.464673000  | 0.600705000  | 6                          | -2.810258000 | -0.336821000 | 0.171011000  |
| 6                          | 2.590860000  | 0.448891000  | -0.656465000 | 6                          | 1.589124000  | 1.997414000  | -0.266752000 |
| 6                          | -0.394615000 | 3.369871000  | 0.418535000  | 6                          | -2.713194000 | 2.207486000  | 0.172172000  |
| 6                          | 1.927622000  | 2.866303000  | -0.104177000 | 6                          | -0.567457000 | 3.336926000  | 0.041621000  |
| 1                          | -1.173922000 | 4.105873000  | 0.642762000  | 1                          | -3.805725000 | 2.254313000  | 0.233653000  |
| 1                          | 2.951136000  | 3.209968000  | -0.288965000 | 1                          | 0.009537000  | 4.266970000  | 0.003016000  |
| 6                          | 0.923173000  | 3.798269000  | 0.201063000  | 6                          | -1.963270000 | 3.392551000  | 0.155737000  |
| 1                          | 1.167095000  | 4.862125000  | 0.264226000  | 1                          | -2.468737000 | 4.360056000  | 0.212608000  |
| 1                          | 2.491488000  | 0.328256000  | -1.747032000 | 1                          | 1.838943000  | 2.244349000  | -1.313876000 |
| 1                          | 3.644553000  | 0.707381000  | -0.430510000 | 1                          | 2.170077000  | 2.678313000  | 0.379200000  |
| 1                          | -2.907392000 | 2.145118000  | 0.251455000  | 1                          | -3.822229000 | -0.258462000 | -0.267406000 |
| 8                          | 0.265275000  | -0.844982000 | -2.163429000 | 8                          | 0.426846000  | -0.589704000 | -2.204889000 |
| 1                          | 0.134522000  | 0.062829000  | -2.485471000 | 1                          | -0.206261000 | 0.104079000  | -2.460668000 |
| 1                          | -0.687765000 | -2.647680000 | -0.498370000 | 1                          | 0.557176000  | -2.746585000 | -0.623845000 |
| 6                          | 2.844766000  | -1.956302000 | -0.930291000 | 6                          | 3.392923000  | -0.104783000 | -1.288033000 |
| 1                          | 3.932033000  | -1.794905000 | -1.072569000 | 1                          | 4.139337000  | 0.704651000  | -1.326748000 |
| 1                          | 2.319369000  | -1.925854000 | -1.896326000 | 1                          | 2.850595000  | -0.190376000 | -2.241829000 |
| 6                          | 2.822267000  | -0.985197000 | 1.303699000  | 6                          | 3.053525000  | 0.236649000  | 1.588254000  |
| 1                          | 2.429674000  | -0.158770000 | 1.911183000  | 1                          | 2.386855000  | 0.568272000  | 2.397262000  |
| 1                          | 2.525792000  | -1.937700000 | 1.763572000  | 1                          | 3.402597000  | -0.779836000 | 1.822564000  |
| 6                          | -2.825318000 | 0.169306000  | -1.940852000 | 6                          | -2.637810000 | -2.632494000 | -0.531796000 |
| 6                          | -3.617382000 | -1.072547000 | 0.554865000  | 1                          | -3.681193000 | -2.591162000 | -0.891804000 |
| 1                          | -4.528878000 | -0.453828000 | 0.530016000  | 1                          | -2.614770000 | -3.032015000 | 0.498441000  |
| 1                          | -3.360477000 | -1.304044000 | 1.598652000  | 1                          | -2.046460000 | -3.272833000 | -1.198124000 |
| 1                          | -3.810756000 | -2.017976000 | 0.025982000  | 1                          | 3.901060000  | -1.056984000 | -1.072759000 |
| 1                          | -2.183497000 | 0.936964000  | -2.396077000 | 1                          | 3.920556000  | 0.913582000  | 1.526119000  |
| 1                          | -3.863714000 | 0.535528000  | -1.902737000 | 1                          | -2.904385000 | -0.706418000 | 1.212931000  |
| 1                          | -2.761690000 | -0.735296000 | -2.561243000 |                            |              |              |              |
| 1                          | 2.693259000  | -2.935234000 | -0.452025000 |                            |              |              |              |
| 1                          | 3.928317000  | -0.922771000 | 1.275480000  |                            |              |              |              |
| 1                          | -2.282941000 | 1.280376000  | 1.677871000  |                            |              |              |              |
| SCN-P                      |              |              |              | OCN-P                      |              |              |              |
| E(RB-P86) = -1166.36907936 |              |              |              | E(RB-P86) = -843.330975915 |              |              |              |
| 16                         | -2.277271000 | -0.142943000 | -0.814675000 | 8                          | -1.832382000 | -1.313933000 | -0.607679000 |
| 8                          | -0.945918000 | -1.157599000 | 2.730467000  | 8                          | -0.012929000 | -1.580929000 | 2.760046000  |
| 6                          | -0.603390000 | -1.087895000 | 1.606884000  | 6                          | 0.143756000  | -1.315704000 | 1.624002000  |
| 44                         | -0.128352000 | -0.929040000 | -0.185457000 | 44                         | 0.336191000  | -0.893785000 | -0.182501000 |
| 7                          | 2.085949000  | -0.913041000 | 0.125924000  | 7                          | 2.116031000  | 0.352050000  | 0.046076000  |
| 1                          | 0.043518000  | -2.821200000 | -0.410644000 | 1                          | 1.533833000  | -2.348194000 | -0.472759000 |
| 6                          | 0.182214000  | 1.056053000  | 0.000564000  | 6                          | -0.537625000 | 0.875051000  | 0.028913000  |
| 6                          | -0.861913000 | 1.993975000  | 0.131520000  | 6                          | -1.933115000 | 0.969368000  | 0.128789000  |
| 6                          | 1.516755000  | 1.497423000  | -0.088787000 | 6                          | 0.262420000  | 2.024435000  | -0.063464000 |
| 6                          | -2.265968000 | 1.449288000  | 0.182353000  | 6                          | -2.660877000 | -0.348299000 | 0.135995000  |
| 6                          | 2.523638000  | 0.426466000  | -0.425430000 | 6                          | 1.698113000  | 1.740585000  | -0.430061000 |
| 6                          | -0.563395000 | 3.367386000  | 0.196958000  | 6                          | -2.536535000 | 2.236292000  | 0.198532000  |
| 6                          | 1.813288000  | 2.864633000  | 0.013591000  | 6                          | -0.335217000 | 3.290108000  | 0.036475000  |
| 1                          | -1.368356000 | 4.104385000  | 0.285178000  | 1                          | -3.624827000 | 2.336040000  | 0.269807000  |
| 1                          | 2.850063000  | 3.213197000  | -0.042422000 | 1                          | 0.268519000  | 4.202062000  | -0.021622000 |
| 6                          | 0.771579000  | 3.796185000  | 0.160645000  | 6                          | -1.731571000 | 3.388222000  | 0.180406000  |
| 1                          | 1.001049000  | 4.862511000  | 0.231955000  | 1                          | -2.198977000 | 4.373528000  | 0.253090000  |
| 1                          | 2.540390000  | 0.299296000  | -1.519346000 | 1                          | 1.774520000  | 1.705603000  | -1.528157000 |
| 1                          | 3.547845000  | 0.652911000  | -0.070808000 | 1                          | 2.421803000  | 2.483353000  | -0.044539000 |
| 1                          | -3.020641000 | 2.133213000  | -0.235775000 | 1                          | -3.648916000 | -0.301628000 | -0.356279000 |
| 8                          | 0.455037000  | -0.849528000 | -2.184393000 | 8                          | 0.612207000  | -0.507502000 | -2.200798000 |
| 1                          | 0.046377000  | -0.107828000 | -2.661773000 | 1                          | -0.160673000 | -0.031167000 | -2.550085000 |
| 1                          | -0.721141000 | -2.681145000 | -0.640341000 | 1                          | 0.815821000  | -2.676116000 | -0.664532000 |
| 6                          | 2.759696000  | -1.987848000 | -0.651199000 | 6                          | 3.232321000  | -0.119840000 | -0.822192000 |
| 1                          | 3.857390000  | -1.840949000 | -0.644260000 | 1                          | 4.046325000  | 0.630118000  | -0.839472000 |
| 1                          | 2.371247000  | -1.951799000 | -1.679131000 | 1                          | 2.824252000  | -0.279056000 | -1.830512000 |
| 6                          | 2.471833000  | -1.002528000 | 1.558687000  | 6                          | 2.584230000  | 0.452524000  | 1.456413000  |
| 1                          | 2.025162000  | -0.163762000 | 2.108488000  | 1                          | 1.783082000  | 0.876925000  | 2.075004000  |
| 1                          | 2.102087000  | -1.946210000 | 1.981500000  | 1                          | 2.837356000  | -0.547470000 | 1.831347000  |



|                                     |              |              |              |                                     |              |              |              |
|-------------------------------------|--------------|--------------|--------------|-------------------------------------|--------------|--------------|--------------|
| 6                                   | -3.673259000 | -1.009152000 | 0.002777000  | 6                                   | -2.382465000 | -2.644116000 | -0.568409000 |
| 1                                   | -4.598294000 | -0.436090000 | -0.156701000 | 1                                   | -3.420975000 | -2.625085000 | -0.943010000 |
| 1                                   | -3.472561000 | -1.139297000 | 1.074540000  | 1                                   | -2.360192000 | -3.049767000 | 0.458533000  |
| 1                                   | -3.764076000 | -1.990285000 | -0.482176000 | 1                                   | -1.762374000 | -3.258828000 | -1.232163000 |
| 1                                   | 2.530029000  | -2.961186000 | -0.193349000 | 1                                   | 3.624882000  | -1.063688000 | -0.417282000 |
| 1                                   | 3.573727000  | -0.962352000 | 1.661325000  | 1                                   | 3.477317000  | 1.103979000  | 1.511030000  |
| 1                                   | -2.561040000 | 1.165816000  | 1.207198000  | 1                                   | -2.791154000 | -0.741244000 | 1.164166000  |
| SCS-P<br>E(RB-P86) = -1469.93515226 |              |              |              | OCS-P<br>E(RB-P86) = -1146.90109483 |              |              |              |
| 16                                  | -2.267137000 | 0.574602000  | -0.694991000 | 8                                   | -2.245522000 | 0.497710000  | -0.453275000 |
| 8                                   | -1.053501000 | -1.168139000 | 2.661965000  | 8                                   | -0.901316000 | -1.320822000 | 2.698754000  |
| 6                                   | -0.815364000 | -1.088232000 | 1.513572000  | 6                                   | -0.752972000 | -1.171720000 | 1.542366000  |
| 44                                  | -0.434821000 | -0.900432000 | -0.302767000 | 44                                  | -0.487941000 | -0.890100000 | -0.287425000 |
| 16                                  | 1.824317000  | -1.778166000 | -0.216794000 | 16                                  | 1.749364000  | -1.610971000 | -0.371735000 |
| 1                                   | -0.869139000 | -2.695319000 | -0.743552000 | 1                                   | -0.860215000 | -2.693040000 | -0.768563000 |
| 6                                   | 0.509175000  | 0.891469000  | -0.011939000 | 6                                   | 0.330101000  | 0.924608000  | 0.006143000  |
| 6                                   | -0.222804000 | 2.058854000  | 0.310605000  | 6                                   | -0.536402000 | 1.995074000  | 0.302731000  |
| 6                                   | 1.905341000  | 1.003508000  | -0.216421000 | 6                                   | 1.704587000  | 1.174982000  | -0.192810000 |
| 6                                   | -1.714519000 | 1.923790000  | 0.474596000  | 6                                   | -1.995804000 | 1.648343000  | 0.422597000  |
| 6                                   | 2.653044000  | -0.199343000 | -0.731801000 | 6                                   | 2.551536000  | 0.043677000  | -0.717139000 |
| 6                                   | 0.426464000  | 3.297334000  | 0.455398000  | 6                                   | -0.033134000 | 3.295787000  | 0.458523000  |
| 6                                   | 2.553364000  | 2.236762000  | -0.028161000 | 6                                   | 2.211035000  | 2.472762000  | 0.000948000  |
| 1                                   | -0.151855000 | 4.197034000  | 0.689520000  | 1                                   | -0.707062000 | 4.130538000  | 0.678198000  |
| 1                                   | 3.636520000  | 2.312021000  | -0.171002000 | 1                                   | 3.279076000  | 2.673213000  | -0.134504000 |
| 6                                   | 1.817083000  | 3.381012000  | 0.309715000  | 6                                   | 1.345746000  | 3.525765000  | 0.334843000  |
| 1                                   | 2.325157000  | 4.339607000  | 0.442144000  | 1                                   | 1.744589000  | 4.533705000  | 0.474263000  |
| 1                                   | 2.592091000  | -0.255466000 | -1.829380000 | 1                                   | 2.603136000  | 0.064690000  | -1.816722000 |
| 1                                   | 3.709660000  | -0.239713000 | -0.421804000 | 1                                   | 3.576974000  | 0.013294000  | -0.314606000 |
| 1                                   | -2.264005000 | 2.849112000  | 0.242859000  | 1                                   | -2.658594000 | 2.472615000  | 0.103292000  |
| 8                                   | 0.056213000  | -0.789528000 | -2.326414000 | 8                                   | -0.178110000 | -0.658692000 | -2.321444000 |
| 1                                   | -0.021552000 | 0.125872000  | -2.646722000 | 1                                   | -0.170798000 | 0.293210000  | -2.525487000 |
| 1                                   | -1.580671000 | -2.314593000 | -0.833161000 | 1                                   | -1.595933000 | -2.357332000 | -0.805577000 |
| 6                                   | 2.346101000  | -1.826623000 | 1.541812000  | 6                                   | 2.360350000  | -1.859548000 | 1.342842000  |
| 1                                   | 2.129394000  | -0.864771000 | 2.024164000  | 1                                   | 2.145071000  | -0.975733000 | 1.956873000  |
| 1                                   | 3.420045000  | -2.057207000 | 1.589118000  | 1                                   | 3.441230000  | -2.058346000 | 1.302946000  |
| 6                                   | -3.815980000 | 0.049437000  | 0.136354000  | 6                                   | -3.599033000 | 0.016627000  | -0.354859000 |
| 1                                   | -4.539709000 | 0.877025000  | 0.108631000  | 1                                   | -4.299806000 | 0.841592000  | -0.571559000 |
| 1                                   | -3.614651000 | -0.259913000 | 1.170766000  | 1                                   | -3.799348000 | -0.393802000 | 0.650735000  |
| 1                                   | -4.212034000 | -0.799230000 | -0.437099000 | 1                                   | -3.708301000 | -0.767311000 | -1.114180000 |
| 1                                   | 1.774451000  | -2.624784000 | 2.032734000  | 1                                   | 1.838374000  | -2.733165000 | 1.753642000  |
| 1                                   | -1.989592000 | 1.579899000  | 1.486318000  | 1                                   | -2.265278000 | 1.352074000  | 1.456291000  |
| PCS-P<br>E(RB-P86) = -1453.04448153 |              |              |              | OCO-P<br>E(RB-P86) = -823.861760477 |              |              |              |
| 15                                  | -2.147795000 | -0.335144000 | -0.395505000 | 8                                   | 0.689117000  | -1.961256000 | -0.706287000 |
| 8                                   | -0.598974000 | -0.991914000 | 3.048464000  | 8                                   | 1.359231000  | -0.526614000 | 2.865148000  |
| 6                                   | -0.354038000 | -0.996430000 | 1.902197000  | 6                                   | 1.230528000  | -0.290528000 | 1.722529000  |
| 44                                  | 0.025497000  | -0.962043000 | 0.072169000  | 44                                  | 0.984915000  | 0.116808000  | -0.087380000 |
| 16                                  | 2.468543000  | -0.910139000 | 0.474316000  | 8                                   | 0.373147000  | 2.181227000  | 0.344550000  |
| 1                                   | 0.255204000  | -2.815908000 | -0.050167000 | 1                                   | 2.786257000  | 0.748318000  | -0.267575000 |
| 6                                   | 0.250092000  | 1.092489000  | 0.085028000  | 6                                   | -0.974161000 | -0.090893000 | 0.048397000  |
| 6                                   | -0.856009000 | 1.972413000  | 0.216127000  | 6                                   | -1.538873000 | -1.372966000 | -0.012949000 |
| 6                                   | 1.542315000  | 1.656696000  | -0.059663000 | 6                                   | -1.776782000 | 1.056793000  | 0.100494000  |
| 6                                   | -2.236713000 | 1.361789000  | 0.365250000  | 6                                   | -0.541355000 | -2.496393000 | -0.084612000 |
| 6                                   | 2.717987000  | 0.751971000  | -0.329295000 | 6                                   | -1.048493000 | 2.367770000  | -0.025606000 |
| 6                                   | -0.668193000 | 3.365543000  | 0.211221000  | 6                                   | -2.935384000 | -1.516194000 | 0.010053000  |
| 6                                   | 1.721767000  | 3.051355000  | -0.025951000 | 6                                   | -3.172490000 | 0.913765000  | 0.159782000  |
| 1                                   | -1.531406000 | 4.032705000  | 0.304885000  | 1                                   | -3.400588000 | -2.505834000 | -0.045574000 |
| 1                                   | 2.728070000  | 3.473226000  | -0.118085000 | 1                                   | -3.823641000 | 1.792326000  | 0.217439000  |
| 6                                   | 0.619722000  | 3.905501000  | 0.104733000  | 6                                   | -3.742927000 | -0.370848000 | 0.118107000  |
| 1                                   | 0.764450000  | 4.988872000  | 0.122234000  | 1                                   | -4.829701000 | -0.479044000 | 0.155124000  |
| 1                                   | 2.789395000  | 0.526013000  | -1.405651000 | 1                                   | -1.067404000 | 2.706138000  | -1.077070000 |
| 1                                   | 3.673005000  | 1.174459000  | 0.019267000  | 1                                   | -1.447003000 | 3.165403000  | 0.626487000  |
| 1                                   | -3.033692000 | 1.979480000  | -0.082437000 | 1                                   | -0.879436000 | -3.348511000 | -0.700307000 |
| 8                                   | 0.538924000  | -1.007390000 | -1.965356000 | 8                                   | 0.787122000  | 0.738073000  | -2.044502000 |
| 1                                   | 0.418593000  | -0.126417000 | -2.358358000 | 1                                   | 0.045978000  | 0.279605000  | -2.476765000 |
| 1                                   | -0.539589000 | -2.705754000 | -0.239330000 | 1                                   | 2.846473000  | -0.018818000 | -0.518159000 |

|   |              |              |              |   |              |              |              |
|---|--------------|--------------|--------------|---|--------------|--------------|--------------|
| 6 | 3.205260000  | -1.966687000 | -0.830897000 | 6 | 1.190530000  | 3.218673000  | -0.256254000 |
| 1 | 4.244924000  | -1.657572000 | -1.010064000 | 1 | 2.178128000  | 3.148321000  | 0.217796000  |
| 1 | 2.569509000  | -1.860250000 | -1.725841000 | 1 | 0.743149000  | 4.202229000  | -0.033383000 |
| 6 | -2.569091000 | -0.084430000 | -2.172442000 | 6 | 1.766516000  | -2.919635000 | -0.684702000 |
| 6 | -3.601887000 | -1.254738000 | 0.272838000  | 1 | 1.424873000  | -3.860402000 | -1.149613000 |
| 1 | -4.537206000 | -0.698249000 | 0.100523000  | 1 | 2.102843000  | -3.106005000 | 0.349959000  |
| 1 | -3.466309000 | -1.417625000 | 1.351785000  | 1 | 2.580832000  | -2.487803000 | -1.278681000 |
| 1 | -3.672316000 | -2.235387000 | -0.221396000 | 1 | 1.258800000  | 3.040356000  | -1.341632000 |
| 1 | -1.924967000 | 0.707628000  | -2.580325000 | 1 | -0.267432000 | -2.864523000 | 0.923947000  |
| 1 | -3.625210000 | 0.207375000  | -2.287006000 |   |              |              |              |
| 1 | -2.364036000 | -1.008277000 | -2.730695000 |   |              |              |              |
| 1 | 3.191587000  | -2.998434000 | -0.453200000 |   |              |              |              |
| 1 | -2.488484000 | 1.215004000  | 1.432194000  |   |              |              |              |

### Non Pincer Complexes

|                            |              |              |              |                            |              |              |              |
|----------------------------|--------------|--------------|--------------|----------------------------|--------------|--------------|--------------|
| PNN-non                    |              |              |              | NNN-non                    |              |              |              |
| E(RB-P86) = -1091.43716500 |              |              |              | E(RB-P86) = -804.780715001 |              |              |              |
| 15                         | 0.509446000  | 2.222290000  | 0.213539000  | 8                          | -3.879817000 | -0.900279000 | -0.141960000 |
| 8                          | 3.924801000  | 0.497144000  | -0.248956000 | 6                          | -2.748648000 | -0.571363000 | -0.077217000 |
| 6                          | 2.777067000  | 0.264395000  | -0.140819000 | 44                         | -0.952835000 | -0.156767000 | 0.037578000  |
| 44                         | 0.950354000  | -0.013631000 | 0.034194000  | 7                          | -1.254545000 | 2.042054000  | -0.021280000 |
| 7                          | 1.098951000  | -2.304779000 | -0.039459000 | 1                          | -1.166002000 | -0.170046000 | 1.581017000  |
| 1                          | 1.207692000  | 0.027102000  | 1.570851000  | 7                          | 1.167089000  | 0.144281000  | 0.087774000  |
| 7                          | -1.176931000 | -0.229827000 | 0.126559000  | 6                          | 1.874294000  | 0.098342000  | -1.105209000 |
| 6                          | -1.888918000 | -0.215434000 | -1.062684000 | 6                          | 1.960420000  | 0.157818000  | 1.227230000  |
| 6                          | -1.956078000 | -0.137533000 | 1.269928000  | 6                          | -0.415783000 | 2.723121000  | 1.007128000  |
| 6                          | -3.254314000 | -0.158236000 | -1.156036000 | 6                          | 3.240250000  | 0.081492000  | -1.207391000 |
| 6                          | -3.324013000 | -0.079063000 | 1.268685000  | 6                          | 3.329946000  | 0.144504000  | 1.217299000  |
| 1                          | -3.717101000 | -0.167592000 | -2.147106000 | 1                          | 3.695775000  | 0.054296000  | -2.201506000 |
| 1                          | -3.847577000 | -0.025098000 | 2.227572000  | 1                          | 3.861765000  | 0.165415000  | 2.173030000  |
| 6                          | -4.100842000 | -0.097184000 | 0.032162000  | 6                          | 4.097796000  | 0.108703000  | -0.025213000 |
| 6                          | 1.860209000  | 3.390666000  | 0.688505000  | 1                          | -0.537605000 | 3.821135000  | 0.931111000  |
| 1                          | 2.308271000  | 3.059892000  | 1.636423000  | 1                          | 0.635561000  | 2.451518000  | 0.856464000  |
| 1                          | 2.644187000  | 3.378879000  | -0.082584000 | 6                          | -0.942217000 | -3.079364000 | 1.142886000  |
| 1                          | 1.475324000  | 4.415128000  | 0.803823000  | 1                          | -0.745013000 | -2.605065000 | 2.112323000  |
| 6                          | -0.290873000 | 3.045577000  | -1.239756000 | 1                          | -2.029262000 | -3.153153000 | 1.001914000  |
| 1                          | 0.389499000  | 3.012293000  | -2.103903000 | 1                          | -0.502590000 | -4.093576000 | 1.128177000  |
| 1                          | -1.213300000 | 2.500261000  | -1.489245000 | 6                          | -0.508792000 | -2.891260000 | -1.262659000 |
| 1                          | -0.539064000 | 4.093852000  | -1.012118000 | 1                          | -1.576211000 | -2.972225000 | -1.511876000 |
| 6                          | 0.248714000  | -2.910432000 | 1.020395000  | 1                          | -0.004175000 | -2.282447000 | -2.026435000 |
| 1                          | -0.783402000 | -2.558530000 | 0.903972000  | 1                          | -0.059108000 | -3.901223000 | -1.260669000 |
| 1                          | 0.279669000  | -4.016052000 | 0.953219000  | 6                          | -2.671541000 | 2.446828000  | 0.192299000  |
| 1                          | 0.624209000  | -2.597824000 | 2.004529000  | 1                          | -3.007750000 | 2.084505000  | 1.172330000  |
| 6                          | 2.492648000  | -2.790647000 | 0.132497000  | 1                          | -2.764461000 | 3.549895000  | 0.154819000  |
| 1                          | 2.882012000  | -2.447381000 | 1.100101000  | 1                          | -3.304551000 | 2.001290000  | -0.585729000 |
| 1                          | 2.523395000  | -3.897894000 | 0.096993000  | 6                          | -0.823537000 | 2.500260000  | -1.370211000 |
| 1                          | 3.128655000  | -2.386468000 | -0.666196000 | 1                          | -1.426857000 | 1.990242000  | -2.136668000 |
| 1                          | -1.398634000 | -0.125204000 | 2.210924000  | 1                          | -0.963110000 | 3.593952000  | -1.477454000 |
| 1                          | -0.459604000 | 2.503991000  | 1.224282000  | 1                          | 0.238977000  | 2.259837000  | -1.511291000 |
| 6                          | 0.595820000  | -2.734658000 | -1.369021000 | 7                          | -0.367755000 | -2.235035000 | 0.063154000  |
| 1                          | -0.453241000 | -2.427346000 | -1.477732000 | 1                          | 1.410830000  | 0.186447000  | 2.172923000  |
| 1                          | 1.203947000  | -2.268266000 | -2.159763000 | 1                          | -0.734025000 | 2.390296000  | 2.004189000  |
| 1                          | 0.659083000  | -3.835723000 | -1.479106000 | 1                          | 0.638532000  | -2.115999000 | 0.249538000  |
| 1                          | -1.283176000 | -0.253970000 | -1.978013000 | 1                          | 1.262345000  | 0.082848000  | -2.017648000 |
| 6                          | -5.470642000 | -0.056426000 | -0.011255000 | 6                          | 5.467655000  | 0.099266000  | -0.078007000 |
| 1                          | -6.008239000 | -0.069621000 | -0.961928000 | 1                          | 6.069666000  | 0.119174000  | 0.833041000  |
| 1                          | -6.065115000 | -0.010059000 | 0.903743000  | 1                          | 5.997954000  | 0.073664000  | -1.032507000 |
| PNP-non                    |              |              |              | SNS-non                    |              |              |              |
| E(RB-P86) = -1378.11131750 |              |              |              | E(RB-P86) = -1411.90152806 |              |              |              |
| 15                         | -1.047325000 | -2.409443000 | 0.127810000  | 8                          | 3.788845000  | 0.289756000  | -0.572992000 |
| 8                          | -3.858841000 | 0.297467000  | -0.360986000 | 6                          | 2.627077000  | 0.270602000  | -0.376615000 |
| 6                          | -2.701448000 | 0.144125000  | -0.224010000 | 44                         | 0.798923000  | 0.199168000  | -0.083985000 |
| 44                         | -0.865586000 | -0.072307000 | -0.014217000 | 1                          | 1.137624000  | 0.405444000  | 1.438068000  |
| 1                          | -1.118799000 | -0.002116000 | 1.531179000  | 7                          | -1.321528000 | 0.075276000  | -0.039278000 |
| 7                          | 1.253821000  | -0.337559000 | 0.024021000  | 6                          | -1.996875000 | -0.947315000 | -0.688662000 |

|                            |              |              |              |                            |              |              |              |
|----------------------------|--------------|--------------|--------------|----------------------------|--------------|--------------|--------------|
| 6                          | 2.022639000  | 0.185781000  | -1.001639000 | 6                          | -2.143551000 | 0.953686000  | 0.652412000  |
| 6                          | 1.978042000  | -0.912641000 | 1.054195000  | 6                          | 1.806003000  | -2.987949000 | -0.996157000 |
| 6                          | 0.953120000  | 2.827524000  | 0.999040000  | 6                          | -3.356322000 | -1.099937000 | -0.702949000 |
| 6                          | 3.391585000  | 0.148332000  | -1.048319000 | 6                          | -3.508511000 | 0.873605000  | 0.690033000  |
| 6                          | 3.344805000  | -0.997047000 | 1.086515000  | 1                          | -3.786211000 | -1.938199000 | -1.258387000 |
| 1                          | 3.901764000  | 0.580386000  | -1.914111000 | 1                          | -4.062475000 | 1.618909000  | 1.267819000  |
| 1                          | 3.820974000  | -1.472657000 | 1.948699000  | 6                          | -4.237110000 | -0.173399000 | -0.009317000 |
| 6                          | 4.176860000  | -0.472225000 | 0.011033000  | 1                          | 1.877873000  | -4.061437000 | -0.766983000 |
| 1                          | 1.025225000  | 3.926552000  | 1.027670000  | 1                          | 2.804758000  | -2.540191000 | -1.086464000 |
| 1                          | 1.849062000  | 2.407052000  | 0.519719000  | 6                          | 1.843095000  | 3.464224000  | 0.539992000  |
| 6                          | -2.538131000 | -3.153730000 | 0.930360000  | 1                          | 2.831081000  | 3.059126000  | 0.292487000  |
| 1                          | -2.622312000 | -2.769522000 | 1.957041000  | 1                          | 1.777047000  | 4.533240000  | 0.296182000  |
| 1                          | -3.437708000 | -2.848017000 | 0.376359000  | 1                          | 1.637547000  | 3.311876000  | 1.606695000  |
| 1                          | -2.478586000 | -4.252241000 | 0.954057000  | 6                          | 1.979442000  | -2.458943000 | 1.729777000  |
| 6                          | -0.912492000 | -3.336554000 | -1.472913000 | 1                          | 2.958673000  | -2.001717000 | 1.535741000  |
| 1                          | -1.738033000 | -3.037748000 | -2.135916000 | 1                          | 1.520180000  | -1.994932000 | 2.611456000  |
| 1                          | 0.038804000  | -3.071931000 | -1.956919000 | 1                          | 2.071881000  | -3.544043000 | 1.883710000  |
| 1                          | -0.947964000 | -4.425364000 | -1.313860000 | 16                         | 0.516180000  | 2.556407000  | -0.367239000 |
| 1                          | -1.904878000 | 3.207929000  | 0.941318000  | 16                         | 0.837179000  | -2.153689000 | 0.326352000  |
| 6                          | -2.017983000 | 2.807896000  | 1.959388000  | 1                          | 1.252566000  | -2.851196000 | -1.934667000 |
| 1                          | -1.681419000 | 4.285375000  | 0.994270000  | 1                          | -1.626289000 | 1.743053000  | 1.202434000  |
| 1                          | -2.854812000 | 3.057712000  | 0.408014000  | 1                          | 1.007158000  | 2.829331000  | -1.614086000 |
| 6                          | -0.417054000 | 3.230853000  | -1.517759000 | 1                          | -1.366829000 | -1.650622000 | -1.241763000 |
| 1                          | -1.319357000 | 3.057921000  | -2.123081000 | 6                          | -5.606485000 | -0.280856000 | -0.007517000 |
| 1                          | -0.306568000 | 4.311835000  | -1.332559000 | 1                          | -6.112707000 | -1.077900000 | -0.556258000 |
| 1                          | 0.456637000  | 2.875908000  | -2.083670000 | 1                          | -6.228868000 | 0.425099000  | 0.546445000  |
| 15                         | -0.552802000 | 2.289245000  | 0.076933000  |                            |              |              |              |
| 1                          | 0.902013000  | 2.436337000  | 2.025491000  |                            |              |              |              |
| 1                          | 1.380268000  | -1.294256000 | 1.886243000  |                            |              |              |              |
| 1                          | -0.000030000 | -3.039555000 | 0.866297000  |                            |              |              |              |
| 1                          | 1.458786000  | 0.627845000  | -1.831479000 |                            |              |              |              |
| 6                          | 5.547799000  | -0.546207000 | -0.003182000 |                            |              |              |              |
| 1                          | 6.098715000  | -1.002890000 | 0.821782000  |                            |              |              |              |
| 1                          | 6.127926000  | -0.147693000 | -0.838276000 |                            |              |              |              |
| SNN-non                    |              |              |              | ONP-non                    |              |              |              |
| E(RB-P86) = -1108.33487645 |              |              |              | E(RB-P86) = -1072.00971502 |              |              |              |
| 8                          | -3.867811000 | -1.331067000 | -0.108603000 | 8                          | 3.975116000  | 0.589225000  | -0.180128000 |
| 6                          | -2.782968000 | -0.877103000 | -0.100155000 | 6                          | 2.801598000  | 0.557270000  | -0.150138000 |
| 44                         | -1.023174000 | -0.288743000 | -0.034946000 | 44                         | 0.945375000  | 0.491557000  | -0.059668000 |
| 1                          | -1.143817000 | -0.513566000 | 1.501021000  | 1                          | 1.110504000  | 0.453261000  | 1.488733000  |
| 7                          | 1.042615000  | 0.266030000  | 0.001628000  | 7                          | -1.188865000 | 0.621729000  | 0.016693000  |
| 6                          | 1.761951000  | 0.195815000  | -1.183073000 | 6                          | -1.879382000 | 0.359749000  | -1.164431000 |
| 6                          | 1.818528000  | 0.426637000  | 1.138933000  | 6                          | -1.954057000 | 0.504481000  | 1.174370000  |
| 6                          | -0.805618000 | 2.575792000  | 1.145787000  | 6                          | -0.589806000 | -2.584450000 | 0.496357000  |
| 6                          | 3.123568000  | 0.308499000  | -1.278187000 | 6                          | -3.203717000 | 0.028844000  | -1.234123000 |
| 6                          | 3.182511000  | 0.552974000  | 1.134951000  | 6                          | -3.283582000 | 0.189727000  | 1.190561000  |
| 1                          | 3.589748000  | 0.248216000  | -2.265749000 | 1                          | -3.657055000 | -0.136901000 | -2.215631000 |
| 1                          | 3.699588000  | 0.687406000  | 2.089557000  | 1                          | -3.803227000 | 0.147601000  | 2.152208000  |
| 6                          | 3.961012000  | 0.520466000  | -0.100639000 | 6                          | -4.031758000 | -0.076362000 | -0.035380000 |
| 1                          | -1.051817000 | 3.655136000  | 1.128881000  | 1                          | -0.479923000 | -3.680600000 | 0.492366000  |
| 1                          | 0.271299000  | 2.439869000  | 0.994588000  | 1                          | -1.360933000 | -2.285228000 | -0.229279000 |
| 6                          | 1.099028000  | -2.916817000 | 0.845013000  | 6                          | 1.118278000  | 3.781443000  | 0.355527000  |
| 1                          | 0.762392000  | -2.726871000 | 1.870669000  | 1                          | 2.182657000  | 3.791589000  | 0.090895000  |
| 1                          | 1.380165000  | -3.968895000 | 0.702678000  | 1                          | 0.653345000  | 4.730530000  | 0.044506000  |
| 1                          | 1.943989000  | -2.260234000 | 0.603168000  | 1                          | 1.013313000  | 3.643099000  | 1.443364000  |
| 6                          | -3.006036000 | 2.109116000  | 0.270154000  | 6                          | 2.189631000  | -2.501319000 | 1.294091000  |
| 1                          | -3.576403000 | 1.641573000  | -0.542587000 | 1                          | 3.210870000  | -2.161852000 | 1.068178000  |
| 1                          | -3.319187000 | 1.665670000  | 1.224283000  | 1                          | 1.925859000  | -2.154181000 | 2.303582000  |
| 1                          | -3.212085000 | 3.196908000  | 0.284394000  | 1                          | 2.154535000  | -3.601875000 | 1.266382000  |
| 16                         | -0.237323000 | -2.500941000 | -0.356754000 | 8                          | 0.520020000  | 2.682084000  | -0.371836000 |
| 7                          | -1.550858000 | 1.866063000  | 0.068046000  | 6                          | 1.494508000  | -2.611325000 | -1.505261000 |
| 6                          | -1.144312000 | 2.427635000  | -1.250026000 | 1                          | 0.786674000  | -2.332156000 | -2.299972000 |
| 1                          | -0.061547000 | 2.295418000  | -1.378599000 | 1                          | 2.501013000  | -2.282729000 | -1.802834000 |
| 1                          | -1.682683000 | 1.898555000  | -2.051636000 | 1                          | 1.487926000  | -3.707289000 | -1.389174000 |
| 1                          | -1.390535000 | 3.505699000  | -1.309304000 | 15                         | 1.009640000  | -1.771226000 | 0.073919000  |

|                            |              |              |              |                            |              |              |              |
|----------------------------|--------------|--------------|--------------|----------------------------|--------------|--------------|--------------|
| 1                          | -1.093578000 | 2.153354000  | 2.117874000  | 1                          | -0.922206000 | -2.251638000 | 1.489894000  |
| 1                          | 1.263674000  | 0.443449000  | 2.081553000  | 1                          | -1.411776000 | 0.696683000  | 2.104563000  |
| 1                          | -1.184766000 | -3.329557000 | 0.170940000  | 1                          | -0.430896000 | 2.567835000  | -0.130244000 |
| 1                          | 1.163796000  | 0.040772000  | -2.090384000 | 1                          | -1.285994000 | 0.453140000  | -2.083047000 |
| 6                          | 5.323342000  | 0.664210000  | -0.150054000 | 6                          | -5.365113000 | -0.388208000 | -0.060912000 |
| 1                          | 5.862359000  | 0.633106000  | -1.099429000 | 1                          | -5.949117000 | -0.454564000 | 0.859605000  |
| 1                          | 5.910366000  | 0.814275000  | 0.758653000  | 1                          | -5.885310000 | -0.576497000 | -1.002614000 |
| ONS-non                    |              |              |              | ONN-non                    |              |              |              |
| E(RB-P86) = -1088.89215062 |              |              |              | E(RB-P86) = -785.322828770 |              |              |              |
| 8                          | -4.153594000 | 0.214284000  | 0.209076000  | 8                          | -4.047358000 | 0.255944000  | 0.257977000  |
| 6                          | -2.990182000 | 0.077182000  | 0.170156000  | 6                          | -2.872327000 | 0.220211000  | 0.184645000  |
| 44                         | -1.146162000 | -0.170205000 | 0.161505000  | 44                         | -1.031575000 | 0.248241000  | 0.052264000  |
| 1                          | -1.264397000 | -0.103394000 | 1.709347000  | 1                          | -1.238852000 | 0.366538000  | -1.487238000 |
| 7                          | 0.931908000  | -0.705903000 | 0.119547000  | 7                          | 1.101425000  | 0.618512000  | -0.006752000 |
| 6                          | 1.586726000  | -0.510429000 | -1.093725000 | 6                          | 1.794762000  | 0.341657000  | 1.170417000  |
| 6                          | 1.769519000  | -0.731156000 | 1.233160000  | 6                          | 1.887439000  | 0.602411000  | -1.156904000 |
| 6                          | -0.521682000 | 2.633004000  | -1.578955000 | 6                          | 0.429595000  | -2.321187000 | -0.710406000 |
| 6                          | 2.937493000  | -0.354179000 | -1.235366000 | 6                          | 3.131764000  | 0.067316000  | 1.242801000  |
| 6                          | 3.128045000  | -0.597921000 | 1.177457000  | 6                          | 3.229781000  | 0.348914000  | -1.171435000 |
| 1                          | 3.355302000  | -0.225281000 | -2.238066000 | 1                          | 3.583819000  | -0.116680000 | 2.221759000  |
| 1                          | 3.701690000  | -0.656560000 | 2.106823000  | 1                          | 3.763197000  | 0.383908000  | -2.125847000 |
| 6                          | 3.836319000  | -0.393597000 | -0.084233000 | 6                          | 3.976320000  | 0.055690000  | 0.050454000  |
| 1                          | -0.322881000 | 3.714351000  | -1.611389000 | 1                          | 0.477404000  | -3.424592000 | -0.774735000 |
| 1                          | -1.443031000 | 2.412604000  | -2.134163000 | 1                          | 1.249687000  | -1.953850000 | -0.080961000 |
| 6                          | -1.801085000 | -3.178056000 | -0.820360000 | 6                          | -1.484315000 | 3.408517000  | -0.394413000 |
| 1                          | -1.495381000 | -2.842749000 | -1.825721000 | 1                          | -2.558525000 | 3.327332000  | -0.189143000 |
| 1                          | -1.538326000 | -4.238756000 | -0.683420000 | 1                          | -1.122644000 | 4.403296000  | -0.089703000 |
| 1                          | -2.884423000 | -3.051343000 | -0.704721000 | 1                          | -1.301336000 | 3.243885000  | -1.467674000 |
| 6                          | 0.867383000  | 2.491735000  | 0.823605000  | 6                          | -1.965766000 | -2.496207000 | -0.973139000 |
| 1                          | 0.861834000  | 2.212688000  | 1.884579000  | 1                          | -2.944458000 | -2.261461000 | -0.537017000 |
| 1                          | 1.631205000  | 1.908494000  | 0.292031000  | 1                          | -1.910841000 | -2.061481000 | -1.979127000 |
| 1                          | 1.049069000  | 3.571879000  | 0.725182000  | 1                          | -1.841380000 | -3.594102000 | -1.036044000 |
| 16                         | -0.812523000 | 2.134679000  | 0.171543000  | 8                          | -0.827743000 | 2.395523000  | 0.408609000  |
| 8                          | -1.175776000 | -2.388002000 | 0.220424000  | 6                          | -0.987555000 | -2.471563000 | 1.247687000  |
| 1                          | 0.325752000  | 2.073278000  | -1.999141000 | 1                          | -0.177002000 | -2.061619000 | 1.867715000  |
| 1                          | 1.257425000  | -0.877245000 | 2.188359000  | 1                          | -1.959516000 | -2.200518000 | 1.681317000  |
| 1                          | -0.188490000 | -2.418631000 | 0.136711000  | 1                          | -0.891051000 | -3.574267000 | 1.224645000  |
| 1                          | 0.937953000  | -0.503017000 | -1.980143000 | 7                          | -0.884461000 | -1.908010000 | -0.129226000 |
| 6                          | 5.194948000  | -0.255259000 | -0.182384000 | 1                          | 0.534061000  | -1.890727000 | -1.714022000 |
| 1                          | 5.833430000  | -0.291728000 | 0.702843000  | 1                          | 1.347821000  | 0.817004000  | -2.084183000 |
| 1                          | 5.681479000  | -0.107332000 | -1.148984000 | 1                          | 0.143279000  | 2.347113000  | 0.199415000  |
| ONO-non                    |              |              |              | PNS-non                    |              |              |              |
| E(RB-P86) = -765.851691753 |              |              |              | E(RB-P86) = -1395.00533080 |              |              |              |
| 8                          | 4.011482000  | 0.671636000  | -0.516988000 | 15                         | -1.497066000 | 1.988625000  | -0.033788000 |
| 6                          | 2.870699000  | 0.466251000  | -0.295046000 | 8                          | -3.848883000 | -1.106872000 | 0.092626000  |
| 44                         | 1.053979000  | 0.244334000  | -0.002261000 | 6                          | -2.726579000 | -0.770733000 | 0.032801000  |
| 1                          | 1.410312000  | 0.414935000  | 1.514614000  | 44                         | -0.942904000 | -0.232096000 | -0.073939000 |
| 7                          | -1.033021000 | 0.025219000  | -0.004764000 | 16                         | -0.254654000 | -2.607096000 | -0.319126000 |
| 6                          | -1.702762000 | -0.959527000 | 0.710214000  | 1                          | -1.161572000 | -0.182783000 | -1.622434000 |
| 6                          | -1.854233000 | 0.871738000  | -0.740201000 | 7                          | 1.088758000  | 0.384301000  | -0.078049000 |
| 6                          | 0.972858000  | -2.564171000 | -1.139621000 | 6                          | 1.877833000  | 0.040592000  | 1.005599000  |
| 6                          | -3.060256000 | -1.124512000 | 0.709321000  | 6                          | 1.751914000  | 1.048252000  | -1.095441000 |
| 6                          | -3.217494000 | 0.771420000  | -0.793899000 | 6                          | 3.219136000  | 0.301631000  | 1.107525000  |
| 1                          | -3.492435000 | -1.928583000 | 1.312216000  | 6                          | 3.086607000  | 1.355155000  | -1.073481000 |
| 1                          | -3.772723000 | 1.479300000  | -1.416087000 | 1                          | 3.750064000  | -0.005555000 | 2.013168000  |
| 6                          | -3.943432000 | -0.257787000 | -0.060451000 | 1                          | 3.518507000  | 1.880085000  | -1.930269000 |
| 1                          | 0.816979000  | -3.641633000 | -0.963865000 | 6                          | 3.943821000  | 1.001904000  | 0.052814000  |
| 1                          | 1.861288000  | -2.400647000 | -1.772840000 | 6                          | -3.064616000 | 2.549977000  | -0.834096000 |
| 6                          | 0.112722000  | 3.065247000  | 0.963658000  | 1                          | -3.061355000 | 2.237567000  | -1.888080000 |
| 1                          | 0.779981000  | 2.999076000  | 1.835423000  | 1                          | -3.919937000 | 2.069875000  | -0.336841000 |
| 1                          | -0.083544000 | 4.113164000  | 0.689242000  | 1                          | -3.172887000 | 3.643567000  | -0.776053000 |
| 1                          | -0.827631000 | 2.542821000  | 1.169226000  | 6                          | -1.550127000 | 2.785738000  | 1.638082000  |

|                                       |              |              |              |                                       |              |              |              |
|---------------------------------------|--------------|--------------|--------------|---------------------------------------|--------------|--------------|--------------|
| 6                                     | 2.203543000  | -2.485676000 | 0.923526000  | 1                                     | -2.336125000 | 2.310469000  | 2.243455000  |
| 1                                     | 3.175685000  | -2.340901000 | 0.423449000  | 1                                     | -0.581391000 | 2.634806000  | 2.135936000  |
| 1                                     | 2.198219000  | -1.970000000 | 1.890047000  | 1                                     | -1.752136000 | 3.865289000  | 1.559650000  |
| 1                                     | 1.994977000  | -3.560313000 | 1.057295000  | 6                                     | 0.188231000  | -3.338830000 | 1.308753000  |
| 8                                     | 0.706394000  | 2.383971000  | -0.186639000 | 1                                     | -0.714820000 | -3.306536000 | 1.933053000  |
| 8                                     | 1.138187000  | -1.900352000 | 0.138065000  | 1                                     | 0.492043000  | -4.385629000 | 1.162288000  |
| 1                                     | 0.079990000  | -2.127248000 | -1.603327000 | 1                                     | 0.998665000  | -2.771043000 | 1.785685000  |
| 1                                     | -1.332081000 | 1.643030000  | -1.313942000 | 1                                     | 1.135564000  | 1.306798000  | -1.960961000 |
| 1                                     | 1.560115000  | 2.806640000  | -0.384530000 | 1                                     | -0.536881000 | 2.820512000  | -0.685419000 |
| 1                                     | -1.060725000 | -1.614500000 | 1.303338000  | 6                                     | 1.391991000  | -2.645225000 | -1.123547000 |
| 6                                     | -5.307955000 | -0.396061000 | -0.090511000 | 1                                     | 1.260527000  | -2.214093000 | -2.124053000 |
| 1                                     | -5.932590000 | 0.273997000  | -0.685268000 | 1                                     | 2.119893000  | -2.047810000 | -0.558799000 |
| 1                                     | -5.810375000 | -1.179941000 | 0.480406000  | 1                                     | 1.715082000  | -3.692572000 | -1.210949000 |
|                                       |              |              |              | 1                                     | 1.352331000  | -0.453567000 | 1.832659000  |
|                                       |              |              |              | 6                                     | 5.283393000  | 1.292763000  | 0.116660000  |
|                                       |              |              |              | 1                                     | 5.881900000  | 1.017836000  | 0.987846000  |
|                                       |              |              |              | 1                                     | 5.790895000  | 1.806664000  | -0.702424000 |
| PCP-non<br>E(RB-P86) = -1362.07995056 |              |              |              | NCN-non<br>E(RB-P86) = -788.712908272 |              |              |              |
| 15                                    | 2.349457000  | -0.556195000 | 0.078911000  | 7                                     | -0.644088000 | 2.239696000  | -0.038471000 |
| 8                                     | -0.001624000 | -3.768897000 | -0.381111000 | 8                                     | -3.768235000 | 0.000155000  | 0.261825000  |
| 6                                     | -0.001026000 | -2.601992000 | -0.259218000 | 6                                     | -2.596672000 | 0.000105000  | 0.119681000  |
| 44                                    | -0.000303000 | -0.709918000 | -0.061666000 | 44                                    | -0.713209000 | 0.000008000  | -0.049611000 |
| 1                                     | -0.000414000 | -0.920589000 | 1.485903000  | 7                                     | -0.644295000 | -2.239639000 | -0.038468000 |
| 6                                     | 0.000979000  | 2.269574000  | 1.163850000  | 1                                     | -0.901139000 | 0.000058000  | -1.600727000 |
| 6                                     | 0.000872000  | 2.096378000  | -1.229156000 | 6                                     | 2.282057000  | -0.000093000 | -1.203397000 |
| 6                                     | 0.001591000  | 3.671743000  | 1.065587000  | 6                                     | 2.095198000  | -0.000064000 | 1.184083000  |
| 6                                     | 0.001478000  | 3.496840000  | -1.343942000 | 6                                     | 3.682224000  | -0.000117000 | -1.100096000 |
| 1                                     | 0.001864000  | 4.281356000  | 1.975641000  | 6                                     | 3.496603000  | -0.000091000 | 1.308252000  |
| 1                                     | 0.001655000  | 3.964720000  | -2.334224000 | 1                                     | 4.296858000  | -0.000133000 | -2.006977000 |
| 6                                     | 0.001848000  | 4.294763000  | -0.190555000 | 1                                     | 3.959320000  | -0.000088000 | 2.301177000  |
| 6                                     | 3.311091000  | -2.137427000 | 0.172028000  | 6                                     | 4.300107000  | -0.000118000 | 0.160254000  |
| 1                                     | 2.975772000  | -2.713663000 | 1.047012000  | 6                                     | -1.966981000 | 2.849269000  | -0.352598000 |
| 1                                     | 3.113599000  | -2.741006000 | -0.726052000 | 1                                     | -2.297186000 | 2.506528000  | -1.341658000 |
| 1                                     | 4.393481000  | -1.947021000 | 0.253568000  | 1                                     | -2.707455000 | 2.538933000  | 0.394553000  |
| 6                                     | 3.188233000  | 0.315747000  | -1.327449000 | 1                                     | -1.886482000 | 3.954481000  | -0.351519000 |
| 1                                     | 2.994432000  | -0.226646000 | -2.265362000 | 6                                     | -0.244192000 | 2.666490000  | 1.329551000  |
| 1                                     | 2.770865000  | 1.329272000  | -1.417940000 | 1                                     | -0.965822000 | 2.266819000  | 2.057910000  |
| 1                                     | 4.276815000  | 0.377533000  | -1.166392000 | 1                                     | 0.758395000  | 2.276340000  | 1.550253000  |
| 6                                     | -3.312801000 | -2.134758000 | 0.172841000  | 1                                     | -0.231189000 | 3.772147000  | 1.408405000  |
| 1                                     | -2.977858000 | -2.710867000 | 1.048052000  | 6                                     | 0.338430000  | -2.787736000 | -1.016622000 |
| 1                                     | -4.395027000 | -1.943432000 | 0.254409000  | 1                                     | 1.339498000  | -2.406678000 | -0.787403000 |
| 1                                     | -3.115894000 | -2.738907000 | -0.724985000 | 1                                     | 0.334866000  | -3.895158000 | -0.976076000 |
| 6                                     | -3.188082000 | 0.317593000  | -1.327846000 | 1                                     | 0.057643000  | -2.457908000 | -2.025762000 |
| 1                                     | -2.994664000 | -0.225341000 | -2.265522000 | 6                                     | -1.967260000 | -2.849138000 | -0.352425000 |
| 1                                     | -4.276621000 | 0.380231000  | -1.166811000 | 1                                     | -2.297560000 | -2.506405000 | -1.341457000 |
| 1                                     | -2.770002000 | 1.330793000  | -1.418758000 | 1                                     | -1.886839000 | -3.954353000 | -0.351324000 |
| 1                                     | 0.002322000  | 5.385465000  | -0.270537000 | 1                                     | -2.707628000 | -2.538730000 | 0.394804000  |
| 1                                     | 0.000604000  | 1.509601000  | -2.160064000 | 1                                     | 5.390515000  | -0.000143000 | 0.245501000  |
| 6                                     | -3.003395000 | 0.368547000  | 1.542593000  | 1                                     | 1.510303000  | -0.000032000 | 2.116778000  |
| 1                                     | -2.681420000 | -0.140270000 | 2.463188000  | 6                                     | -0.244265000 | -2.666452000 | 1.329512000  |
| 1                                     | -2.580964000 | 1.383350000  | 1.541932000  | 1                                     | 0.758375000  | -2.276367000 | 1.550091000  |
| 1                                     | -4.103832000 | 0.421261000  | 1.519913000  | 1                                     | -0.965784000 | -2.266737000 | 2.057957000  |
| 6                                     | 3.003692000  | 0.365461000  | 1.543009000  | 1                                     | -0.231323000 | -3.772107000 | 1.408373000  |
| 1                                     | 2.681209000  | -0.143424000 | 2.463387000  | 6                                     | 0.338789000  | 2.787693000  | -1.016521000 |
| 1                                     | 4.104178000  | 0.417160000  | 1.520378000  | 1                                     | 0.058108000  | 2.457843000  | -2.025683000 |
| 1                                     | 2.582231000  | 1.380672000  | 1.542730000  | 1                                     | 0.335291000  | 3.895117000  | -0.976012000 |
| 6                                     | 0.000605000  | 1.430317000  | 0.023737000  | 1                                     | 1.339803000  | 2.406575000  | -0.787169000 |
| 15                                    | -2.349941000 | -0.554325000 | 0.078914000  | 6                                     | 1.427036000  | -0.000067000 | -0.069817000 |
| 1                                     | 0.000759000  | 1.818424000  | 2.162484000  | 1                                     | 1.838743000  | -0.000091000 | -2.206325000 |
| PCN-non<br>E(RB-P86) = -1075.40173977 |              |              |              | OCP-non<br>E(RB-P86) = -1055.94056032 |              |              |              |
| 15                                    | 0.931745000  | -1.991725000 | -0.028839000 | 8                                     | 0.378340000  | 2.534158000  | -0.175231000 |
| 8                                     | 3.709401000  | 0.666636000  | 0.214429000  | 8                                     | -3.464122000 | 1.495582000  | 0.360129000  |
| 6                                     | 2.541323000  | 0.565668000  | 0.126166000  | 6                                     | -2.361128000 | 1.123565000  | 0.204248000  |

|                            |              |              |              |                            |              |              |              |
|----------------------------|--------------|--------------|--------------|----------------------------|--------------|--------------|--------------|
| 44                         | 0.667823000  | 0.283012000  | -0.012935000 | 44                         | -0.589502000 | 0.447160000  | -0.005278000 |
| 7                          | 0.184328000  | 2.540584000  | -0.048079000 | 1                          | -0.835648000 | 0.393350000  | -1.544905000 |
| 1                          | 0.851014000  | 0.206427000  | -1.561788000 | 6                          | 2.221138000  | -0.291800000 | -1.247097000 |
| 6                          | -2.250731000 | -0.287933000 | -1.203690000 | 6                          | 2.054050000  | -0.593679000 | -1.130736000 |
| 6                          | -2.099495000 | -0.218839000 | 1.188534000  | 6                          | 1.212499000  | 2.989798000  | 0.904560000  |
| 6                          | -3.636138000 | -0.501165000 | -1.114514000 | 6                          | -0.531943000 | -2.756886000 | -1.377262000 |
| 6                          | -3.485617000 | -0.428966000 | 1.295725000  | 6                          | 3.588571000  | -0.605425000 | -1.192989000 |
| 1                          | -4.230473000 | -0.613792000 | -2.027737000 | 6                          | 3.423627000  | -0.904651000 | 1.200608000  |
| 1                          | -3.956359000 | -0.486078000 | 2.283068000  | 1                          | 4.183917000  | -0.608161000 | -2.112389000 |
| 6                          | -4.263631000 | -0.570921000 | 0.138393000  | 1                          | 3.882970000  | -1.144662000 | 2.165484000  |
| 6                          | 2.657400000  | -2.652770000 | -0.168480000 | 6                          | 4.198297000  | -0.914361000 | 0.032596000  |
| 1                          | 3.115546000  | -2.280861000 | -1.096757000 | 1                          | -0.897071000 | -3.794343000 | -1.308677000 |
| 1                          | 3.263199000  | -2.293079000 | 0.675769000  | 1                          | 0.563408000  | -2.735405000 | -1.294987000 |
| 1                          | 2.659469000  | -3.754593000 | -0.177119000 | 1                          | 0.598399000  | 3.329606000  | 1.759641000  |
| 6                          | 0.315939000  | -2.883665000 | 1.478397000  | 6                          | -0.418973000 | 3.596140000  | -0.727021000 |
| 1                          | 0.850560000  | -2.515601000 | 2.367288000  | 1                          | -0.970208000 | 3.171448000  | -1.573927000 |
| 1                          | -0.756949000 | -2.678029000 | 1.603450000  | 1                          | -1.131349000 | 3.986020000  | 0.022596000  |
| 1                          | 0.474739000  | -3.970632000 | 1.388115000  | 1                          | 0.241133000  | 4.411141000  | -1.074287000 |
| 6                          | -0.858180000 | 2.879728000  | -1.051252000 | 6                          | -3.068040000 | -2.030884000 | -0.248334000 |
| 1                          | -1.769777000 | 2.306855000  | -0.844105000 | 1                          | -3.409782000 | -1.567639000 | -1.185536000 |
| 1                          | -1.080599000 | 3.965929000  | -1.023356000 | 1                          | -3.276982000 | -3.112361000 | -0.278015000 |
| 1                          | -0.493910000 | 2.610169000  | -2.052114000 | 1                          | -3.626167000 | -1.572600000 | 0.580847000  |
| 6                          | 1.390079000  | 3.358589000  | -0.339937000 | 6                          | -0.870624000 | -2.704082000 | 1.481887000  |
| 1                          | 1.793649000  | 3.074488000  | -1.320829000 | 1                          | -1.350329000 | -2.242610000 | 2.358180000  |
| 1                          | 1.133929000  | 4.437776000  | -0.346274000 | 1                          | -1.233854000 | -3.739231000 | 1.375702000  |
| 1                          | 2.157656000  | 3.174042000  | 0.422606000  | 1                          | 0.217550000  | -2.714849000 | 1.638982000  |
| 1                          | -5.342142000 | -0.737055000 | 0.211719000  | 1                          | 5.262881000  | -1.161547000 | 0.076086000  |
| 1                          | -1.528360000 | -0.125898000 | 2.124363000  | 6                          | 1.406862000  | -0.266017000 | -0.088527000 |
| 6                          | -0.314395000 | 2.886468000  | 1.306367000  | 1                          | 1.850159000  | 3.821040000  | 0.555227000  |
| 1                          | -1.232433000 | 2.318211000  | 1.510846000  | 15                         | -1.257456000 | -1.709286000 | -0.036095000 |
| 1                          | 0.451941000  | 2.629177000  | 2.054044000  | 1                          | -0.811981000 | -2.335089000 | -2.353715000 |
| 1                          | -0.534548000 | 3.970779000  | 1.384081000  | 1                          | 1.842783000  | 2.140128000  | 1.196804000  |
| 6                          | 0.083698000  | -2.919625000 | -1.388137000 | 1                          | 1.778913000  | -0.047467000 | -2.218762000 |
| 1                          | 0.464466000  | -2.565595000 | -2.357571000 | 1                          | 1.481419000  | -0.600728000 | 2.069681000  |
| 1                          | 0.266916000  | -4.002469000 | -1.297886000 |                            |              |              |              |
| 1                          | -0.995540000 | -2.718064000 | -1.345450000 |                            |              |              |              |
| 6                          | -1.428716000 | -0.128164000 | -0.059490000 |                            |              |              |              |
| 1                          | -1.797111000 | -0.236360000 | -2.200060000 |                            |              |              |              |
| SCN-non                    |              |              |              | OCN-non                    |              |              |              |
| E(RB-P86) = -1092.28884940 |              |              |              | E(RB-P86) = -769.249092240 |              |              |              |
| 16                         | -0.467132000 | -2.243759000 | 0.391413000  | 8                          | -0.165318000 | 2.294288000  | -0.110729000 |
| 8                          | -3.729204000 | -0.089225000 | -0.340300000 | 8                          | -3.663969000 | 0.846776000  | 0.271493000  |
| 6                          | -2.573447000 | 0.025453000  | -0.147389000 | 6                          | -2.538797000 | 0.523614000  | 0.130290000  |
| 44                         | -0.690827000 | 0.077786000  | 0.079511000  | 44                         | -0.687536000 | 0.127183000  | -0.052376000 |
| 1                          | -0.919079000 | 0.165940000  | 1.621254000  | 1                          | -0.883789000 | 0.123564000  | -1.601190000 |
| 6                          | 2.257766000  | -0.190616000 | 1.273893000  | 6                          | 2.248506000  | -0.023187000 | -1.257348000 |
| 6                          | 2.138676000  | 0.027179000  | -1.113552000 | 6                          | 2.103530000  | -0.188141000 | 1.131360000  |
| 6                          | 0.156660000  | -3.011489000 | -1.162229000 | 6                          | -0.022122000 | 2.892040000  | 1.190218000  |
| 6                          | 0.467618000  | 2.871639000  | 0.878194000  | 6                          | -0.052585000 | -2.733913000 | -0.971939000 |
| 6                          | 3.657064000  | -0.278865000 | 1.199394000  | 6                          | 3.649786000  | -0.041758000 | -1.176994000 |
| 6                          | 3.538982000  | -0.061778000 | -1.205196000 | 6                          | 3.506601000  | -0.206057000 | 1.230176000  |
| 1                          | 4.244838000  | -0.405536000 | 2.114886000  | 1                          | 4.249878000  | 0.019382000  | -2.091480000 |
| 1                          | 4.028777000  | -0.016751000 | -2.183886000 | 1                          | 3.987370000  | -0.276760000 | 2.211932000  |
| 6                          | 4.307178000  | -0.210961000 | -0.042162000 | 6                          | 4.288243000  | -0.135904000 | 0.069385000  |
| 1                          | 0.491306000  | 3.976778000  | 0.799778000  | 1                          | -0.204761000 | -3.828931000 | -0.904660000 |
| 1                          | 1.443285000  | 2.453798000  | 0.606614000  | 1                          | 0.987280000  | -2.477412000 | -0.742472000 |
| 1                          | -0.515745000 | -2.786578000 | -2.002742000 | 1                          | -0.999801000 | 2.955777000  | 1.701567000  |
| 6                          | -2.099074000 | -3.084952000 | 0.454551000  | 6                          | -0.926759000 | 3.126141000  | -1.008580000 |
| 1                          | -2.622112000 | -2.695122000 | 1.337359000  | 1                          | -0.923433000 | 2.620829000  | -1.980965000 |
| 1                          | -2.691104000 | -2.868232000 | -0.444849000 | 1                          | -1.964620000 | 3.242259000  | -0.650668000 |
| 1                          | -1.939209000 | -4.167545000 | 0.566128000  | 1                          | -0.437486000 | 4.112738000  | -1.088392000 |
| 6                          | -1.878562000 | 2.950354000  | 0.344465000  | 6                          | -2.357271000 | -2.442152000 | -0.335863000 |
| 1                          | -2.151773000 | 2.648400000  | 1.363812000  | 1                          | -2.616932000 | -2.064836000 | -1.332888000 |
| 1                          | -1.793612000 | 4.054463000  | 0.295600000  | 1                          | -2.444168000 | -3.546142000 | -0.319552000 |
| 1                          | -2.662683000 | 2.614438000  | -0.345511000 | 1                          | -3.047327000 | -2.007962000 | 0.397888000  |
| 6                          | -0.253618000 | 2.681979000  | -1.425853000 | 6                          | -0.639304000 | -2.496263000 | 1.368091000  |

|                            |              |              |              |                            |              |              |              |
|----------------------------|--------------|--------------|--------------|----------------------------|--------------|--------------|--------------|
| 1                          | -1.022967000 | 2.271433000  | -2.096745000 | 1                          | -1.297365000 | -1.978966000 | 2.082110000  |
| 1                          | -0.219180000 | 3.782980000  | -1.549861000 | 1                          | -0.795604000 | -3.588992000 | 1.461921000  |
| 1                          | 0.727405000  | 2.262375000  | -1.687013000 | 1                          | 0.410333000  | -2.261301000 | 1.590717000  |
| 1                          | 5.397041000  | -0.279945000 | -0.103093000 | 1                          | 5.380010000  | -0.151698000 | 0.134532000  |
| 6                          | 1.446319000  | -0.021013000 | 0.124863000  | 6                          | 1.420548000  | -0.098095000 | -0.109533000 |
| 1                          | 0.240859000  | -4.098559000 | -1.016464000 | 1                          | 0.416313000  | 3.900022000  | 1.085907000  |
| 7                          | -0.581986000 | 2.317434000  | -0.023096000 | 7                          | -0.959584000 | -2.035252000 | -0.011531000 |
| 1                          | 0.239732000  | 2.582692000  | 1.912716000  | 1                          | -0.282913000 | -2.392280000 | -1.989241000 |
| 1                          | 1.149110000  | -2.579025000 | -1.343552000 | 1                          | 0.668596000  | 2.251672000  | 1.754420000  |
| 1                          | 1.783098000  | -0.258330000 | 2.258777000  | 1                          | 1.786119000  | 0.055475000  | -2.247659000 |
| 1                          | 1.576669000  | 0.130048000  | -2.054081000 | 1                          | 1.533017000  | -0.242198000 | 2.071751000  |
| SCS-non                    |              |              |              | OCS-non                    |              |              |              |
| E(RB-P86) = -1395.86392149 |              |              |              | E(RB-P86) = -1072.82714491 |              |              |              |
| 16                         | 0.339559000  | 2.313316000  | 0.446803000  | 8                          | 0.020043000  | 2.353022000  | 0.190982000  |
| 8                          | 3.762632000  | 0.178990000  | -0.212388000 | 8                          | 3.673638000  | 0.897942000  | -0.318186000 |
| 6                          | 2.592811000  | 0.111895000  | -0.141417000 | 6                          | 2.528340000  | 0.661408000  | -0.207625000 |
| 44                         | 0.695211000  | 0.010380000  | -0.013081000 | 44                         | 0.674235000  | 0.229414000  | -0.051327000 |
| 1                          | 0.873397000  | -0.226019000 | 1.517318000  | 1                          | 0.899481000  | 0.082035000  | 1.484634000  |
| 6                          | -2.249431000 | 0.235128000  | 1.178223000  | 6                          | -2.247126000 | 0.268319000  | 1.067910000  |
| 6                          | -2.137113000 | -0.366667000 | -1.147521000 | 6                          | -2.061012000 | -0.802881000 | -1.078268000 |
| 6                          | -0.472457000 | 3.065556000  | -1.022349000 | 6                          | -0.619098000 | 2.948952000  | -0.956339000 |
| 6                          | -0.407127000 | -3.126733000 | 0.934326000  | 6                          | 0.151136000  | -2.940012000 | 1.083874000  |
| 6                          | -3.652428000 | 0.229239000  | 1.115110000  | 6                          | -3.642116000 | 0.122460000  | 1.023744000  |
| 6                          | -3.540503000 | -0.366719000 | -1.225540000 | 6                          | -3.458799000 | -0.943644000 | -1.139314000 |
| 1                          | -4.238958000 | 0.461460000  | 2.010408000  | 1                          | -4.255165000 | 0.481442000  | 1.857494000  |
| 1                          | -4.035216000 | -0.606305000 | -2.172726000 | 1                          | -3.922609000 | -1.420989000 | -2.009036000 |
| 6                          | -4.306325000 | -0.070265000 | -0.089361000 | 6                          | -4.256637000 | -0.483235000 | -0.083627000 |
| 1                          | -0.477499000 | -4.204067000 | 0.724636000  | 1                          | 0.279019000  | -4.021296000 | 0.927708000  |
| 1                          | -1.402107000 | -2.665968000 | 0.917793000  | 1                          | -0.910406000 | -2.667945000 | 1.055929000  |
| 1                          | 0.140509000  | 2.913977000  | -1.922350000 | 1                          | 0.126360000  | 3.202014000  | -1.732425000 |
| 6                          | 1.907353000  | 3.268893000  | 0.409534000  | 6                          | 0.911453000  | 3.269538000  | 0.853885000  |
| 1                          | 2.529450000  | 2.890561000  | 1.230802000  | 1                          | 1.293589000  | 2.750392000  | 1.740061000  |
| 1                          | 2.432814000  | 3.124925000  | -0.544320000 | 1                          | 1.751810000  | 3.548128000  | 0.193480000  |
| 1                          | 1.683628000  | 4.333166000  | 0.574328000  | 1                          | 0.349479000  | 4.172301000  | 1.151160000  |
| 6                          | 2.165978000  | -3.154998000 | -0.122446000 | 6                          | 2.678182000  | -2.574852000 | 0.001647000  |
| 1                          | 2.543972000  | -2.925497000 | 0.882914000  | 1                          | 3.007127000  | -2.231812000 | 0.991688000  |
| 1                          | 2.038046000  | -4.239380000 | -0.254358000 | 1                          | 2.732391000  | -3.670986000 | -0.071523000 |
| 1                          | 2.865863000  | -2.769967000 | -0.874801000 | 1                          | 3.304497000  | -2.117994000 | -0.774658000 |
| 1                          | -5.398878000 | -0.074811000 | -0.141070000 | 1                          | -5.343908000 | -0.597433000 | -0.120253000 |
| 6                          | -1.442891000 | -0.061233000 | 0.051821000  | 6                          | -1.407882000 | -0.181840000 | 0.017737000  |
| 1                          | -0.629052000 | 4.138592000  | -0.838184000 | 1                          | -1.156127000 | 3.861234000  | -0.643601000 |
| 16                         | 0.557178000  | -2.319564000 | -0.404618000 | 16                         | 0.948597000  | -2.042755000 | -0.312686000 |
| 1                          | 0.071964000  | -2.943644000 | 1.905471000  | 1                          | 0.595211000  | -2.622243000 | 2.036569000  |
| 1                          | -1.438437000 | 2.556643000  | -1.133598000 | 1                          | -1.334664000 | 2.207681000  | -1.333907000 |
| 1                          | -1.770497000 | 0.481724000  | 2.131713000  | 1                          | -1.798955000 | 0.753139000  | 1.941606000  |
| 1                          | -1.574368000 | -0.618620000 | -2.056556000 | 1                          | -1.469104000 | -1.190826000 | -1.917691000 |
| PCS-non                    |              |              |              | OCO-non                    |              |              |              |
| E(RB-P86) = -1378.97433775 |              |              |              | E(RB-P86) = -749.784170955 |              |              |              |
| 15                         | -0.965986000 | -2.028142000 | 0.101464000  | 8                          | 0.463298000  | 2.163653000  | 0.030720000  |
| 8                          | -3.693159000 | 0.809861000  | -0.208188000 | 8                          | 3.796691000  | 0.139093000  | -0.114989000 |
| 6                          | -2.537814000 | 0.605451000  | -0.184630000 | 6                          | 2.621074000  | 0.082472000  | -0.081314000 |
| 44                         | -0.669425000 | 0.250464000  | -0.089912000 | 44                         | 0.714989000  | 0.006280000  | 0.012414000  |
| 16                         | -0.025853000 | 2.580127000  | -0.373957000 | 1                          | 0.854790000  | 0.018143000  | 1.564909000  |
| 1                          | -0.797462000 | 0.323680000  | 1.463599000  | 6                          | -2.189362000 | 0.815407000  | 0.871438000  |
| 6                          | 2.232738000  | -0.337190000 | 1.138104000  | 6                          | -2.098340000 | -0.900553000 | -0.812038000 |
| 6                          | 2.109449000  | -0.213218000 | -1.256700000 | 6                          | 0.127203000  | 2.704300000  | -1.265959000 |
| 6                          | 3.618418000  | -0.556426000 | 1.059502000  | 6                          | 0.124144000  | -2.797326000 | 1.167214000  |
| 6                          | 3.494407000  | -0.432871000 | -1.350991000 | 6                          | -3.590535000 | 0.819778000  | 0.798654000  |
| 1                          | 4.202665000  | -0.686891000 | 1.976790000  | 6                          | -3.500767000 | -0.893017000 | -0.907497000 |
| 1                          | 3.977450000  | -0.463284000 | -2.333344000 | 1                          | -4.170036000 | 1.489612000  | 1.443265000  |
| 6                          | 4.257828000  | -0.607484000 | -0.187943000 | 1                          | -4.005593000 | -1.563817000 | -1.611136000 |
| 6                          | -2.704890000 | -2.658364000 | 0.200833000  | 6                          | -4.254577000 | -0.033440000 | -0.096755000 |
| 1                          | -3.201756000 | -2.218848000 | 1.078245000  | 1                          | -0.125902000 | -3.849058000 | 0.945589000  |
| 1                          | -3.261567000 | -2.348035000 | -0.695433000 | 1                          | -0.770561000 | -2.240640000 | 1.464543000  |
| 1                          | -2.726292000 | -3.757058000 | 0.282294000  | 1                          | 0.991974000  | 2.633318000  | -1.949698000 |

|   |              |              |              |   |              |              |              |
|---|--------------|--------------|--------------|---|--------------|--------------|--------------|
| 6 | -0.280363000 | -3.019375000 | -1.308012000 | 6 | 1.464733000  | 2.954662000  | 0.706171000  |
| 1 | -0.772620000 | -2.715556000 | -2.244332000 | 1 | 1.606143000  | 2.501872000  | 1.693704000  |
| 1 | 0.796174000  | -2.813840000 | -1.397290000 | 1 | 2.415949000  | 2.938524000  | 0.147235000  |
| 1 | -0.440457000 | -4.098524000 | -1.150948000 | 1 | 1.094396000  | 3.989551000  | 0.805021000  |
| 6 | -1.365907000 | 3.712593000  | 0.158347000  | 6 | 1.732081000  | -2.888904000 | -0.600318000 |
| 1 | -1.652040000 | 3.502535000  | 1.197883000  | 1 | 2.594904000  | -2.852605000 | 0.086305000  |
| 1 | -1.029865000 | 4.754012000  | 0.048560000  | 1 | 1.430635000  | -3.935007000 | -0.781660000 |
| 1 | -2.223500000 | 3.528608000  | -0.501085000 | 1 | 1.991660000  | -2.401536000 | -1.547312000 |
| 1 | 5.336186000  | -0.778059000 | -0.252939000 | 1 | -5.346761000 | -0.029695000 | -0.158796000 |
| 1 | 1.550588000  | -0.071852000 | -2.192862000 | 6 | -1.393083000 | -0.041730000 | 0.070301000  |
| 6 | 1.261838000  | 3.074596000  | 0.832754000  | 1 | -0.179437000 | 3.757977000  | -1.150390000 |
| 1 | 0.895232000  | 2.928215000  | 1.857965000  | 8 | 0.610582000  | -2.168744000 | -0.045730000 |
| 1 | 2.125322000  | 2.422275000  | 0.655020000  | 1 | 0.893307000  | -2.742296000 | 1.956147000  |
| 1 | 1.532646000  | 4.125930000  | 0.658008000  | 1 | -0.715616000 | 2.109065000  | -1.639365000 |
| 6 | -0.192560000 | -2.854208000 | 1.564859000  | 1 | -1.698808000 | 1.499637000  | 1.572194000  |
| 1 | -0.617408000 | -2.429051000 | 2.486126000  | 1 | -1.540546000 | -1.601274000 | -1.446162000 |
| 1 | -0.376282000 | -3.940513000 | 1.545311000  |   |              |              |              |
| 1 | 0.888942000  | -2.659778000 | 1.558031000  |   |              |              |              |
| 6 | 1.428470000  | -0.158308000 | -0.013786000 |   |              |              |              |
| 1 | 1.767786000  | -0.294346000 | 2.129354000  |   |              |              |              |
